# Supplementary material for: ATP2C2 Has Potential to Define Tumor Microenvironment in Breast Cancer
Source: PubMed Central journal article supplement (PMC8079766; doi:10.3389/fimmu.2021.657950), 2021-04-14
Supplement: DataSheet_1.pdf [file DataSheet_1.pdf]

| id       | logFC    | AveExpr  | t        | P.Value  | adj.P.Val | B        |
|----------|----------|----------|----------|----------|-----------|----------|
| HLA-DMB  | 1.286124 | 9.86216  | 25.8441  | 7.61E-99 | 9.11E-95  | 214.7438 |
| CD2      | 1.944407 | 7.877363 | 24.97015 | 2.98E-94 | 1.26E-90  | 204.2268 |
| SELL     | 2.0961   | 6.998906 | 24.96574 | 3.15E-94 | 1.26E-90  | 204.1737 |
| CCL5     | 2.11547  | 8.520577 | 24.76508 | 3.58E-93 | 1.07E-89  | 201.7566 |
| CD52     | 1.984791 | 8.337885 | 24.58263 | 3.26E-92 | 7.81E-89  | 199.5585 |
| LCK      | 1.568475 | 6.711861 | 24.51093 | 7.78E-92 | 1.55E-88  | 198.6945 |
| NKG7     | 1.951421 | 6.351292 | 24.31999 | 7.87E-91 | 1.35E-87  | 196.3934 |
| IRF8     | 1.49214  | 8.384907 | 24.16993 | 4.85E-90 | 7.25E-87  | 194.5849 |
| GZMK     | 2.422592 | 7.159408 | 23.57555 | 6.51E-87 | 8.66E-84  | 187.4217 |
| PLEK     | 1.319732 | 7.424039 | 23.20234 | 5.98E-85 | 7.16E-82  | 182.9255 |
| ITK      | 1.73523  | 6.159723 | 23.02555 | 5.09E-84 | 5.54E-81  | 180.7966 |
| NCF4     | 1.248745 | 6.251626 | 22.82445 | 5.80E-83 | 5.79E-80  | 178.3757 |
| CD247    | 1.572636 | 6.361144 | 22.40301 | 9.49E-81 | 8.74E-78  | 173.3064 |
| PVRIG    | 1.484893 | 6.109053 | 22.28136 | 4.13E-80 | 3.53E-77  | 171.8443 |
| RAC2     | 1.458748 | 7.951689 | 22.16356 | 1.71E-79 | 1.37E-76  | 170.4291 |
| CD86     | 1.269315 | 6.603567 | 22.12797 | 2.63E-79 | 1.97E-76  | 170.0017 |
| CORO1A   | 1.495244 | 8.33725  | 22.05342 | 6.47E-79 | 4.56E-76  | 169.1065 |
| SLAMF7   | 1.763273 | 6.271421 | 21.95906 | 2.02E-78 | 1.34E-75  | 167.9738 |
| LYZ      | 2.09268  | 9.984262 | 21.94597 | 2.37E-78 | 1.49E-75  | 167.8167 |
| TRAT1    | 1.769833 | 4.863698 | 21.80352 | 1.32E-77 | 7.90E-75  | 166.1077 |
| CXCL9    | 2.863315 | 9.271134 | 21.74136 | 2.79E-77 | 1.59E-74  | 165.3623 |
| CD8A     | 1.619313 | 7.314496 | 21.67255 | 6.40E-77 | 3.48E-74  | 164.5374 |
| IL2RB    | 1.484689 | 7.414917 | 21.58585 | 1.82E-76 | 9.46E-74  | 163.4985 |
| IL7R     | 1.87331  | 8.160879 | 21.58123 | 1.92E-76 | 9.59E-74  | 163.4431 |
| SLAMF8   | 1.570605 | 6.905166 | 21.38237 | 2.11E-75 | 1.01E-72  | 161.062  |
| GIMAP4   | 1.507128 | 7.738433 | 21.09481 | 6.69E-74 | 3.08E-71  | 157.6233 |
| IL10RA   | 1.312374 | 8.100197 | 20.93281 | 4.68E-73 | 2.07E-70  | 155.6888 |
| STAT4    | 1.338085 | 6.23142  | 20.86423 | 1.06E-72 | 4.55E-70  | 154.8705 |
| CST7     | 1.42525  | 6.924711 | 20.84516 | 1.34E-72 | 5.52E-70  | 154.6431 |
| CD38     | 2.022663 | 6.259326 | 20.82142 | 1.78E-72 | 7.10E-70  | 154.3598 |
| CCR7     | 1.641965 | 6.604924 | 20.78656 | 2.70E-72 | 1.04E-69  | 153.9442 |
| PLAC8    | 2.011271 | 6.53997  | 20.77956 | 2.94E-72 | 1.10E-69  | 153.8608 |
| LAPTM5   | 1.346842 | 10.47466 | 20.37902 | 3.55E-70 | 1.29E-67  | 149.0925 |
| THEMIS2  | 1.111826 | 6.991203 | 20.19522 | 3.19E-69 | 1.12E-66  | 146.9095 |
| LST1     | 0.865559 | 7.540641 | 20.1581  | 4.96E-69 | 1.70E-66  | 146.4689 |
| CYTIP    | 1.533163 | 7.323165 | 20.09758 | 1.02E-68 | 3.39E-66  | 145.7512 |
| CXCL10   | 2.686763 | 9.387481 | 20.03114 | 2.25E-68 | 7.29E-66  | 144.9636 |
| CD27     | 1.36726  | 7.193872 | 20.02095 | 2.54E-68 | 8.01E-66  | 144.8428 |
| BIN2     | 1.640771 | 6.142946 | 19.98968 | 3.69E-68 | 1.13E-65  | 144.4724 |
| ARHGAP25 | 0.934011 | 6.133084 | 19.97062 | 4.63E-68 | 1.39E-65  | 144.2465 |
| CTSS     | 1.507939 | 8.304086 | 19.93105 | 7.42E-68 | 2.17E-65  | 143.7781 |
| FYB      | 1.110663 | 6.542518 | 19.90881 | 9.67E-68 | 2.76E-65  | 143.5147 |
| EVI2B    | 1.712366 | 8.232598 | 19.80676 | 3.26E-67 | 9.06E-65  | 142.3074 |

|          |          |          |          |          |          |          |
|----------|----------|----------|----------|----------|----------|----------|
| HLA-DMA  | 1.354799 | 9.656969 | 19.78199 | 4.37E-67 | 1.19E-64 | 142.0145 |
| C1QB     | 1.389893 | 9.444823 | 19.72445 | 8.66E-67 | 2.30E-64 | 141.3344 |
| CSF2RB   | 1.602223 | 7.431417 | 19.68974 | 1.31E-66 | 3.40E-64 | 140.9244 |
| LILRB1   | 1.144444 | 6.509686 | 19.68033 | 1.46E-66 | 3.73E-64 | 140.8132 |
| HLA-DRA  | 1.864505 | 11.70093 | 19.5832  | 4.63E-66 | 1.16E-63 | 139.6666 |
| LYN      | 1.125388 | 8.273131 | 19.55608 | 6.39E-66 | 1.56E-63 | 139.3467 |
| LILRB2   | 1.208976 | 5.857635 | 19.42639 | 2.97E-65 | 7.11E-63 | 137.8181 |
| GMFG     | 1.127517 | 8.317252 | 19.39886 | 4.12E-65 | 9.66E-63 | 137.4938 |
| ADAMDEC1 | 2.310146 | 6.90541  | 19.23179 | 2.97E-64 | 6.84E-62 | 135.5284 |
| FGL2     | 1.540521 | 8.267236 | 19.19163 | 4.78E-64 | 1.08E-61 | 135.0565 |
| GZMB     | 1.990855 | 6.387936 | 19.1886  | 4.95E-64 | 1.10E-61 | 135.0208 |
| GPR183   | 1.554543 | 6.979719 | 19.16773 | 6.33E-64 | 1.38E-61 | 134.7757 |
| HLA-F    | 0.926742 | 9.622957 | 19.10874 | 1.27E-63 | 2.72E-61 | 134.0832 |
| PTPRC    | 1.353641 | 7.140303 | 19.08684 | 1.65E-63 | 3.45E-61 | 133.8262 |
| SH2D1A   | 1.083614 | 5.245442 | 19.04665 | 2.64E-63 | 5.45E-61 | 133.3548 |
| CTSW     | 1.748638 | 5.502985 | 18.93768 | 9.55E-63 | 1.94E-60 | 132.0776 |
| BTN3A3   | 1.167529 | 7.379521 | 18.8234  | 3.66E-62 | 7.31E-60 | 130.7403 |
| LAIR1    | 1.157194 | 6.728    | 18.78753 | 5.59E-62 | 1.10E-59 | 130.3208 |
| CD3D     | 1.723894 | 8.023247 | 18.73665 | 1.02E-61 | 1.96E-59 | 129.7263 |
| MS4A4A   | 1.505719 | 7.178131 | 18.54485 | 9.64E-61 | 1.83E-58 | 127.4887 |
| TRAF3IP3 | 1.019907 | 5.818837 | 18.35125 | 9.28E-60 | 1.74E-57 | 125.2361 |
| LAMP3    | 1.929175 | 7.105349 | 18.34016 | 1.06E-59 | 1.95E-57 | 125.1073 |
| CSF2RA   | 1.030156 | 5.589357 | 18.2269  | 3.96E-59 | 7.19E-57 | 123.7926 |
| FPR3     | 1.479962 | 6.985719 | 18.19649 | 5.65E-59 | 1.01E-56 | 123.44   |
| GNLY     | 1.537777 | 5.846409 | 18.09115 | 1.93E-58 | 3.39E-56 | 122.2198 |
| ZAP70    | 1.204401 | 5.468953 | 18.05364 | 2.98E-58 | 5.17E-56 | 121.7858 |
| GPR171   | 1.828738 | 5.585343 | 17.93296 | 1.21E-57 | 2.07E-55 | 120.3911 |
| HCLS1    | 1.384999 | 8.454018 | 17.9101  | 1.58E-57 | 2.66E-55 | 120.1273 |
| VAV1     | 0.834487 | 6.338725 | 17.88765 | 2.05E-57 | 3.41E-55 | 119.8682 |
| TNFAIP3  | 0.985894 | 8.336424 | 17.84858 | 3.23E-57 | 5.29E-55 | 119.4176 |
| SLA      | 1.260542 | 7.710599 | 17.8423  | 3.47E-57 | 5.55E-55 | 119.3452 |
| CSF1R    | 1.012611 | 8.09538  | 17.84205 | 3.48E-57 | 5.55E-55 | 119.3423 |
| NCKAP1L  | 1.02391  | 6.965537 | 17.7587  | 9.14E-57 | 1.44E-54 | 118.3822 |
| SLC15A3  | 1.143114 | 7.515096 | 17.74943 | 1.02E-56 | 1.58E-54 | 118.2755 |
| TMEM140  | 0.828844 | 7.591097 | 17.67213 | 2.49E-56 | 3.82E-54 | 117.3862 |
| GPR18    | 1.733012 | 5.497298 | 17.62284 | 4.40E-56 | 6.67E-54 | 116.8199 |
| IL2RG    | 1.606692 | 7.436872 | 17.5561  | 9.51E-56 | 1.42E-53 | 116.0537 |
| CECR1    | 1.47761  | 8.404794 | 17.43014 | 4.06E-55 | 6.00E-53 | 114.6103 |
| SPOCK2   | 1.067685 | 6.574666 | 17.30897 | 1.64E-54 | 2.39E-52 | 113.2248 |
| BCL2A1   | 1.845516 | 6.350907 | 17.28903 | 2.06E-54 | 2.97E-52 | 112.9972 |
| ITGB2    | 1.291475 | 7.97072  | 17.23921 | 3.64E-54 | 5.19E-52 | 112.4286 |
| P2RX5    | 1.599502 | 5.839978 | 17.23603 | 3.78E-54 | 5.32E-52 | 112.3923 |
| IL21R    | 1.08841  | 5.373156 | 17.23083 | 4.01E-54 | 5.58E-52 | 112.3329 |
| UBASH3A  | 1.187646 | 4.478202 | 17.19815 | 5.83E-54 | 8.03E-52 | 111.9604 |

|          |          |          |          |          |          |          |
|----------|----------|----------|----------|----------|----------|----------|
| C1QA     | 1.591542 | 8.749876 | 17.19598 | 5.98E-54 | 8.14E-52 | 111.9356 |
| LRMP     | 1.297627 | 6.067823 | 17.14892 | 1.03E-53 | 1.38E-51 | 111.3995 |
| IDO1     | 1.950694 | 6.832901 | 17.13085 | 1.26E-53 | 1.68E-51 | 111.1938 |
| PRKCQ    | 1.258384 | 5.388456 | 17.0745  | 2.40E-53 | 3.16E-51 | 110.5527 |
| CASP1    | 1.366075 | 7.551502 | 17.05654 | 2.95E-53 | 3.84E-51 | 110.3486 |
| RASSF2   | 1.02046  | 7.811549 | 17.04726 | 3.28E-53 | 4.22E-51 | 110.243  |
| CXCL11   | 2.298366 | 6.352282 | 17.04198 | 3.49E-53 | 4.44E-51 | 110.183  |
| PTPRCAP  | 1.201226 | 6.909064 | 17.01183 | 4.92E-53 | 6.20E-51 | 109.8406 |
| CD79A    | 1.332229 | 6.331446 | 16.99488 | 5.97E-53 | 7.45E-51 | 109.6481 |
| ITGA4    | 1.014776 | 5.574225 | 16.97638 | 7.38E-53 | 9.10E-51 | 109.4381 |
| CCR2     | 1.20631  | 5.467009 | 16.97465 | 7.52E-53 | 9.19E-51 | 109.4184 |
| DENND1C  | 0.767594 | 6.243366 | 16.95663 | 9.24E-53 | 1.12E-50 | 109.2139 |
| PRF1     | 1.109908 | 6.678126 | 16.86896 | 2.51E-52 | 3.01E-50 | 108.2203 |
| SASH3    | 0.912585 | 7.354997 | 16.80196 | 5.38E-52 | 6.38E-50 | 107.462  |
| CD163    | 1.161455 | 6.989613 | 16.75685 | 8.99E-52 | 1.06E-49 | 106.9522 |
| GPR65    | 1.664806 | 6.950557 | 16.6854  | 2.02E-51 | 2.35E-49 | 106.1455 |
| PPP1R16B | 1.198769 | 6.289627 | 16.50526 | 1.56E-50 | 1.79E-48 | 104.1172 |
| IGKC     | 1.103012 | 7.004671 | 16.49119 | 1.83E-50 | 2.08E-48 | 103.9592 |
| LCP1     | 1.362572 | 8.894776 | 16.41724 | 4.21E-50 | 4.75E-48 | 103.129  |
| CD180    | 1.060592 | 6.288285 | 16.40902 | 4.62E-50 | 5.16E-48 | 103.0368 |
| IL15RA   | 0.784237 | 7.435523 | 16.30242 | 1.53E-49 | 1.70E-47 | 101.8428 |
| CXCR3    | 1.006129 | 5.622929 | 16.29739 | 1.62E-49 | 1.78E-47 | 101.7866 |
| PSMB9    | 1.47861  | 8.967019 | 16.29302 | 1.71E-49 | 1.86E-47 | 101.7377 |
| FYN      | 0.788011 | 7.394268 | 16.26566 | 2.32E-49 | 2.50E-47 | 101.4319 |
| BIRC3    | 1.305735 | 6.906873 | 16.23387 | 3.32E-49 | 3.55E-47 | 101.0767 |
| MS4A1    | 1.738497 | 5.981247 | 16.22505 | 3.66E-49 | 3.88E-47 | 100.9782 |
| AKR1B1   | 0.837247 | 9.239688 | 16.16033 | 7.58E-49 | 7.95E-47 | 100.256  |
| WARS     | 1.113613 | 8.9505   | 16.14444 | 9.05E-49 | 9.42E-47 | 100.0788 |
| CPVL     | 1.236251 | 7.548229 | 16.14089 | 9.42E-49 | 9.72E-47 | 100.0393 |
| GZMA     | 1.64071  | 6.892182 | 16.12583 | 1.12E-48 | 1.14E-46 | 99.87149 |
| SH2B3    | 0.687379 | 7.651047 | 16.11909 | 1.20E-48 | 1.22E-46 | 99.79643 |
| TRIM22   | 1.350763 | 9.461829 | 16.11405 | 1.27E-48 | 1.28E-46 | 99.7403  |
| HLA-DPA1 | 1.367541 | 10.78595 | 16.0857  | 1.75E-48 | 1.74E-46 | 99.42462 |
| IL32     | 1.65741  | 7.68651  | 15.96583 | 6.68E-48 | 6.61E-46 | 98.09238 |
| STK10    | 0.63698  | 7.073862 | 15.95319 | 7.69E-48 | 7.55E-46 | 97.95218 |
| GBP1     | 1.333718 | 8.932846 | 15.89916 | 1.41E-47 | 1.37E-45 | 97.35313 |
| CD48     | 1.456968 | 7.468759 | 15.79252 | 4.61E-47 | 4.45E-45 | 96.17318 |
| BTN3A1   | 0.715062 | 7.642172 | 15.74252 | 8.03E-47 | 7.69E-45 | 95.62093 |
| SEMA4D   | 0.780878 | 6.854583 | 15.71932 | 1.04E-46 | 9.87E-45 | 95.36507 |
| P2RY13   | 1.20024  | 5.284071 | 15.59773 | 4.00E-46 | 3.77E-44 | 94.02606 |
| CCL18    | 2.050245 | 7.132253 | 15.58292 | 4.71E-46 | 4.40E-44 | 93.86329 |
| CCL19    | 1.934853 | 8.532582 | 15.54961 | 6.80E-46 | 6.31E-44 | 93.49738 |
| MS4A6A   | 1.206772 | 8.185482 | 15.54312 | 7.31E-46 | 6.73E-44 | 93.42603 |
| MYO1F    | 0.65043  | 7.409432 | 15.53622 | 7.89E-46 | 7.21E-44 | 93.35038 |

|          |          |          |          |          |          |          |
|----------|----------|----------|----------|----------|----------|----------|
| P2RY10   | 1.111464 | 4.763593 | 15.46426 | 1.75E-45 | 1.58E-43 | 92.56125 |
| TLR1     | 1.163477 | 6.195387 | 15.46169 | 1.80E-45 | 1.62E-43 | 92.53307 |
| FAM65B   | 1.012095 | 5.741029 | 15.44871 | 2.07E-45 | 1.85E-43 | 92.39088 |
| HLA-B    | 1.004054 | 12.72965 | 15.42414 | 2.72E-45 | 2.41E-43 | 92.12195 |
| HLA-DOB  | 1.06757  | 5.657835 | 15.42299 | 2.75E-45 | 2.42E-43 | 92.10935 |
| HLA-G    | 1.113071 | 10.74949 | 15.38303 | 4.27E-45 | 3.73E-43 | 91.67228 |
| TNFRSF1B | 0.928532 | 7.731856 | 15.35849 | 5.59E-45 | 4.85E-43 | 91.40411 |
| CTSC     | 1.23915  | 8.815854 | 15.3549  | 5.82E-45 | 5.01E-43 | 91.36485 |
| TAP1     | 1.183593 | 9.398516 | 15.29903 | 1.07E-44 | 9.19E-43 | 90.75515 |
| CD19     | 1.271773 | 5.278504 | 15.26982 | 1.48E-44 | 1.26E-42 | 90.43667 |
| PSTPIP1  | 1.0896   | 5.593223 | 15.26605 | 1.54E-44 | 1.30E-42 | 90.39563 |
| PLEKHO2  | 0.664096 | 8.101243 | 15.26031 | 1.64E-44 | 1.38E-42 | 90.33307 |
| RNASE6   | 1.471034 | 7.625096 | 15.22363 | 2.46E-44 | 2.04E-42 | 89.93363 |
| IGK      | 1.986458 | 6.551243 | 15.16774 | 4.53E-44 | 3.74E-42 | 89.32594 |
| LGALS2   | 1.413723 | 5.496478 | 15.14532 | 5.79E-44 | 4.74E-42 | 89.08234 |
| BCL11B   | 0.921419 | 6.066316 | 15.11028 | 8.49E-44 | 6.91E-42 | 88.70203 |
| NCF2     | 1.08103  | 7.178926 | 15.1057  | 8.92E-44 | 7.21E-42 | 88.65238 |
| GIMAP6   | 1.177868 | 7.718523 | 15.05685 | 1.52E-43 | 1.22E-41 | 88.12293 |
| ICOS     | 1.353566 | 4.824563 | 15.05018 | 1.63E-43 | 1.30E-41 | 88.05068 |
| CD14     | 0.983819 | 9.505546 | 15.04353 | 1.76E-43 | 1.39E-41 | 87.97868 |
| PIM2     | 1.331166 | 6.771044 | 15.02789 | 2.08E-43 | 1.64E-41 | 87.80945 |
| NPL      | 0.827335 | 6.693349 | 14.98719 | 3.25E-43 | 2.54E-41 | 87.36929 |
| ACSL5    | 0.871996 | 7.098747 | 14.98339 | 3.38E-43 | 2.63E-41 | 87.3282  |
| TFEC     | 1.151264 | 5.637968 | 14.94255 | 5.27E-43 | 4.07E-41 | 86.88704 |
| BTK      | 0.856034 | 6.195699 | 14.94079 | 5.38E-43 | 4.12E-41 | 86.86801 |
| ADA      | 0.813293 | 6.772457 | 14.88375 | 9.98E-43 | 7.61E-41 | 86.2529  |
| ICAM2    | 0.826148 | 7.859025 | 14.81657 | 2.07E-42 | 1.57E-40 | 85.52976 |
| LTB      | 0.962557 | 6.879059 | 14.79775 | 2.53E-42 | 1.91E-40 | 85.32744 |
| HCK      | 0.868571 | 7.491012 | 14.79044 | 2.74E-42 | 2.05E-40 | 85.24886 |
| C3AR1    | 0.997609 | 8.517678 | 14.75129 | 4.19E-42 | 3.11E-40 | 84.82846 |
| BTN3A2   | 1.132994 | 7.966241 | 14.7431  | 4.58E-42 | 3.38E-40 | 84.74062 |
| FGR      | 0.721335 | 6.721592 | 14.66904 | 1.02E-41 | 7.47E-40 | 83.94692 |
| IPCEF1   | 0.919222 | 5.589347 | 14.65417 | 1.19E-41 | 8.67E-40 | 83.78773 |
| MAP4K1   | 1.070667 | 5.857263 | 14.65403 | 1.20E-41 | 8.67E-40 | 83.78631 |
| MX2      | 1.067127 | 8.136261 | 14.64333 | 1.34E-41 | 9.67E-40 | 83.67178 |
| CXCR6    | 0.827438 | 5.559232 | 14.63129 | 1.53E-41 | 1.09E-39 | 83.54307 |
| IKZF1    | 0.648326 | 5.254925 | 14.56214 | 3.21E-41 | 2.29E-39 | 82.80456 |
| BANK1    | 1.15536  | 5.116789 | 14.54883 | 3.71E-41 | 2.62E-39 | 82.66261 |
| HLA-A    | 0.662152 | 13.29201 | 14.50087 | 6.20E-41 | 4.36E-39 | 82.15154 |
| STAT1    | 1.267198 | 8.895016 | 14.48661 | 7.22E-41 | 5.06E-39 | 81.99972 |
| GPSM3    | 0.808285 | 6.707945 | 14.47799 | 7.92E-41 | 5.51E-39 | 81.90803 |
| PNOC     | 1.182805 | 5.24906  | 14.4643  | 9.17E-41 | 6.35E-39 | 81.76236 |
| EMP3     | 1.03158  | 8.489506 | 14.33197 | 3.77E-40 | 2.59E-38 | 80.35818 |
| LAG3     | 1.1498   | 4.808974 | 14.32594 | 4.02E-40 | 2.75E-38 | 80.29437 |

|          |          |          |          |          |          |          |
|----------|----------|----------|----------|----------|----------|----------|
| XCL1     | 0.755232 | 5.024408 | 14.27213 | 7.13E-40 | 4.85E-38 | 79.72519 |
| LAX1     | 1.132856 | 6.347219 | 14.24954 | 9.07E-40 | 6.13E-38 | 79.48659 |
| FCER1G   | 1.402688 | 8.672303 | 14.24353 | 9.67E-40 | 6.50E-38 | 79.42318 |
| MRC1     | 1.449131 | 7.329689 | 14.2318  | 1.10E-39 | 7.32E-38 | 79.29931 |
| BIN1     | 0.720916 | 7.055811 | 14.21338 | 1.33E-39 | 8.86E-38 | 79.10504 |
| SLC7A7   | 0.989836 | 8.27169  | 14.20266 | 1.49E-39 | 9.87E-38 | 78.99198 |
| TYROBP   | 1.054129 | 9.839423 | 14.19952 | 1.54E-39 | 1.01E-37 | 78.9589  |
| SIGLEC1  | 0.942674 | 6.546926 | 14.18936 | 1.72E-39 | 1.12E-37 | 78.85182 |
| CRTAM    | 1.254426 | 5.055819 | 14.14131 | 2.86E-39 | 1.86E-37 | 78.34597 |
| SRGN     | 1.170669 | 9.298116 | 14.11799 | 3.66E-39 | 2.37E-37 | 78.1007  |
| CMKLR1   | 0.779425 | 5.822935 | 14.11639 | 3.72E-39 | 2.40E-37 | 78.08394 |
| CCL2     | 1.492287 | 8.79973  | 14.11385 | 3.83E-39 | 2.45E-37 | 78.05721 |
| PLEKHO1  | 0.957817 | 7.801611 | 14.09625 | 4.61E-39 | 2.93E-37 | 77.8723  |
| CLEC4A   | 0.986694 | 5.959257 | 14.08957 | 4.95E-39 | 3.13E-37 | 77.80212 |
| CXCL13   | 2.580152 | 7.689947 | 14.06351 | 6.51E-39 | 4.10E-37 | 77.52859 |
| TNFRSF17 | 2.069853 | 5.496112 | 14.02096 | 1.02E-38 | 6.40E-37 | 77.08253 |
| CCR1     | 1.004437 | 7.305346 | 14.00031 | 1.27E-38 | 7.91E-37 | 76.86632 |
| NCF1     | 0.956161 | 6.589617 | 13.94627 | 2.24E-38 | 1.39E-36 | 76.30109 |
| HLA-E    | 0.711944 | 11.22901 | 13.89954 | 3.66E-38 | 2.26E-36 | 75.81335 |
| MPP1     | 0.794593 | 7.602457 | 13.89643 | 3.79E-38 | 2.32E-36 | 75.78093 |
| LY9      | 0.916464 | 5.121926 | 13.89118 | 4.00E-38 | 2.44E-36 | 75.72614 |
| PILRA    | 0.626172 | 6.21754  | 13.86313 | 5.37E-38 | 3.26E-36 | 75.43385 |
| GZMH     | 1.217444 | 5.646569 | 13.77481 | 1.35E-37 | 8.19E-36 | 74.51534 |
| CD3G     | 1.234919 | 5.692021 | 13.76047 | 1.57E-37 | 9.46E-36 | 74.36647 |
| WAS      | 0.545056 | 6.803692 | 13.75006 | 1.75E-37 | 1.05E-35 | 74.25839 |
| SH2D2A   | 1.1601   | 5.839148 | 13.74882 | 1.78E-37 | 1.06E-35 | 74.24558 |
| TCN2     | 0.917763 | 6.975998 | 13.7459  | 1.83E-37 | 1.09E-35 | 74.21534 |
| CD72     | 1.053422 | 5.472937 | 13.73436 | 2.07E-37 | 1.22E-35 | 74.09558 |
| CD40     | 0.598824 | 6.29912  | 13.72938 | 2.18E-37 | 1.28E-35 | 74.04398 |
| CD3E     | 1.446483 | 5.95934  | 13.6871  | 3.38E-37 | 1.98E-35 | 73.60612 |
| TLR7     | 1.021067 | 6.224212 | 13.67077 | 4.01E-37 | 2.33E-35 | 73.43719 |
| RASSF4   | 0.774789 | 6.110873 | 13.63844 | 5.62E-37 | 3.25E-35 | 73.10296 |
| KLRB1    | 1.318134 | 6.156242 | 13.49143 | 2.58E-36 | 1.49E-34 | 71.58862 |
| PRKCB    | 0.841184 | 5.65728  | 13.45406 | 3.80E-36 | 2.18E-34 | 71.20505 |
| TCL1A    | 1.1808   | 5.239016 | 13.38289 | 7.92E-36 | 4.51E-34 | 70.47603 |
| KIAA0125 | 0.962828 | 4.682209 | 13.36316 | 9.71E-36 | 5.51E-34 | 70.27428 |
| HCP5     | 1.163635 | 7.396144 | 13.31805 | 1.54E-35 | 8.72E-34 | 69.81362 |
| PSAP     | 0.701581 | 11.97065 | 13.30599 | 1.75E-35 | 9.82E-34 | 69.69068 |
| FAM49A   | 0.705293 | 6.227763 | 13.27259 | 2.46E-35 | 1.38E-33 | 69.35035 |
| SELPLG   | 0.822534 | 7.096908 | 13.27121 | 2.50E-35 | 1.39E-33 | 69.33621 |
| IGFLR1   | 0.657824 | 7.488918 | 13.24111 | 3.40E-35 | 1.88E-33 | 69.02996 |
| SAMHD1   | 0.76463  | 8.236121 | 13.211   | 4.63E-35 | 2.55E-33 | 68.72389 |
| ADCY7    | 0.663566 | 6.800824 | 13.1848  | 6.05E-35 | 3.32E-33 | 68.45788 |
| AOAH     | 0.969786 | 6.777379 | 13.17241 | 6.87E-35 | 3.75E-33 | 68.33222 |

|           |          |          |          |          |          |          |
|-----------|----------|----------|----------|----------|----------|----------|
| ALOX5AP   | 1.472606 | 8.579316 | 13.16674 | 7.28E-35 | 3.96E-33 | 68.2747  |
| IRF1      | 0.832871 | 8.185441 | 13.13688 | 9.87E-35 | 5.35E-33 | 67.97212 |
| RUNX3     | 0.835589 | 6.853039 | 13.13257 | 1.03E-34 | 5.56E-33 | 67.92846 |
| PTAFR     | 0.731815 | 6.643397 | 13.13031 | 1.06E-34 | 5.67E-33 | 67.90562 |
| PLA2G7    | 1.299617 | 7.284885 | 13.08054 | 1.75E-34 | 9.37E-33 | 67.4022  |
| PLA2G2D   | 1.281648 | 5.113293 | 13.07167 | 1.92E-34 | 1.02E-32 | 67.3126  |
| P2RY14    | 0.883306 | 6.840744 | 13.05916 | 2.18E-34 | 1.15E-32 | 67.18628 |
| COTL1     | 0.887039 | 8.318114 | 12.99079 | 4.36E-34 | 2.30E-32 | 66.49713 |
| FAS       | 0.811029 | 7.085151 | 12.98566 | 4.60E-34 | 2.41E-32 | 66.44556 |
| TBX21     | 0.597728 | 5.529436 | 12.96055 | 5.93E-34 | 3.10E-32 | 66.19296 |
| IFI44L    | 1.607878 | 8.886971 | 12.95954 | 5.99E-34 | 3.12E-32 | 66.1828  |
| SIT1      | 0.970395 | 5.615921 | 12.95734 | 6.13E-34 | 3.17E-32 | 66.1607  |
| CLIC2     | 1.115816 | 6.722283 | 12.92013 | 8.93E-34 | 4.60E-32 | 65.78704 |
| SYK       | 0.746175 | 6.61529  | 12.91801 | 9.12E-34 | 4.68E-32 | 65.7657  |
| SLAMF1    | 0.876609 | 5.133441 | 12.91176 | 9.71E-34 | 4.97E-32 | 65.70305 |
| DOK2      | 0.829193 | 6.503698 | 12.90637 | 1.03E-33 | 5.22E-32 | 65.64893 |
| RHOG      | 0.614753 | 8.860682 | 12.797   | 3.09E-33 | 1.57E-31 | 64.55469 |
| SERPINB9  | 0.710765 | 6.532165 | 12.79269 | 3.23E-33 | 1.63E-31 | 64.5116  |
| PARP8     | 0.853797 | 6.949741 | 12.7598  | 4.49E-33 | 2.26E-31 | 64.18363 |
| ZBED2     | 1.073191 | 4.782919 | 12.75125 | 4.90E-33 | 2.45E-31 | 64.09843 |
| IL16      | 0.657079 | 6.13015  | 12.71736 | 6.88E-33 | 3.43E-31 | 63.76117 |
| HPSE      | 0.995759 | 5.453117 | 12.71257 | 7.22E-33 | 3.58E-31 | 63.71353 |
| EPHB2     | 0.556606 | 5.804422 | 12.66117 | 1.21E-32 | 5.97E-31 | 63.20293 |
| TLR2      | 1.067154 | 7.582062 | 12.64173 | 1.47E-32 | 7.22E-31 | 63.0101  |
| CCDC69    | 0.835204 | 6.213028 | 12.59045 | 2.45E-32 | 1.19E-30 | 62.50235 |
| APOL6     | 0.865557 | 6.92682  | 12.55564 | 3.46E-32 | 1.68E-30 | 62.1584  |
| KLRD1     | 0.870558 | 4.933373 | 12.49834 | 6.12E-32 | 2.95E-30 | 61.59332 |
| FCN1      | 0.880849 | 5.804245 | 12.49833 | 6.12E-32 | 2.95E-30 | 61.59326 |
| STAP1     | 1.000277 | 4.699849 | 12.4506  | 9.82E-32 | 4.72E-30 | 61.12374 |
| AIM2      | 1.280237 | 6.263361 | 12.41233 | 1.43E-31 | 6.86E-30 | 60.74802 |
| CLEC10A   | 0.848806 | 6.273214 | 12.39382 | 1.72E-31 | 8.21E-30 | 60.56654 |
| PTGDS     | 1.148188 | 8.212446 | 12.37014 | 2.18E-31 | 1.03E-29 | 60.3345  |
| KIF21B    | 1.128096 | 5.076025 | 12.32696 | 3.33E-31 | 1.58E-29 | 59.9123  |
| CTSL      | 0.698114 | 9.75692  | 12.2327  | 8.41E-31 | 3.96E-29 | 58.99347 |
| IL18      | 1.042361 | 6.026139 | 12.2056  | 1.10E-30 | 5.15E-29 | 58.73011 |
| RPS6KA3   | 0.755435 | 7.727269 | 12.18262 | 1.37E-30 | 6.42E-29 | 58.507   |
| HLA-C     | 0.724905 | 12.60462 | 12.14284 | 2.03E-30 | 9.44E-29 | 58.12145 |
| KIAA0226L | 0.785855 | 6.268882 | 12.10755 | 2.86E-30 | 1.33E-28 | 57.78007 |
| CD5       | 0.651819 | 5.837857 | 12.05337 | 4.85E-30 | 2.24E-28 | 57.25701 |
| CD96      | 1.078034 | 5.138617 | 12.01772 | 6.85E-30 | 3.15E-28 | 56.91363 |
| SLCO2B1   | 0.989582 | 6.62974  | 12.00234 | 7.95E-30 | 3.65E-28 | 56.76573 |
| CD1E      | 0.765425 | 5.036696 | 11.98775 | 9.16E-30 | 4.18E-28 | 56.62551 |
| CD69      | 1.221423 | 6.448771 | 11.88979 | 2.36E-29 | 1.07E-27 | 55.68659 |
| IGHM      | 1.997345 | 7.975014 | 11.88877 | 2.39E-29 | 1.08E-27 | 55.67683 |

|          |          |          |          |          |          |          |
|----------|----------|----------|----------|----------|----------|----------|
| CCRL2    | 0.877147 | 5.411484 | 11.86884 | 2.89E-29 | 1.31E-27 | 55.4864  |
| FLI1     | 0.600654 | 5.773134 | 11.83365 | 4.06E-29 | 1.82E-27 | 55.15055 |
| VSIG4    | 0.865693 | 7.911736 | 11.83245 | 4.10E-29 | 1.84E-27 | 55.13918 |
| TOX      | 0.725638 | 4.882574 | 11.80603 | 5.29E-29 | 2.36E-27 | 54.88751 |
| ITGAL    | 0.95259  | 6.482961 | 11.80454 | 5.36E-29 | 2.39E-27 | 54.87332 |
| OVOL2    | -0.54336 | 7.043521 | -11.8015 | 5.52E-29 | 2.45E-27 | 54.84471 |
| CXCR4    | 0.782896 | 9.034791 | 11.78015 | 6.78E-29 | 2.99E-27 | 54.64131 |
| MNDA     | 1.187497 | 7.561543 | 11.7781  | 6.91E-29 | 3.04E-27 | 54.62181 |
| C5AR1    | 0.96115  | 6.558453 | 11.74397 | 9.59E-29 | 4.20E-27 | 54.29765 |
| PLEKHF1  | 0.884968 | 7.017451 | 11.73261 | 1.07E-28 | 4.67E-27 | 54.18989 |
| CTLA4    | 0.690486 | 4.706124 | 11.72525 | 1.15E-28 | 4.99E-27 | 54.12011 |
| AIF1     | 0.816238 | 7.738463 | 11.71376 | 1.28E-28 | 5.55E-27 | 54.01127 |
| SEL1L3   | 1.051726 | 6.590429 | 11.65982 | 2.14E-28 | 9.22E-27 | 53.50092 |
| SP110    | 0.671484 | 8.253479 | 11.59664 | 3.91E-28 | 1.68E-26 | 52.90516 |
| RARRES1  | 1.621038 | 8.085224 | 11.57412 | 4.84E-28 | 2.07E-26 | 52.69321 |
| 6-Sep    | 0.727741 | 6.918112 | 11.526   | 7.63E-28 | 3.24E-26 | 52.24141 |
| ARPC1B   | 0.683998 | 10.57326 | 11.51456 | 8.51E-28 | 3.60E-26 | 52.13408 |
| MARCKS   | 0.639432 | 9.456232 | 11.49972 | 9.79E-28 | 4.12E-26 | 51.99512 |
| PTPN22   | 0.67114  | 4.483579 | 11.49136 | 1.06E-27 | 4.45E-26 | 51.91678 |
| ITM2C    | 0.83406  | 8.354065 | 11.41011 | 2.28E-27 | 9.50E-26 | 51.15795 |
| RGL2     | -0.60513 | 9.320523 | -11.4055 | 2.38E-27 | 9.89E-26 | 51.1146  |
| KIAA0556 | -0.56517 | 7.844217 | -11.3718 | 3.26E-27 | 1.35E-25 | 50.80166 |
| ME2      | 0.800116 | 7.897878 | 11.37124 | 3.28E-27 | 1.35E-25 | 50.79612 |
| CD84     | 0.689672 | 5.745122 | 11.37065 | 3.30E-27 | 1.36E-25 | 50.7906  |
| ITGAM    | 0.730692 | 7.641199 | 11.32713 | 4.96E-27 | 2.03E-25 | 50.38646 |
| APOE     | 0.692795 | 9.554045 | 11.3219  | 5.21E-27 | 2.13E-25 | 50.33798 |
| CD37     | 1.53692  | 6.114857 | 11.31897 | 5.36E-27 | 2.18E-25 | 50.31076 |
| SH3BGRL3 | 0.664088 | 9.550418 | 11.31744 | 5.43E-27 | 2.20E-25 | 50.2966  |
| OAS2     | 0.922362 | 6.922851 | 11.31548 | 5.54E-27 | 2.24E-25 | 50.27841 |
| NAGK     | 0.581778 | 10.04048 | 11.3101  | 5.82E-27 | 2.35E-25 | 50.22854 |
| KDM4B    | -0.67483 | 7.473402 | -11.2931 | 6.82E-27 | 2.74E-25 | 50.07135 |
| MAPT     | -1.12874 | 6.720071 | -11.2382 | 1.14E-26 | 4.56E-25 | 49.56367 |
| CD28     | 0.51616  | 4.537355 | 11.22398 | 1.30E-26 | 5.19E-25 | 49.43252 |
| DLG5     | -0.80062 | 8.168199 | -11.2129 | 1.44E-26 | 5.73E-25 | 49.33036 |
| HHAT     | -0.84595 | 6.640451 | -11.2111 | 1.47E-26 | 5.81E-25 | 49.31385 |
| APOBEC3C | 0.531389 | 7.15226  | 11.18829 | 1.81E-26 | 7.16E-25 | 49.10371 |
| CFLAR    | 0.544311 | 7.42684  | 11.08761 | 4.60E-26 | 1.81E-24 | 48.17994 |
| P2RX7    | 0.711253 | 5.917433 | 11.08258 | 4.82E-26 | 1.89E-24 | 48.13396 |
| RAB8B    | 0.599152 | 7.101873 | 11.03646 | 7.38E-26 | 2.89E-24 | 47.71266 |
| AQP9     | 1.266872 | 5.184195 | 11.03182 | 7.70E-26 | 3.00E-24 | 47.67041 |
| IRS1     | -0.914   | 7.308637 | -11.0315 | 7.72E-26 | 3.00E-24 | 47.66739 |
| SIRPG    | 0.884937 | 4.759387 | 11.01764 | 8.78E-26 | 3.40E-24 | 47.5411  |
| IFI16    | 0.702596 | 9.782539 | 11.00343 | 1.00E-25 | 3.86E-24 | 47.41171 |
| SAMSN1   | 0.869591 | 6.157614 | 10.99308 | 1.10E-25 | 4.23E-24 | 47.31758 |

|          |          |          |          |          |          |          |
|----------|----------|----------|----------|----------|----------|----------|
| PAX5     | 0.676333 | 5.65993  | 10.98007 | 1.24E-25 | 4.75E-24 | 47.19927 |
| EFHC1    | -0.65296 | 7.125399 | -10.9779 | 1.26E-25 | 4.84E-24 | 47.17919 |
| PTGER4   | 0.743872 | 6.864432 | 10.93938 | 1.80E-25 | 6.86E-24 | 46.8298  |
| LIPA     | 0.821505 | 10.23624 | 10.91355 | 2.28E-25 | 8.63E-24 | 46.59573 |
| LY96     | 1.162383 | 8.279378 | 10.88457 | 2.97E-25 | 1.12E-23 | 46.3336  |
| ATP6V1B2 | 0.824185 | 9.206137 | 10.87872 | 3.13E-25 | 1.18E-23 | 46.28073 |
| ADRB2    | 0.792224 | 6.486513 | 10.83618 | 4.62E-25 | 1.73E-23 | 45.89689 |
| MAP3K14  | 0.593374 | 6.128145 | 10.83229 | 4.78E-25 | 1.79E-23 | 45.86187 |
| FLNB     | -0.72013 | 9.520844 | -10.8208 | 5.31E-25 | 1.98E-23 | 45.758   |
| SMCO4    | 0.883662 | 8.674454 | 10.8127  | 5.72E-25 | 2.12E-23 | 45.68547 |
| TLR4     | 0.869206 | 5.980448 | 10.80883 | 5.92E-25 | 2.19E-23 | 45.65062 |
| MFHAS1   | 0.74118  | 7.388941 | 10.80085 | 6.37E-25 | 2.35E-23 | 45.57887 |
| TNF      | 0.854124 | 5.273787 | 10.77213 | 8.26E-25 | 3.04E-23 | 45.32082 |
| PCLO     | -0.71806 | 5.213441 | -10.7706 | 8.37E-25 | 3.07E-23 | 45.30755 |
| CD1D     | 0.873677 | 5.046299 | 10.76376 | 8.91E-25 | 3.26E-23 | 45.24577 |
| C1S      | 1.120193 | 9.823386 | 10.73572 | 1.15E-24 | 4.18E-23 | 44.99441 |
| APOL3    | 0.757096 | 7.569849 | 10.71996 | 1.32E-24 | 4.80E-23 | 44.85332 |
| RSAD2    | 1.222645 | 7.763392 | 10.71663 | 1.37E-24 | 4.94E-23 | 44.82354 |
| PTPN7    | 0.660127 | 5.762142 | 10.7119  | 1.42E-24 | 5.14E-23 | 44.78125 |
| FCGR2B   | 1.38586  | 7.527058 | 10.69668 | 1.63E-24 | 5.88E-23 | 44.64521 |
| RRNAD1   | -0.64055 | 7.257051 | -10.6416 | 2.68E-24 | 9.62E-23 | 44.15405 |
| ST8SIA4  | 0.670472 | 5.493691 | 10.6264  | 3.08E-24 | 1.10E-22 | 44.0187  |
| ZMYND10  | -0.63996 | 5.660713 | -10.6254 | 3.11E-24 | 1.11E-22 | 44.00957 |
| CD40LG   | 0.880151 | 4.645338 | 10.59505 | 4.08E-24 | 1.44E-22 | 43.74017 |
| RAB26    | -0.87559 | 6.920704 | -10.5791 | 4.71E-24 | 1.66E-22 | 43.59869 |
| ARRB2    | 0.932835 | 6.568259 | 10.48233 | 1.12E-23 | 3.93E-22 | 42.74328 |
| IL2RA    | 0.676706 | 5.151479 | 10.48002 | 1.14E-23 | 4.00E-22 | 42.72293 |
| CCL8     | 1.401343 | 7.604182 | 10.46989 | 1.25E-23 | 4.37E-22 | 42.63373 |
| IGLL3P   | 1.259523 | 9.768072 | 10.45819 | 1.38E-23 | 4.83E-22 | 42.53071 |
| STK17A   | 0.60778  | 6.64477  | 10.45059 | 1.48E-23 | 5.15E-22 | 42.46387 |
| DPEP2    | 0.901483 | 4.878161 | 10.43876 | 1.65E-23 | 5.71E-22 | 42.35986 |
| EGFL6    | 1.18421  | 6.54786  | 10.43612 | 1.68E-23 | 5.83E-22 | 42.33672 |
| ASTN2    | -0.67878 | 5.625031 | -10.4346 | 1.71E-23 | 5.89E-22 | 42.32339 |
| DACH1    | -1.684   | 6.860367 | -10.3951 | 2.42E-23 | 8.31E-22 | 41.97655 |
| PIP4K2A  | 0.601689 | 7.431925 | 10.38958 | 2.54E-23 | 8.70E-22 | 41.92843 |
| OAS1     | 0.92285  | 7.811822 | 10.36979 | 3.03E-23 | 1.03E-21 | 41.75526 |
| CD1C     | 0.957339 | 5.984288 | 10.3527  | 3.53E-23 | 1.20E-21 | 41.60579 |
| ATP8B1   | -0.8117  | 8.888248 | -10.3341 | 4.15E-23 | 1.40E-21 | 41.44347 |
| ICAM1    | 0.821498 | 7.000355 | 10.33272 | 4.21E-23 | 1.42E-21 | 41.43135 |
| CACNA1D  | -1.01101 | 6.01591  | -10.3046 | 5.39E-23 | 1.81E-21 | 41.18587 |
| RELB     | 0.64552  | 6.549376 | 10.30425 | 5.40E-23 | 1.81E-21 | 41.18317 |
| ENPP2    | 1.002582 | 8.315384 | 10.30216 | 5.50E-23 | 1.84E-21 | 41.16495 |
| FLVCR2   | 0.652158 | 5.656633 | 10.29763 | 5.73E-23 | 1.91E-21 | 41.12553 |
| IFNG     | 0.901043 | 4.732764 | 10.2902  | 6.12E-23 | 2.03E-21 | 41.06088 |

|          |          |          |          |          |          |          |
|----------|----------|----------|----------|----------|----------|----------|
| GLIPR1   | 0.830178 | 8.068217 | 10.24852 | 8.82E-23 | 2.91E-21 | 40.69878 |
| SPIB     | 0.917051 | 5.220852 | 10.23323 | 1.01E-22 | 3.32E-21 | 40.56614 |
| LCP2     | 0.979199 | 6.548532 | 10.1682  | 1.78E-22 | 5.84E-21 | 40.00383 |
| BLK      | 0.530548 | 4.481943 | 10.16582 | 1.82E-22 | 5.93E-21 | 39.98327 |
| CCL11    | 0.758599 | 5.560795 | 10.16329 | 1.86E-22 | 6.03E-21 | 39.96147 |
| C1R      | 0.727101 | 10.08006 | 10.15517 | 1.99E-22 | 6.45E-21 | 39.89138 |
| MYB      | -1.02324 | 6.872349 | -10.1388 | 2.30E-22 | 7.42E-21 | 39.74995 |
| SLC31A2  | 0.609727 | 7.985464 | 10.12367 | 2.62E-22 | 8.44E-21 | 39.62019 |
| GYPC     | 0.74073  | 8.043856 | 10.10969 | 2.96E-22 | 9.51E-21 | 39.49992 |
| SLC9A6   | 0.599366 | 7.602089 | 10.0993  | 3.24E-22 | 1.04E-20 | 39.41069 |
| ERBB4    | -1.22196 | 6.204085 | -10.0914 | 3.47E-22 | 1.11E-20 | 39.34329 |
| PDCD1LG2 | 0.824373 | 4.479941 | 10.08731 | 3.60E-22 | 1.15E-20 | 39.30777 |
| CCND1    | -1.04875 | 9.543378 | -10.0747 | 4.02E-22 | 1.27E-20 | 39.19936 |
| IRF9     | 0.850929 | 9.0503   | 10.07103 | 4.14E-22 | 1.31E-20 | 39.16815 |
| FXD5     | 0.789276 | 9.203715 | 10.04525 | 5.18E-22 | 1.64E-20 | 38.9474  |
| RAB29    | 0.579322 | 7.392771 | 10.02457 | 6.20E-22 | 1.95E-20 | 38.77057 |
| PLTP     | 0.915969 | 8.314298 | 10.01451 | 6.76E-22 | 2.12E-20 | 38.68474 |
| DRAM1    | 0.582665 | 8.043196 | 10.0049  | 7.34E-22 | 2.29E-20 | 38.60271 |
| LGMN     | 0.845017 | 9.833427 | 9.956423 | 1.11E-21 | 3.47E-20 | 38.18984 |
| P2RY6    | 0.683188 | 6.411158 | 9.948785 | 1.19E-21 | 3.70E-20 | 38.12491 |
| IL15     | 0.70774  | 5.6687   | 9.919854 | 1.53E-21 | 4.73E-20 | 37.87934 |
| NEDD4L   | -0.79257 | 7.269003 | -9.91393 | 1.61E-21 | 4.96E-20 | 37.82915 |
| CSPP1    | -0.55454 | 6.455561 | -9.87243 | 2.29E-21 | 7.05E-20 | 37.47793 |
| MMP9     | 1.280575 | 9.195613 | 9.864776 | 2.45E-21 | 7.50E-20 | 37.41323 |
| KIAA0895 | -0.80925 | 6.053871 | -9.86185 | 2.51E-21 | 7.67E-20 | 37.38856 |
| IGLJ3    | 1.671249 | 7.400054 | 9.846917 | 2.85E-21 | 8.69E-20 | 37.26249 |
| LIMD2    | 1.016412 | 5.398586 | 9.82526  | 3.43E-21 | 1.04E-19 | 37.07996 |
| MAGED2   | -0.68782 | 9.723465 | -9.82478 | 3.44E-21 | 1.04E-19 | 37.07589 |
| MALT1    | 0.568113 | 6.790268 | 9.808569 | 3.95E-21 | 1.20E-19 | 36.93948 |
| TRIM45   | -0.69102 | 6.878089 | -9.80298 | 4.14E-21 | 1.25E-19 | 36.89244 |
| LRRC8E   | -0.60733 | 6.42579  | -9.79827 | 4.31E-21 | 1.30E-19 | 36.85287 |
| PNRC1    | 0.699859 | 9.82703  | 9.795634 | 4.41E-21 | 1.33E-19 | 36.83073 |
| KCNAB2   | 0.541981 | 5.94592  | 9.789879 | 4.63E-21 | 1.39E-19 | 36.78238 |
| FAAH     | -0.6927  | 6.711078 | -9.78713 | 4.74E-21 | 1.41E-19 | 36.75927 |
| ZNF587B  | -0.64162 | 8.403257 | -9.77927 | 5.07E-21 | 1.51E-19 | 36.69332 |
| IKZF3    | 0.843273 | 5.103238 | 9.762277 | 5.85E-21 | 1.74E-19 | 36.55075 |
| TRAF1    | 0.560502 | 5.374989 | 9.752417 | 6.36E-21 | 1.88E-19 | 36.46812 |
| ITGB7    | 0.858447 | 6.273489 | 9.749696 | 6.51E-21 | 1.92E-19 | 36.44533 |
| SGPP1    | 0.70515  | 6.88505  | 9.732382 | 7.54E-21 | 2.22E-19 | 36.30041 |
| KIAA0232 | -0.6551  | 8.28808  | -9.73008 | 7.69E-21 | 2.26E-19 | 36.28113 |
| STC2     | -1.4166  | 8.093765 | -9.64179 | 1.62E-20 | 4.74E-19 | 35.5452  |
| APOBEC3G | 0.844839 | 6.577476 | 9.636888 | 1.69E-20 | 4.92E-19 | 35.50449 |
| PHACTR1  | 0.514436 | 5.144699 | 9.627326 | 1.83E-20 | 5.32E-19 | 35.42511 |
| CHIT1    | 1.049594 | 5.163226 | 9.62038  | 1.94E-20 | 5.63E-19 | 35.36748 |

|          |          |          |          |          |          |          |
|----------|----------|----------|----------|----------|----------|----------|
| CELF2    | 0.597008 | 7.087281 | 9.618661 | 1.97E-20 | 5.70E-19 | 35.35321 |
| SPEF1    | -0.55364 | 5.938259 | -9.61254 | 2.07E-20 | 5.98E-19 | 35.30245 |
| UBE2L6   | 0.653173 | 9.952229 | 9.60869  | 2.14E-20 | 6.16E-19 | 35.27055 |
| TMEM176A | 0.783925 | 8.939823 | 9.597152 | 2.35E-20 | 6.77E-19 | 35.17497 |
| ELOVL2   | -1.06754 | 5.67572  | -9.58244 | 2.66E-20 | 7.64E-19 | 35.05321 |
| SECTM1   | 0.696762 | 7.659016 | 9.563078 | 3.13E-20 | 8.97E-19 | 34.8932  |
| CCR5     | 1.197206 | 7.556884 | 9.560982 | 3.19E-20 | 9.10E-19 | 34.87589 |
| IL10RB   | 0.596417 | 8.043628 | 9.560236 | 3.21E-20 | 9.14E-19 | 34.86973 |
| HSD11B1  | 0.756646 | 5.969453 | 9.557696 | 3.28E-20 | 9.31E-19 | 34.84876 |
| MAST4    | -0.65457 | 7.154633 | -9.54837 | 3.54E-20 | 1.00E-18 | 34.7718  |
| TIGD6    | -0.73317 | 4.32891  | -9.54265 | 3.71E-20 | 1.05E-18 | 34.72459 |
| CD300A   | 0.584807 | 5.474948 | 9.529663 | 4.14E-20 | 1.17E-18 | 34.61758 |
| IRX5     | -0.82755 | 9.133433 | -9.52469 | 4.31E-20 | 1.21E-18 | 34.57667 |
| IFI27    | 1.141515 | 10.35457 | 9.494641 | 5.54E-20 | 1.56E-18 | 34.32947 |
| IFT140   | -0.52484 | 5.563155 | -9.49093 | 5.71E-20 | 1.60E-18 | 34.29901 |
| GBP2     | 0.666696 | 8.818895 | 9.467177 | 6.96E-20 | 1.94E-18 | 34.10408 |
| SEMA3F   | -0.56281 | 7.176694 | -9.45458 | 7.73E-20 | 2.15E-18 | 34.00083 |
| MZB1     | 1.051813 | 7.340408 | 9.453604 | 7.79E-20 | 2.16E-18 | 33.99286 |
| FMO5     | -0.91279 | 5.434598 | -9.38537 | 1.37E-19 | 3.79E-18 | 33.43555 |
| CCL21    | 1.034266 | 6.549081 | 9.378692 | 1.45E-19 | 3.99E-18 | 33.38116 |
| AGBL2    | -0.69516 | 4.835022 | -9.37564 | 1.48E-19 | 4.08E-18 | 33.35634 |
| AKR7A3   | -0.79752 | 7.986906 | -9.35625 | 1.74E-19 | 4.78E-18 | 33.19864 |
| MARCO    | 1.124456 | 5.287798 | 9.342913 | 1.94E-19 | 5.32E-18 | 33.09027 |
| LAP3     | 0.728705 | 10.41726 | 9.325899 | 2.23E-19 | 6.11E-18 | 32.95223 |
| ZNF606   | -0.54604 | 7.015331 | -9.30331 | 2.69E-19 | 7.33E-18 | 32.76923 |
| ERBB3    | -0.55506 | 7.316523 | -9.25248 | 4.08E-19 | 1.11E-17 | 32.35867 |
| CLSTN2   | -1.34242 | 6.824158 | -9.2308  | 4.86E-19 | 1.32E-17 | 32.1841  |
| FAM63A   | -0.72378 | 8.652428 | -9.2183  | 5.39E-19 | 1.45E-17 | 32.08358 |
| TNFAIP8  | 0.760719 | 7.510889 | 9.217987 | 5.40E-19 | 1.45E-17 | 32.08107 |
| APOL1    | 0.709831 | 7.303695 | 9.203219 | 6.09E-19 | 1.63E-17 | 31.96244 |
| DZANK1   | -0.65663 | 5.77918  | -9.18253 | 7.20E-19 | 1.92E-17 | 31.79645 |
| PLXNC1   | 0.543143 | 6.953429 | 9.17744  | 7.51E-19 | 2.00E-17 | 31.75569 |
| FOLR2    | 0.653393 | 6.549024 | 9.170517 | 7.94E-19 | 2.11E-17 | 31.70024 |
| KRT8     | -0.83822 | 11.02682 | -9.16657 | 8.20E-19 | 2.17E-17 | 31.66864 |
| LAMB2    | -0.77368 | 8.948108 | -9.16367 | 8.39E-19 | 2.22E-17 | 31.64546 |
| FAM174B  | -0.82025 | 7.9194   | -9.16284 | 8.45E-19 | 2.23E-17 | 31.63881 |
| KLRG1    | 0.876644 | 5.75025  | 9.160582 | 8.61E-19 | 2.26E-17 | 31.62072 |
| ISG20    | 0.891059 | 8.189343 | 9.157695 | 8.81E-19 | 2.31E-17 | 31.59763 |
| SLC19A2  | -0.96547 | 8.687517 | -9.15738 | 8.83E-19 | 2.31E-17 | 31.59511 |
| INPP5D   | 0.814866 | 5.787248 | 9.15421  | 9.06E-19 | 2.37E-17 | 31.56975 |
| MMP16    | -0.50685 | 4.973092 | -9.13253 | 1.08E-18 | 2.82E-17 | 31.39652 |
| TAP2     | 0.630781 | 5.950824 | 9.132232 | 1.08E-18 | 2.82E-17 | 31.39417 |
| C11orf21 | 0.550321 | 5.100962 | 9.121792 | 1.18E-18 | 3.06E-17 | 31.31088 |
| IL1R2    | 0.73871  | 4.947157 | 9.108155 | 1.32E-18 | 3.40E-17 | 31.20218 |

|            |          |          |          |          |          |          |
|------------|----------|----------|----------|----------|----------|----------|
| JUP        | -0.56918 | 9.641677 | -9.0966  | 1.44E-18 | 3.72E-17 | 31.11016 |
| RASGRP1    | 0.895535 | 7.477232 | 9.087104 | 1.56E-18 | 4.01E-17 | 31.03463 |
| DNAJC12    | -1.35418 | 7.63508  | -9.06547 | 1.86E-18 | 4.76E-17 | 30.86273 |
| JAK2       | 0.568431 | 5.874825 | 9.059888 | 1.94E-18 | 4.96E-17 | 30.81844 |
| CD33       | 0.810044 | 5.337465 | 9.046584 | 2.16E-18 | 5.51E-17 | 30.71294 |
| ELMO1      | 0.684619 | 6.61512  | 9.039531 | 2.29E-18 | 5.82E-17 | 30.65706 |
| ABCA3      | -0.70373 | 7.36499  | -9.03629 | 2.35E-18 | 5.96E-17 | 30.63138 |
| NFKB1      | 0.544534 | 8.336646 | 9.035777 | 2.36E-18 | 5.97E-17 | 30.62733 |
| FGFR3      | -0.78548 | 5.794196 | -9.02049 | 2.66E-18 | 6.72E-17 | 30.50637 |
| RNF43      | -0.77309 | 6.894295 | -8.98747 | 3.47E-18 | 8.72E-17 | 30.24557 |
| THSD4      | -0.91675 | 5.675904 | -8.98683 | 3.49E-18 | 8.74E-17 | 30.24056 |
| HLA-J      | 1.031172 | 10.3547  | 8.979678 | 3.69E-18 | 9.22E-17 | 30.18415 |
| LAMA5      | -0.65494 | 8.292193 | -8.97527 | 3.82E-18 | 9.53E-17 | 30.14942 |
| MILR1      | 0.613459 | 5.308711 | 8.973065 | 3.89E-18 | 9.68E-17 | 30.13205 |
| USP18      | 0.710238 | 7.350474 | 8.959889 | 4.32E-18 | 1.07E-16 | 30.02832 |
| GATA3      | -1.36119 | 10.4147  | -8.95943 | 4.34E-18 | 1.07E-16 | 30.02469 |
| TRIM21     | 0.537993 | 7.308346 | 8.952121 | 4.60E-18 | 1.14E-16 | 29.96722 |
| PTOV1      | -0.50559 | 9.021933 | -8.95132 | 4.63E-18 | 1.14E-16 | 29.96094 |
| VPREB3     | 0.577317 | 5.265812 | 8.944404 | 4.89E-18 | 1.20E-16 | 29.90656 |
| KCND3      | -0.59362 | 4.97647  | -8.9435  | 4.93E-18 | 1.21E-16 | 29.89943 |
| VCAM1      | 0.980051 | 8.92874  | 8.932404 | 5.38E-18 | 1.32E-16 | 29.81231 |
| RTP4       | 1.037246 | 7.049217 | 8.930368 | 5.47E-18 | 1.34E-16 | 29.79633 |
| FASLG      | 0.555264 | 4.83097  | 8.924134 | 5.75E-18 | 1.40E-16 | 29.74742 |
| ABAT       | -0.92908 | 7.294141 | -8.92155 | 5.86E-18 | 1.43E-16 | 29.72716 |
| PRDM1      | 0.741448 | 6.699525 | 8.917611 | 6.05E-18 | 1.47E-16 | 29.69627 |
| OASL       | 0.788834 | 6.782762 | 8.917405 | 6.06E-18 | 1.47E-16 | 29.69465 |
| NFE2L3     | 0.680044 | 6.329605 | 8.913839 | 6.24E-18 | 1.51E-16 | 29.6667  |
| KIAA1107   | -0.5065  | 5.458963 | -8.91166 | 6.34E-18 | 1.53E-16 | 29.64961 |
| C10orf10   | 0.605822 | 7.802361 | 8.899268 | 7.00E-18 | 1.68E-16 | 29.55257 |
| CEP83      | -0.50049 | 5.683326 | -8.8928  | 7.37E-18 | 1.76E-16 | 29.50197 |
| ZNF587     | -0.64411 | 8.692127 | -8.8662  | 9.10E-18 | 2.15E-16 | 29.29408 |
| IFIT3      | 1.101591 | 8.440376 | 8.866132 | 9.10E-18 | 2.15E-16 | 29.29356 |
| OLR1       | 1.110674 | 6.311515 | 8.864309 | 9.23E-18 | 2.18E-16 | 29.27933 |
| LAIR2      | 0.504917 | 5.912622 | 8.863212 | 9.31E-18 | 2.19E-16 | 29.27077 |
| PLAUR      | 0.570497 | 7.575153 | 8.845001 | 1.08E-17 | 2.52E-16 | 29.12878 |
| SDC4       | -0.58399 | 10.45082 | -8.82992 | 1.21E-17 | 2.84E-16 | 29.01138 |
| CASZ1      | -0.57291 | 6.762707 | -8.80453 | 1.48E-17 | 3.44E-16 | 28.81401 |
| IFI44      | 0.817998 | 7.365636 | 8.79544  | 1.59E-17 | 3.69E-16 | 28.74346 |
| MAST1      | 0.623394 | 4.365393 | 8.769529 | 1.95E-17 | 4.49E-16 | 28.54267 |
| STAG3      | 0.586325 | 5.485549 | 8.76914  | 1.95E-17 | 4.50E-16 | 28.53966 |
| PYHIN1     | 0.555012 | 5.058842 | 8.765577 | 2.01E-17 | 4.62E-16 | 28.51209 |
| ST6GALNAC2 | -0.95217 | 8.133598 | -8.7633  | 2.05E-17 | 4.69E-16 | 28.49444 |
| TNFSF14    | 0.563093 | 4.712529 | 8.760906 | 2.09E-17 | 4.77E-16 | 28.47595 |
| PRKX       | 0.703125 | 6.652168 | 8.743394 | 2.39E-17 | 5.45E-16 | 28.34061 |

|          |          |          |          |          |          |          |
|----------|----------|----------|----------|----------|----------|----------|
| PLA1A    | 0.742366 | 5.201216 | 8.740284 | 2.45E-17 | 5.58E-16 | 28.3166  |
| ARNTL2   | 0.845788 | 5.459252 | 8.736481 | 2.53E-17 | 5.73E-16 | 28.28724 |
| IL18R1   | 0.617355 | 4.944204 | 8.726438 | 2.73E-17 | 6.18E-16 | 28.20976 |
| POLI     | -0.62366 | 7.04843  | -8.72334 | 2.80E-17 | 6.32E-16 | 28.1859  |
| P4HTM    | -0.68085 | 8.60651  | -8.70117 | 3.33E-17 | 7.49E-16 | 28.01515 |
| HLA-DQB2 | 0.835968 | 7.059134 | 8.700378 | 3.35E-17 | 7.52E-16 | 28.00904 |
| XAF1     | 0.764924 | 7.9887   | 8.685278 | 3.77E-17 | 8.43E-16 | 27.89295 |
| ARHGAP32 | -0.86682 | 7.273874 | -8.6689  | 4.28E-17 | 9.54E-16 | 27.76719 |
| FBXW4    | -0.5295  | 8.752695 | -8.66588 | 4.38E-17 | 9.75E-16 | 27.74401 |
| ZNF500   | -0.54963 | 6.692638 | -8.66512 | 4.41E-17 | 9.79E-16 | 27.73821 |
| IL18RAP  | 0.590357 | 5.189676 | 8.658025 | 4.66E-17 | 1.03E-15 | 27.68382 |
| LSP1     | 0.523001 | 7.633699 | 8.614665 | 6.52E-17 | 1.43E-15 | 27.35212 |
| HK3      | 0.748709 | 5.062635 | 8.613408 | 6.58E-17 | 1.44E-15 | 27.34253 |
| SLC39A6  | -0.97813 | 10.36094 | -8.59491 | 7.60E-17 | 1.66E-15 | 27.20143 |
| PSMB8    | 0.952142 | 9.042488 | 8.593704 | 7.67E-17 | 1.67E-15 | 27.19225 |
| LRP2     | -1.29924 | 6.727776 | -8.57958 | 8.55E-17 | 1.86E-15 | 27.08466 |
| RNF19B   | 0.956385 | 6.980945 | 8.5662   | 9.48E-17 | 2.06E-15 | 26.98292 |
| TLR8     | 0.87393  | 4.601072 | 8.560838 | 9.88E-17 | 2.14E-15 | 26.94216 |
| BCL11A   | 0.960395 | 6.598435 | 8.557922 | 1.01E-16 | 2.18E-15 | 26.92001 |
| EBI3     | 0.570978 | 5.237621 | 8.536499 | 1.19E-16 | 2.57E-15 | 26.75745 |
| ODC1     | 0.767327 | 9.236884 | 8.533514 | 1.22E-16 | 2.63E-15 | 26.73483 |
| WIPF1    | 0.797093 | 7.515518 | 8.512891 | 1.43E-16 | 3.07E-15 | 26.57867 |
| RAB33A   | 0.531282 | 4.992919 | 8.511696 | 1.44E-16 | 3.09E-15 | 26.56963 |
| SHANK2   | -0.5698  | 6.403834 | -8.47639 | 1.89E-16 | 4.03E-15 | 26.30304 |
| TFF3     | -1.62947 | 9.011572 | -8.47219 | 1.95E-16 | 4.15E-15 | 26.27136 |
| ADAM28   | 0.582437 | 5.480543 | 8.471158 | 1.97E-16 | 4.18E-15 | 26.26358 |
| C5orf30  | -0.87473 | 7.941355 | -8.4702  | 1.98E-16 | 4.20E-15 | 26.25637 |
| PPP1R13B | -0.53834 | 7.475697 | -8.46912 | 2.00E-16 | 4.23E-15 | 26.24823 |
| SOAT1    | 0.762311 | 6.992984 | 8.464129 | 2.08E-16 | 4.38E-15 | 26.21063 |
| GLI3     | -0.64765 | 7.77984  | -8.46394 | 2.08E-16 | 4.38E-15 | 26.20919 |
| ZNF223   | -0.66468 | 5.461581 | -8.46092 | 2.13E-16 | 4.47E-15 | 26.18646 |
| DYNC2LI1 | -0.55814 | 6.38083  | -8.44781 | 2.35E-16 | 4.92E-15 | 26.08785 |
| MYO5C    | -0.77971 | 9.195867 | -8.44313 | 2.44E-16 | 5.09E-15 | 26.05262 |
| ATP6V0D1 | 0.535596 | 9.83224  | 8.436215 | 2.57E-16 | 5.36E-15 | 26.00068 |
| FAM134B  | -0.53257 | 5.682484 | -8.42335 | 2.83E-16 | 5.90E-15 | 25.90413 |
| HPCAL1   | 0.559047 | 7.631541 | 8.414735 | 3.03E-16 | 6.29E-15 | 25.8395  |
| WDR78    | -0.53634 | 4.972174 | -8.41449 | 3.03E-16 | 6.29E-15 | 25.83766 |
| TRANK1   | 0.67075  | 6.363373 | 8.410091 | 3.14E-16 | 6.49E-15 | 25.80469 |
| SERPING1 | 0.717272 | 10.08071 | 8.394331 | 3.53E-16 | 7.30E-15 | 25.68669 |
| CRELD1   | -0.50206 | 6.814611 | -8.39089 | 3.63E-16 | 7.47E-15 | 25.66093 |
| ESR1     | -0.6087  | 5.46107  | -8.3888  | 3.69E-16 | 7.57E-15 | 25.64533 |
| NR1H3    | 0.592669 | 7.369547 | 8.377153 | 4.03E-16 | 8.22E-15 | 25.55827 |
| IQCK     | -0.51062 | 6.418108 | -8.36916 | 4.28E-16 | 8.69E-15 | 25.49856 |
| RBMS1    | 0.558116 | 9.497623 | 8.368488 | 4.30E-16 | 8.72E-15 | 25.49357 |

|          |          |          |          |          |          |          |
|----------|----------|----------|----------|----------|----------|----------|
| CCDC121  | -0.63498 | 4.94505  | -8.36223 | 4.51E-16 | 9.13E-15 | 25.44687 |
| CD1B     | 0.606864 | 4.141226 | 8.35671  | 4.70E-16 | 9.50E-15 | 25.4057  |
| LRBA     | -0.54353 | 8.929102 | -8.35556 | 4.74E-16 | 9.57E-15 | 25.39712 |
| TM6SF1   | 0.545358 | 6.716347 | 8.340425 | 5.32E-16 | 1.07E-14 | 25.28437 |
| ELF4     | 0.623446 | 7.084041 | 8.337459 | 5.44E-16 | 1.09E-14 | 25.2623  |
| ME1      | 0.617219 | 6.237818 | 8.335859 | 5.50E-16 | 1.11E-14 | 25.2504  |
| TAPBPL   | 0.501353 | 7.632666 | 8.329033 | 5.79E-16 | 1.16E-14 | 25.19962 |
| C3       | 0.856269 | 11.45328 | 8.31787  | 6.30E-16 | 1.26E-14 | 25.11665 |
| HLA-DOA  | 0.500427 | 5.643125 | 8.315397 | 6.42E-16 | 1.28E-14 | 25.09828 |
| CELSR2   | -0.66561 | 7.743583 | -8.31035 | 6.67E-16 | 1.33E-14 | 25.06083 |
| IL1B     | 0.623429 | 6.385828 | 8.302065 | 7.10E-16 | 1.41E-14 | 24.99933 |
| EVI2A    | 0.921629 | 7.87693  | 8.280928 | 8.33E-16 | 1.65E-14 | 24.84271 |
| LILRB5   | 0.613553 | 4.870514 | 8.277383 | 8.55E-16 | 1.69E-14 | 24.81647 |
| TBC1D9   | -0.89945 | 9.211928 | -8.25542 | 1.01E-15 | 1.98E-14 | 24.65413 |
| SAMD9    | 0.721803 | 7.026845 | 8.255203 | 1.01E-15 | 1.98E-14 | 24.65251 |
| VNN2     | 0.805751 | 4.844785 | 8.254422 | 1.02E-15 | 1.99E-14 | 24.64675 |
| SREBF1   | -0.6274  | 7.747455 | -8.24541 | 1.09E-15 | 2.13E-14 | 24.58021 |
| ASCC3    | 0.505526 | 7.454452 | 8.238519 | 1.14E-15 | 2.23E-14 | 24.52941 |
| PPP1R9A  | -0.56856 | 6.410426 | -8.22072 | 1.31E-15 | 2.54E-14 | 24.39827 |
| CCL4     | 1.085261 | 7.374806 | 8.220333 | 1.31E-15 | 2.55E-14 | 24.39545 |
| S100A9   | 1.454122 | 8.35662  | 8.219621 | 1.32E-15 | 2.56E-14 | 24.39021 |
| NSUN7    | -0.53887 | 4.766377 | -8.20321 | 1.49E-15 | 2.88E-14 | 24.26952 |
| SLC1A2   | -0.71482 | 4.95263  | -8.20309 | 1.49E-15 | 2.88E-14 | 24.26869 |
| RIPPLY3  | -0.66823 | 5.091476 | -8.19915 | 1.54E-15 | 2.96E-14 | 24.23971 |
| IER3     | -0.69313 | 11.14124 | -8.19593 | 1.57E-15 | 3.02E-14 | 24.2161  |
| SERPINF1 | 0.666009 | 10.65813 | 8.194932 | 1.59E-15 | 3.04E-14 | 24.20874 |
| RHOF     | 0.58105  | 6.195498 | 8.194207 | 1.59E-15 | 3.05E-14 | 24.20342 |
| LRRC6    | -0.70148 | 6.422854 | -8.17904 | 1.78E-15 | 3.39E-14 | 24.09217 |
| DDX58    | 0.561017 | 7.673387 | 8.176366 | 1.82E-15 | 3.45E-14 | 24.07256 |
| DUSP2    | 0.696487 | 6.222316 | 8.172783 | 1.87E-15 | 3.54E-14 | 24.0463  |
| SLC4A8   | -0.8033  | 5.679002 | -8.17014 | 1.91E-15 | 3.60E-14 | 24.02693 |
| MRPS30   | -0.70834 | 8.473792 | -8.1545  | 2.14E-15 | 4.04E-14 | 23.91249 |
| MAL      | 0.531059 | 5.43716  | 8.126174 | 2.64E-15 | 4.95E-14 | 23.70563 |
| LILRA3   | 0.527216 | 4.212113 | 8.115322 | 2.86E-15 | 5.36E-14 | 23.62654 |
| NOTCH2NL | -0.591   | 11.44167 | -8.09933 | 3.22E-15 | 6.01E-14 | 23.51011 |
| GFRA1    | -1.30484 | 6.687957 | -8.09751 | 3.27E-15 | 6.08E-14 | 23.49691 |
| CHST7    | 0.610204 | 5.478688 | 8.091212 | 3.42E-15 | 6.35E-14 | 23.45111 |
| CA12     | -1.07314 | 8.584319 | -8.07738 | 3.79E-15 | 6.98E-14 | 23.35068 |
| TNFSF8   | 0.542478 | 5.547281 | 8.064183 | 4.18E-15 | 7.66E-14 | 23.25494 |
| DYNC2H1  | -0.55606 | 5.837378 | -8.06125 | 4.27E-15 | 7.81E-14 | 23.23369 |
| RNASE2   | 0.632981 | 5.262287 | 8.054429 | 4.49E-15 | 8.19E-14 | 23.18427 |
| ACP5     | 0.690985 | 8.140405 | 8.048731 | 4.68E-15 | 8.53E-14 | 23.14303 |
| HERC5    | 0.831589 | 7.418406 | 8.04277  | 4.89E-15 | 8.90E-14 | 23.0999  |
| MYO6     | -0.64015 | 8.939239 | -8.02569 | 5.54E-15 | 1.01E-13 | 22.97647 |

|          |          |          |          |          |          |          |
|----------|----------|----------|----------|----------|----------|----------|
| GLRB     | -0.76169 | 5.321444 | -8.02158 | 5.71E-15 | 1.03E-13 | 22.9468  |
| IGSF6    | 0.59817  | 6.573826 | 8.015636 | 5.97E-15 | 1.08E-13 | 22.90391 |
| MX1      | 0.986697 | 9.684253 | 8.00224  | 6.58E-15 | 1.19E-13 | 22.80735 |
| NRBF2    | 0.567836 | 7.405778 | 7.995404 | 6.92E-15 | 1.25E-13 | 22.75813 |
| PAF1     | -0.60106 | 8.049607 | -7.9877  | 7.32E-15 | 1.32E-13 | 22.70267 |
| KCNA3    | 0.602365 | 4.602734 | 7.987555 | 7.33E-15 | 1.32E-13 | 22.70164 |
| CLUL1    | -0.5984  | 5.268554 | -7.98706 | 7.36E-15 | 1.32E-13 | 22.69809 |
| KIR2DS5  | 0.583723 | 4.387889 | 7.980221 | 7.74E-15 | 1.38E-13 | 22.64891 |
| C14orf79 | -0.61271 | 6.50893  | -7.97945 | 7.78E-15 | 1.39E-13 | 22.64335 |
| ATP8B4   | 0.623526 | 4.85657  | 7.979177 | 7.79E-15 | 1.39E-13 | 22.64141 |
| RPGR     | -0.62428 | 6.151939 | -7.9679  | 8.46E-15 | 1.51E-13 | 22.56038 |
| REPS2    | -0.747   | 6.535091 | -7.96603 | 8.58E-15 | 1.52E-13 | 22.54698 |
| MAGI2    | -0.58818 | 5.244665 | -7.96458 | 8.67E-15 | 1.54E-13 | 22.53658 |
| DDX60    | 0.785799 | 8.230809 | 7.954596 | 9.33E-15 | 1.65E-13 | 22.46497 |
| CCL20    | 0.929902 | 4.543353 | 7.952689 | 9.46E-15 | 1.67E-13 | 22.4513  |
| NME3     | -0.85168 | 8.931653 | -7.94014 | 1.04E-14 | 1.83E-13 | 22.36142 |
| ZFYVE16  | -0.55713 | 6.776244 | -7.93954 | 1.04E-14 | 1.83E-13 | 22.35712 |
| ENO2     | -0.72663 | 6.945098 | -7.93371 | 1.09E-14 | 1.91E-13 | 22.31539 |
| DOCK2    | 0.646921 | 6.188774 | 7.925877 | 1.15E-14 | 2.01E-13 | 22.25938 |
| GPX7     | 0.635904 | 7.665777 | 7.924077 | 1.16E-14 | 2.03E-13 | 22.24652 |
| RBM39    | -0.5227  | 9.722751 | -7.91941 | 1.20E-14 | 2.10E-13 | 22.21319 |
| LUC7L3   | -0.58829 | 8.893184 | -7.90898 | 1.30E-14 | 2.25E-13 | 22.13867 |
| CHST11   | 0.868408 | 7.146263 | 7.902199 | 1.36E-14 | 2.36E-13 | 22.09033 |
| TBX3     | -0.81082 | 6.730377 | -7.89968 | 1.39E-14 | 2.40E-13 | 22.07238 |
| UCN      | -0.89304 | 5.463488 | -7.88581 | 1.54E-14 | 2.65E-13 | 21.97355 |
| FMO1     | 0.863123 | 7.157991 | 7.865903 | 1.78E-14 | 3.05E-13 | 21.83199 |
| KIF16B   | -0.5221  | 7.408785 | -7.85068 | 1.98E-14 | 3.40E-13 | 21.72394 |
| HMOX1    | 0.620349 | 8.143358 | 7.846929 | 2.04E-14 | 3.49E-13 | 21.69732 |
| NOD2     | 0.567671 | 6.142136 | 7.845368 | 2.06E-14 | 3.52E-13 | 21.68625 |
| SYCP2    | -0.74864 | 5.437829 | -7.8445  | 2.07E-14 | 3.54E-13 | 21.68011 |
| CCDC170  | -0.67453 | 5.6483   | -7.84349 | 2.09E-14 | 3.56E-13 | 21.67291 |
| ALDH1A1  | 0.903745 | 7.156802 | 7.813219 | 2.59E-14 | 4.38E-13 | 21.45871 |
| WDR60    | -0.51138 | 5.802135 | -7.80524 | 2.75E-14 | 4.61E-13 | 21.40232 |
| COL4A5   | -0.80849 | 6.788243 | -7.79584 | 2.94E-14 | 4.92E-13 | 21.336   |
| SLC43A3  | 0.77388  | 7.968901 | 7.783638 | 3.21E-14 | 5.36E-13 | 21.25002 |
| LCMT1    | -0.50329 | 9.247036 | -7.7749  | 3.42E-14 | 5.69E-13 | 21.18846 |
| CD200    | 0.517901 | 6.893425 | 7.767675 | 3.60E-14 | 5.98E-13 | 21.13766 |
| PBLD     | -0.5005  | 5.916819 | -7.76242 | 3.73E-14 | 6.20E-13 | 21.10071 |
| ATP2C2   | -0.54333 | 6.26424  | -7.75056 | 4.07E-14 | 6.71E-13 | 21.01741 |
| PRNP     | 0.557707 | 9.024242 | 7.749448 | 4.10E-14 | 6.75E-13 | 21.0096  |
| KRT18    | -0.70971 | 11.90498 | -7.74408 | 4.26E-14 | 7.00E-13 | 20.97196 |
| S1PR1    | 0.536903 | 6.646851 | 7.741879 | 4.33E-14 | 7.10E-13 | 20.95649 |
| DNALI1   | -0.99055 | 6.597496 | -7.73761 | 4.46E-14 | 7.31E-13 | 20.92658 |
| ENTPD1   | 0.647815 | 7.373242 | 7.734219 | 4.57E-14 | 7.48E-13 | 20.9028  |

|           |          |          |          |          |          |          |
|-----------|----------|----------|----------|----------|----------|----------|
| CD4       | 0.552301 | 5.503996 | 7.722294 | 4.97E-14 | 8.13E-13 | 20.81928 |
| SPN       | 0.518569 | 4.738928 | 7.707072 | 5.54E-14 | 9.04E-13 | 20.71282 |
| LY6E      | 0.703746 | 9.416323 | 7.699593 | 5.84E-14 | 9.49E-13 | 20.66059 |
| KCNJ3     | -0.96757 | 4.417163 | -7.69717 | 5.95E-14 | 9.63E-13 | 20.64365 |
| PAFAH1B3  | -0.51832 | 9.152935 | -7.6956  | 6.01E-14 | 9.72E-13 | 20.63273 |
| GPNMB     | 0.678736 | 10.4162  | 7.694471 | 6.06E-14 | 9.79E-13 | 20.62483 |
| PFN1      | 0.589777 | 11.01893 | 7.693582 | 6.10E-14 | 9.84E-13 | 20.61863 |
| ATP6V0E2  | -0.53486 | 8.984904 | -7.69061 | 6.23E-14 | 1.00E-12 | 20.59788 |
| TNFRSF21  | 0.67316  | 7.49447  | 7.689979 | 6.26E-14 | 1.01E-12 | 20.59349 |
| IGLL1     | 0.552537 | 5.326669 | 7.688436 | 6.33E-14 | 1.02E-12 | 20.58273 |
| UCP2      | 0.564505 | 9.460369 | 7.677588 | 6.83E-14 | 1.10E-12 | 20.50712 |
| PNP       | 0.627253 | 8.210106 | 7.666365 | 7.40E-14 | 1.19E-12 | 20.42898 |
| PSAT1     | 0.935346 | 6.38702  | 7.665127 | 7.46E-14 | 1.19E-12 | 20.42038 |
| DOCK10    | 0.72448  | 5.902218 | 7.656008 | 7.96E-14 | 1.27E-12 | 20.35697 |
| GRAP2     | 0.557368 | 4.612652 | 7.655775 | 7.97E-14 | 1.27E-12 | 20.35535 |
| KYNU      | 0.750753 | 6.124009 | 7.638292 | 9.02E-14 | 1.44E-12 | 20.23395 |
| CD7       | 0.701393 | 5.328721 | 7.633295 | 9.35E-14 | 1.49E-12 | 20.1993  |
| RENBP     | 0.545348 | 4.878682 | 7.623055 | 1.00E-13 | 1.59E-12 | 20.12834 |
| IQCH      | -0.51133 | 3.945333 | -7.61897 | 1.03E-13 | 1.63E-12 | 20.10004 |
| IFIH1     | 0.568703 | 5.791478 | 7.616676 | 1.05E-13 | 1.65E-12 | 20.08418 |
| KLRF1     | 0.689853 | 4.279611 | 7.612503 | 1.08E-13 | 1.70E-12 | 20.05531 |
| BCAS1     | -0.81904 | 6.162268 | -7.6088  | 1.11E-13 | 1.74E-12 | 20.02969 |
| IFT88     | -0.73589 | 7.928524 | -7.59878 | 1.19E-13 | 1.86E-12 | 19.96043 |
| FRY       | -0.55047 | 6.001698 | -7.598   | 1.20E-13 | 1.87E-12 | 19.95508 |
| UBE2E3    | 0.840842 | 9.610461 | 7.589274 | 1.27E-13 | 1.98E-12 | 19.89482 |
| HPN       | -0.59906 | 7.121593 | -7.57322 | 1.43E-13 | 2.21E-12 | 19.78413 |
| MACROD1   | -0.52973 | 6.700135 | -7.57281 | 1.43E-13 | 2.21E-12 | 19.78128 |
| EPS8L1    | -0.53    | 6.978312 | -7.5592  | 1.57E-13 | 2.43E-12 | 19.68766 |
| TFF1      | -1.94347 | 9.039274 | -7.55266 | 1.65E-13 | 2.53E-12 | 19.6427  |
| MLPH      | -1.22001 | 10.35431 | -7.54967 | 1.68E-13 | 2.58E-12 | 19.62209 |
| E2F4      | 0.639695 | 6.845433 | 7.549446 | 1.68E-13 | 2.58E-12 | 19.62059 |
| SPI1      | 0.854911 | 5.280446 | 7.545324 | 1.73E-13 | 2.65E-12 | 19.59227 |
| CERS4     | -0.75291 | 7.017411 | -7.54509 | 1.74E-13 | 2.65E-12 | 19.59066 |
| GRIA2     | -1.22533 | 4.037961 | -7.54175 | 1.78E-13 | 2.71E-12 | 19.56771 |
| MDFIC     | 0.521601 | 7.062985 | 7.53818  | 1.82E-13 | 2.78E-12 | 19.54323 |
| BMPR1B    | -1.3348  | 6.099847 | -7.50967 | 2.22E-13 | 3.38E-12 | 19.34791 |
| KCTD3     | -0.71629 | 8.762185 | -7.50104 | 2.36E-13 | 3.58E-12 | 19.28887 |
| NFIL3     | 0.62066  | 8.050275 | 7.500006 | 2.38E-13 | 3.60E-12 | 19.28182 |
| RAB11FIP3 | -0.50076 | 6.860391 | -7.49858 | 2.40E-13 | 3.63E-12 | 19.27209 |
| GREB1     | -0.75185 | 5.236742 | -7.4984  | 2.41E-13 | 3.63E-12 | 19.27086 |
| DHX38     | 0.598001 | 6.460043 | 7.497302 | 2.42E-13 | 3.64E-12 | 19.26334 |
| PGR       | -1.16113 | 5.63403  | -7.49511 | 2.46E-13 | 3.70E-12 | 19.24837 |
| RNF2      | -0.55734 | 6.337205 | -7.48616 | 2.62E-13 | 3.93E-12 | 19.18725 |
| PPM1H     | -0.5694  | 6.483339 | -7.48366 | 2.67E-13 | 3.99E-12 | 19.17024 |

|          |          |          |          |          |          |          |
|----------|----------|----------|----------|----------|----------|----------|
| GM2A     | 0.58898  | 7.021691 | 7.477354 | 2.78E-13 | 4.16E-12 | 19.12722 |
| IQCA1    | -0.60235 | 4.787903 | -7.47167 | 2.90E-13 | 4.31E-12 | 19.08848 |
| FAM110B  | -0.59513 | 6.360518 | -7.46705 | 2.99E-13 | 4.45E-12 | 19.05704 |
| S100A8   | 1.35971  | 6.753451 | 7.459515 | 3.15E-13 | 4.68E-12 | 19.00574 |
| HLA-DPB1 | 1.015142 | 9.999116 | 7.441449 | 3.57E-13 | 5.28E-12 | 18.88296 |
| SPATA6   | -0.54636 | 5.645951 | -7.4406  | 3.59E-13 | 5.31E-12 | 18.87722 |
| PECAM1   | 0.619978 | 8.388427 | 7.439154 | 3.63E-13 | 5.35E-12 | 18.86738 |
| GAMT     | -0.53425 | 7.080521 | -7.4384  | 3.65E-13 | 5.38E-12 | 18.86225 |
| DHRS9    | 0.539003 | 5.450887 | 7.423989 | 4.03E-13 | 5.91E-12 | 18.76453 |
| TMEM243  | 0.580792 | 8.574119 | 7.407656 | 4.51E-13 | 6.58E-12 | 18.65395 |
| ANXA9    | -0.87029 | 6.439234 | -7.40679 | 4.54E-13 | 6.61E-12 | 18.64811 |
| KCNE4    | -0.95694 | 6.499794 | -7.39791 | 4.82E-13 | 7.02E-12 | 18.5881  |
| CCDC106  | -0.53439 | 5.92239  | -7.38671 | 5.21E-13 | 7.55E-12 | 18.51246 |
| CSAD     | -0.59163 | 6.811607 | -7.38086 | 5.42E-13 | 7.84E-12 | 18.47295 |
| LY86     | 0.769826 | 7.992506 | 7.366052 | 6.00E-13 | 8.65E-12 | 18.3732  |
| CNIH3    | -0.54128 | 5.217838 | -7.35164 | 6.63E-13 | 9.52E-12 | 18.27626 |
| IL20RA   | -0.70044 | 5.522175 | -7.35092 | 6.66E-13 | 9.56E-12 | 18.27142 |
| SYT17    | -0.86755 | 7.331674 | -7.34807 | 6.79E-13 | 9.73E-12 | 18.25225 |
| IFITM1   | 0.557871 | 11.80669 | 7.332262 | 7.57E-13 | 1.08E-11 | 18.14614 |
| NOVA1    | -0.74905 | 4.857875 | -7.32296 | 8.06E-13 | 1.15E-11 | 18.08376 |
| PLAT     | -0.85625 | 8.932192 | -7.31807 | 8.34E-13 | 1.18E-11 | 18.05106 |
| KAT6B    | -0.52104 | 7.704202 | -7.31197 | 8.69E-13 | 1.23E-11 | 18.01019 |
| SPDEF    | -0.57328 | 8.209574 | -7.31165 | 8.71E-13 | 1.23E-11 | 18.00808 |
| GPRC5A   | -0.8213  | 8.067916 | -7.31165 | 8.71E-13 | 1.23E-11 | 18.00808 |
| PLEKHA5  | -0.58821 | 7.027614 | -7.3097  | 8.83E-13 | 1.25E-11 | 17.99504 |
| AP1M2    | -0.60395 | 8.0269   | -7.30176 | 9.32E-13 | 1.31E-11 | 17.94196 |
| GRP      | -0.96189 | 6.910225 | -7.30174 | 9.32E-13 | 1.31E-11 | 17.94178 |
| FOXA1    | -1.24598 | 8.130778 | -7.27582 | 1.11E-12 | 1.56E-11 | 17.76882 |
| BSPRY    | -0.632   | 8.363437 | -7.26979 | 1.16E-12 | 1.63E-11 | 17.72864 |
| CACNA2D2 | -0.64761 | 6.530739 | -7.26912 | 1.16E-12 | 1.63E-11 | 17.7242  |
| ITM2A    | 0.800861 | 8.34982  | 7.261623 | 1.22E-12 | 1.72E-11 | 17.67428 |
| SPATA20  | -0.53343 | 8.427507 | -7.25739 | 1.26E-12 | 1.76E-11 | 17.64613 |
| APBB1IP  | 0.525631 | 5.948655 | 7.249971 | 1.32E-12 | 1.84E-11 | 17.59682 |
| GALR3    | 0.722632 | 5.546484 | 7.24758  | 1.35E-12 | 1.87E-11 | 17.58094 |
| NPY1R    | -1.52066 | 6.910767 | -7.2467  | 1.35E-12 | 1.88E-11 | 17.57506 |
| TRIM9    | -0.56783 | 4.50141  | -7.24034 | 1.41E-12 | 1.96E-11 | 17.53288 |
| CASC1    | -0.69693 | 4.202543 | -7.23739 | 1.44E-12 | 1.99E-11 | 17.51331 |
| INPP4B   | -0.83505 | 6.753673 | -7.23541 | 1.46E-12 | 2.02E-11 | 17.50014 |
| IFIT1    | 0.961487 | 9.099821 | 7.234462 | 1.47E-12 | 2.03E-11 | 17.49387 |
| CD82     | 0.546609 | 7.894499 | 7.229783 | 1.52E-12 | 2.09E-11 | 17.46284 |
| WDR19    | -0.61057 | 6.197034 | -7.2138  | 1.69E-12 | 2.32E-11 | 17.35702 |
| WWP1     | -0.59046 | 9.572824 | -7.20824 | 1.76E-12 | 2.40E-11 | 17.32024 |
| ANKEF1   | -0.60017 | 5.637827 | -7.20786 | 1.76E-12 | 2.41E-11 | 17.31774 |
| KIF3A    | -0.56502 | 7.063907 | -7.20505 | 1.79E-12 | 2.45E-11 | 17.29912 |

|           |          |          |          |          |          |          |
|-----------|----------|----------|----------|----------|----------|----------|
| ADAM15    | 0.768903 | 6.804429 | 7.202366 | 1.83E-12 | 2.49E-11 | 17.28139 |
| F13A1     | 0.800935 | 8.422962 | 7.200749 | 1.85E-12 | 2.51E-11 | 17.27072 |
| ASS1      | 0.80208  | 9.497055 | 7.193568 | 1.94E-12 | 2.62E-11 | 17.22329 |
| DLX2      | -0.56136 | 5.138417 | -7.19252 | 1.95E-12 | 2.64E-11 | 17.21635 |
| AGR2      | -1.59369 | 9.43119  | -7.17762 | 2.16E-12 | 2.91E-11 | 17.11812 |
| TUFT1     | -0.56268 | 8.992239 | -7.17056 | 2.26E-12 | 3.04E-11 | 17.0716  |
| MLLT4-AS1 | -0.58747 | 5.109676 | -7.17049 | 2.26E-12 | 3.04E-11 | 17.07119 |
| NKAIN1    | -0.75415 | 6.095097 | -7.16974 | 2.28E-12 | 3.06E-11 | 17.06623 |
| CYBA      | 0.588176 | 8.529424 | 7.155308 | 2.51E-12 | 3.36E-11 | 16.97131 |
| CXCL12    | 0.681226 | 9.340667 | 7.148605 | 2.62E-12 | 3.50E-11 | 16.92728 |
| CEP290    | -0.89184 | 6.234633 | -7.14645 | 2.66E-12 | 3.55E-11 | 16.91311 |
| C3orf52   | -0.59905 | 6.029602 | -7.14392 | 2.71E-12 | 3.61E-11 | 16.89652 |
| PTGIR     | 0.542417 | 5.720321 | 7.138426 | 2.81E-12 | 3.74E-11 | 16.86048 |
| GPR132    | 0.512038 | 4.213116 | 7.130181 | 2.97E-12 | 3.94E-11 | 16.80644 |
| ALOX5     | 0.543233 | 6.534555 | 7.12586  | 3.05E-12 | 4.05E-11 | 16.77813 |
| CHIC2     | 0.666517 | 8.016657 | 7.109548 | 3.40E-12 | 4.50E-11 | 16.67141 |
| LAT       | 0.549961 | 6.649516 | 7.10847  | 3.43E-12 | 4.53E-11 | 16.66437 |
| CCL22     | 0.553106 | 6.012783 | 7.09834  | 3.67E-12 | 4.84E-11 | 16.5982  |
| XYLT2     | -0.5788  | 5.808582 | -7.08846 | 3.92E-12 | 5.16E-11 | 16.53373 |
| GREB1L    | -0.72931 | 5.755823 | -7.08532 | 4.00E-12 | 5.25E-11 | 16.51328 |
| IL7       | 0.538573 | 4.501838 | 7.08261  | 4.07E-12 | 5.34E-11 | 16.49563 |
| SH3BP1    | 0.583186 | 5.634444 | 7.079308 | 4.16E-12 | 5.44E-11 | 16.47412 |
| ACSL1     | 0.550208 | 8.737784 | 7.057092 | 4.83E-12 | 6.26E-11 | 16.32962 |
| HLA-DQB1  | 0.739889 | 7.130697 | 7.051459 | 5.01E-12 | 6.49E-11 | 16.29304 |
| MEF2C     | 0.52231  | 7.701813 | 7.050211 | 5.05E-12 | 6.54E-11 | 16.28495 |
| IGF1R     | -0.65835 | 7.49375  | -7.04382 | 5.27E-12 | 6.82E-11 | 16.24349 |
| EPB41L5   | -0.50208 | 6.372901 | -7.04045 | 5.39E-12 | 6.96E-11 | 16.22165 |
| PAN2      | -0.61178 | 7.343652 | -7.03121 | 5.73E-12 | 7.39E-11 | 16.16176 |
| SCUBE2    | -1.374   | 8.748075 | -7.02856 | 5.83E-12 | 7.51E-11 | 16.14462 |
| GLS2      | -0.5215  | 4.474307 | -7.02796 | 5.85E-12 | 7.53E-11 | 16.14076 |
| KIF13B    | -0.51765 | 7.819739 | -7.01947 | 6.19E-12 | 7.95E-11 | 16.0858  |
| DNAJC22   | -0.59592 | 5.937933 | -7.01897 | 6.21E-12 | 7.96E-11 | 16.08254 |
| FAM173A   | -0.55532 | 8.126171 | -7.01818 | 6.24E-12 | 8.00E-11 | 16.07748 |
| LILRB3    | 0.555645 | 7.01224  | 6.997918 | 7.13E-12 | 9.08E-11 | 15.94662 |
| KMO       | 0.753889 | 6.429842 | 6.976406 | 8.22E-12 | 1.04E-10 | 15.80806 |
| MEGF9     | -0.52581 | 7.42122  | -6.97573 | 8.25E-12 | 1.04E-10 | 15.80375 |
| CYP1B1    | 0.634497 | 8.108801 | 6.970781 | 8.53E-12 | 1.08E-10 | 15.77189 |
| NME5      | -0.90907 | 6.422475 | -6.96953 | 8.60E-12 | 1.08E-10 | 15.76384 |
| SELP      | 0.53396  | 6.592037 | 6.966224 | 8.79E-12 | 1.11E-10 | 15.7426  |
| PLK1      | 0.876549 | 5.932608 | 6.957546 | 9.30E-12 | 1.17E-10 | 15.68688 |
| ARID3B    | 0.566424 | 5.537937 | 6.947506 | 9.93E-12 | 1.24E-10 | 15.62248 |
| TJP3      | -0.62159 | 7.118142 | -6.92188 | 1.17E-11 | 1.46E-10 | 15.45845 |
| CRLF3     | 0.523249 | 8.684561 | 6.91918  | 1.20E-11 | 1.49E-10 | 15.44122 |
| APOBR     | 0.561812 | 5.246877 | 6.914101 | 1.24E-11 | 1.54E-10 | 15.40879 |

|           |          |          |          |          |          |          |
|-----------|----------|----------|----------|----------|----------|----------|
| SPDYE2    | -0.5565  | 6.844103 | -6.90771 | 1.29E-11 | 1.60E-10 | 15.36801 |
| EEF1A2    | -0.86742 | 7.020195 | -6.90722 | 1.29E-11 | 1.60E-10 | 15.36485 |
| CAP2      | -0.60974 | 8.298148 | -6.90622 | 1.30E-11 | 1.61E-10 | 15.35848 |
| TRPS1     | -0.61966 | 10.42191 | -6.89433 | 1.41E-11 | 1.73E-10 | 15.28275 |
| STIP1     | 0.611943 | 8.029883 | 6.890237 | 1.44E-11 | 1.77E-10 | 15.25667 |
| POU2F3    | -0.60595 | 4.565421 | -6.8886  | 1.46E-11 | 1.79E-10 | 15.24624 |
| SLC5A2    | 0.576544 | 5.237496 | 6.883058 | 1.51E-11 | 1.85E-10 | 15.21099 |
| LGALS9    | 0.590424 | 7.673239 | 6.872926 | 1.61E-11 | 1.97E-10 | 15.1466  |
| PPIF      | 0.568836 | 8.367806 | 6.865028 | 1.70E-11 | 2.07E-10 | 15.09646 |
| HIST2H2BE | -0.69943 | 8.51546  | -6.86397 | 1.71E-11 | 2.08E-10 | 15.08973 |
| CD300C    | 0.546833 | 5.292487 | 6.861116 | 1.74E-11 | 2.11E-10 | 15.07164 |
| GSTP1     | 0.705941 | 9.808945 | 6.856679 | 1.79E-11 | 2.17E-10 | 15.0435  |
| CIRBP     | -0.52268 | 9.502559 | -6.84838 | 1.89E-11 | 2.28E-10 | 14.99095 |
| RAB17     | -0.55204 | 7.052644 | -6.84414 | 1.95E-11 | 2.35E-10 | 14.96408 |
| CD83      | 0.578545 | 8.088324 | 6.841865 | 1.97E-11 | 2.38E-10 | 14.94969 |
| TBX19     | 0.58102  | 5.510966 | 6.832308 | 2.10E-11 | 2.51E-10 | 14.88926 |
| FXYD3     | -0.56402 | 9.85804  | -6.81989 | 2.28E-11 | 2.71E-10 | 14.81081 |
| FAM46C    | 0.628114 | 7.212951 | 6.804188 | 2.52E-11 | 2.99E-10 | 14.71186 |
| CDC45     | 0.690169 | 5.565476 | 6.801877 | 2.56E-11 | 3.03E-10 | 14.6973  |
| SORD      | -0.57078 | 8.032957 | -6.79172 | 2.73E-11 | 3.22E-10 | 14.63341 |
| PLBD1     | 0.573369 | 8.917634 | 6.789018 | 2.78E-11 | 3.27E-10 | 14.61641 |
| HES1      | -0.52826 | 7.511615 | -6.78482 | 2.85E-11 | 3.36E-10 | 14.59005 |
| SELE      | 0.665041 | 5.406289 | 6.776933 | 3.00E-11 | 3.53E-10 | 14.54051 |
| LZTFL1    | -0.58208 | 6.562465 | -6.77657 | 3.01E-11 | 3.53E-10 | 14.53821 |
| FMO3      | 0.65951  | 4.939158 | 6.771168 | 3.11E-11 | 3.65E-10 | 14.50434 |
| CBR1      | 0.594137 | 7.343301 | 6.765351 | 3.23E-11 | 3.78E-10 | 14.46787 |
| MZT2B     | -0.70182 | 8.290073 | -6.76253 | 3.29E-11 | 3.84E-10 | 14.45018 |
| MMP12     | 1.279636 | 6.152958 | 6.748916 | 3.59E-11 | 4.17E-10 | 14.36499 |
| KEL       | 0.528149 | 4.830056 | 6.73623  | 3.89E-11 | 4.50E-10 | 14.28571 |
| ASCL1     | -0.51921 | 4.331878 | -6.73153 | 4.01E-11 | 4.63E-10 | 14.25635 |
| PBX1      | -0.51425 | 9.823045 | -6.72949 | 4.06E-11 | 4.69E-10 | 14.24366 |
| LDHB      | 0.689837 | 11.36167 | 6.726455 | 4.14E-11 | 4.77E-10 | 14.22472 |
| HOOK1     | -0.68587 | 7.082697 | -6.72256 | 4.25E-11 | 4.88E-10 | 14.20042 |
| CFI       | 0.563919 | 6.697277 | 6.720345 | 4.31E-11 | 4.93E-10 | 14.18664 |
| MAGI1     | -0.54118 | 5.997584 | -6.71374 | 4.49E-11 | 5.14E-10 | 14.14551 |
| CAV3      | 0.609834 | 5.191344 | 6.712738 | 4.52E-11 | 5.17E-10 | 14.13925 |
| C1QTNF3   | -0.60144 | 6.684159 | -6.68866 | 5.27E-11 | 5.96E-10 | 13.9896  |
| YTHDC2    | -0.50279 | 6.708732 | -6.67301 | 5.82E-11 | 6.54E-10 | 13.89259 |
| SLC16A6   | -0.75624 | 7.210531 | -6.66802 | 6.01E-11 | 6.73E-10 | 13.86166 |
| OAS3      | 0.664029 | 7.388687 | 6.660106 | 6.31E-11 | 7.07E-10 | 13.81272 |
| GDF15     | -0.5165  | 5.132903 | -6.65502 | 6.52E-11 | 7.28E-10 | 13.7813  |
| ZNF552    | -0.53066 | 6.813269 | -6.65342 | 6.59E-11 | 7.35E-10 | 13.77137 |
| COASY     | -0.51116 | 8.618348 | -6.64852 | 6.79E-11 | 7.56E-10 | 13.74116 |
| ARL2BP    | 0.512084 | 8.41265  | 6.638939 | 7.22E-11 | 8.00E-10 | 13.68202 |

|            |          |          |          |          |          |          |
|------------|----------|----------|----------|----------|----------|----------|
| SELENBP1   | -0.59391 | 9.171905 | -6.63609 | 7.35E-11 | 8.14E-10 | 13.66446 |
| OLFML1     | 0.635449 | 6.930069 | 6.634928 | 7.40E-11 | 8.19E-10 | 13.65729 |
| GPX3       | 0.645244 | 8.707543 | 6.626298 | 7.82E-11 | 8.61E-10 | 13.60413 |
| PP14571    | -0.83272 | 5.27656  | -6.62607 | 7.83E-11 | 8.62E-10 | 13.60273 |
| FBLN5      | 0.664756 | 8.115462 | 6.625817 | 7.84E-11 | 8.62E-10 | 13.60117 |
| GVINP1     | 0.551903 | 5.291874 | 6.610087 | 8.65E-11 | 9.48E-10 | 13.50444 |
| TMEM106C   | -0.52447 | 8.566508 | -6.58072 | 1.04E-10 | 1.13E-09 | 13.3244  |
| TMA16      | -0.58965 | 6.191781 | -6.57146 | 1.10E-10 | 1.19E-09 | 13.26773 |
| PLA2G2A    | 0.787512 | 7.056723 | 6.564454 | 1.15E-10 | 1.24E-09 | 13.22494 |
| CSGALNACT1 | 0.569518 | 7.483483 | 6.560388 | 1.18E-10 | 1.27E-09 | 13.20012 |
| CD53       | 0.892595 | 8.012975 | 6.559807 | 1.19E-10 | 1.28E-09 | 13.19657 |
| GCH1       | 0.725999 | 8.324871 | 6.544006 | 1.31E-10 | 1.40E-09 | 13.10024 |
| FABP5      | 0.778141 | 9.381477 | 6.539633 | 1.35E-10 | 1.44E-09 | 13.07361 |
| ANKS1B     | -0.58942 | 4.344597 | -6.53311 | 1.40E-10 | 1.50E-09 | 13.03395 |
| DPEP1      | 0.543549 | 5.338106 | 6.526628 | 1.46E-10 | 1.55E-09 | 12.99452 |
| BBS4       | -0.58637 | 7.390756 | -6.52439 | 1.48E-10 | 1.57E-09 | 12.98095 |
| SYT2       | 0.554163 | 4.921316 | 6.516488 | 1.55E-10 | 1.65E-09 | 12.93295 |
| ZNF562     | -0.53435 | 6.895565 | -6.4935  | 1.79E-10 | 1.89E-09 | 12.79368 |
| SCNN1A     | -0.50949 | 6.901653 | -6.48839 | 1.85E-10 | 1.94E-09 | 12.76274 |
| NROB2      | 0.523833 | 4.842912 | 6.472818 | 2.04E-10 | 2.13E-09 | 12.66872 |
| KIAA1324   | -0.8929  | 8.573663 | -6.47068 | 2.06E-10 | 2.16E-09 | 12.65584 |
| BEX1       | -1.16623 | 6.070419 | -6.46974 | 2.08E-10 | 2.17E-09 | 12.65018 |
| BCAS4      | -0.50714 | 6.460557 | -6.46362 | 2.15E-10 | 2.25E-09 | 12.61328 |
| MYRIP      | -0.54582 | 4.687121 | -6.44672 | 2.39E-10 | 2.49E-09 | 12.51156 |
| TGFBR2     | 0.606711 | 7.677086 | 6.436791 | 2.54E-10 | 2.63E-09 | 12.4519  |
| AHSA2      | -0.54833 | 7.09055  | -6.43268 | 2.61E-10 | 2.69E-09 | 12.42723 |
| ATRN1      | -0.50144 | 4.207426 | -6.43049 | 2.64E-10 | 2.72E-09 | 12.41409 |
| UGDH       | -0.58975 | 9.83304  | -6.42724 | 2.70E-10 | 2.77E-09 | 12.39458 |
| ALDH8A1    | -0.67935 | 4.638781 | -6.40625 | 3.07E-10 | 3.13E-09 | 12.26892 |
| MPPED2     | -0.62951 | 5.055446 | -6.40034 | 3.18E-10 | 3.24E-09 | 12.23358 |
| HSPA2      | -0.73007 | 8.256636 | -6.39147 | 3.36E-10 | 3.40E-09 | 12.18061 |
| PDE1B      | 0.541325 | 4.809859 | 6.372045 | 3.78E-10 | 3.81E-09 | 12.06487 |
| CENPA      | 0.511403 | 6.426169 | 6.369578 | 3.84E-10 | 3.87E-09 | 12.05019 |
| LIPG       | 0.568218 | 4.856156 | 6.367765 | 3.88E-10 | 3.91E-09 | 12.03941 |
| HOXC8      | -0.61258 | 5.750634 | -6.36574 | 3.93E-10 | 3.95E-09 | 12.02738 |
| SPINK2     | 0.540913 | 4.353528 | 6.364809 | 3.95E-10 | 3.97E-09 | 12.02183 |
| IMPDH2     | -0.52415 | 10.98472 | -6.36235 | 4.01E-10 | 4.03E-09 | 12.00719 |
| KIAA1614   | 0.535869 | 4.800731 | 6.340539 | 4.58E-10 | 4.57E-09 | 11.87777 |
| RRAGD      | 0.521151 | 7.36211  | 6.336866 | 4.68E-10 | 4.66E-09 | 11.85601 |
| CTSK       | 0.629721 | 11.00417 | 6.334635 | 4.75E-10 | 4.72E-09 | 11.8428  |
| SALL2      | -0.5601  | 7.341555 | -6.32458 | 5.04E-10 | 4.99E-09 | 11.78328 |
| PDCD1      | 0.506083 | 5.660213 | 6.319492 | 5.20E-10 | 5.14E-09 | 11.75324 |
| TDO2       | 0.697495 | 5.328405 | 6.314625 | 5.36E-10 | 5.29E-09 | 11.72448 |
| STX11      | 0.679097 | 4.565412 | 6.30933  | 5.53E-10 | 5.45E-09 | 11.69323 |

|           |          |          |          |          |          |          |
|-----------|----------|----------|----------|----------|----------|----------|
| FLRT3     | -0.82571 | 6.147809 | -6.30424 | 5.70E-10 | 5.61E-09 | 11.6632  |
| AFF3      | -0.81551 | 4.933381 | -6.30232 | 5.77E-10 | 5.67E-09 | 11.65191 |
| CLIC4     | 0.549995 | 8.607894 | 6.27828  | 6.67E-10 | 6.52E-09 | 11.51042 |
| SEC14L2   | -0.60058 | 6.08801  | -6.26498 | 7.23E-10 | 7.04E-09 | 11.43237 |
| TSPAN7    | 0.663283 | 6.552023 | 6.264571 | 7.25E-10 | 7.05E-09 | 11.42996 |
| PPP1R3C   | -0.83182 | 6.81865  | -6.25004 | 7.91E-10 | 7.62E-09 | 11.34485 |
| EML4      | 0.517394 | 7.043505 | 6.25004  | 7.91E-10 | 7.62E-09 | 11.34484 |
| CTNND2    | -0.54394 | 5.007385 | -6.24242 | 8.28E-10 | 7.94E-09 | 11.30027 |
| SERPINA5  | -0.91347 | 6.76251  | -6.23869 | 8.46E-10 | 8.11E-09 | 11.27845 |
| TPBG      | -0.65965 | 9.25765  | -6.23837 | 8.48E-10 | 8.12E-09 | 11.27663 |
| PLK2      | -0.70483 | 9.1861   | -6.22374 | 9.26E-10 | 8.83E-09 | 11.19121 |
| CHODL     | 0.652343 | 4.735356 | 6.215216 | 9.74E-10 | 9.27E-09 | 11.14155 |
| LPXN      | 0.506706 | 7.663138 | 6.214376 | 9.79E-10 | 9.31E-09 | 11.13666 |
| GSTM3     | -0.90545 | 8.933573 | -6.20494 | 1.04E-09 | 9.81E-09 | 11.08177 |
| PTPRT     | -0.78022 | 5.920532 | -6.19613 | 1.09E-09 | 1.03E-08 | 11.03057 |
| SLC27A2   | -0.77242 | 5.960176 | -6.19597 | 1.09E-09 | 1.03E-08 | 11.02961 |
| ITGAX     | 0.522861 | 5.657167 | 6.19432  | 1.10E-09 | 1.04E-08 | 11.02005 |
| LINC00472 | -0.73509 | 5.285789 | -6.19394 | 1.11E-09 | 1.04E-08 | 11.01784 |
| ARHGEF26  | -0.55327 | 5.512523 | -6.19051 | 1.13E-09 | 1.06E-08 | 10.9979  |
| NCAPH     | 0.658168 | 5.617909 | 6.18997  | 1.13E-09 | 1.06E-08 | 10.9948  |
| MMP7      | 0.948441 | 8.487309 | 6.170769 | 1.27E-09 | 1.18E-08 | 10.88353 |
| RALGPS2   | -0.56138 | 6.374713 | -6.16881 | 1.28E-09 | 1.19E-08 | 10.87221 |
| SLC2A6    | 0.552817 | 5.911493 | 6.167852 | 1.29E-09 | 1.20E-08 | 10.86666 |
| CFH       | 0.620671 | 7.883996 | 6.164555 | 1.32E-09 | 1.22E-08 | 10.84759 |
| SLC6A7    | 0.542754 | 4.508266 | 6.16415  | 1.32E-09 | 1.22E-08 | 10.84525 |
| CYP2B7P   | -1.02403 | 6.339642 | -6.15857 | 1.36E-09 | 1.26E-08 | 10.81299 |
| ACADSB    | -0.79381 | 6.954945 | -6.1549  | 1.39E-09 | 1.28E-08 | 10.79182 |
| YTHDC1    | -0.50609 | 7.047745 | -6.14479 | 1.48E-09 | 1.36E-08 | 10.73348 |
| TOX3      | -0.88426 | 7.302694 | -6.14107 | 1.51E-09 | 1.38E-08 | 10.71202 |
| AMPD1     | 0.519317 | 4.927151 | 6.133333 | 1.58E-09 | 1.44E-08 | 10.66748 |
| ADD3      | 0.536657 | 9.719276 | 6.130814 | 1.61E-09 | 1.46E-08 | 10.65299 |
| SLC22A5   | -0.51214 | 6.640063 | -6.12844 | 1.63E-09 | 1.48E-08 | 10.63931 |
| CITED1    | -0.66507 | 5.665165 | -6.11633 | 1.75E-09 | 1.59E-08 | 10.56972 |
| GRAMD1C   | -0.65965 | 6.271798 | -6.11016 | 1.82E-09 | 1.64E-08 | 10.53434 |
| PIK3CG    | 0.607772 | 5.134923 | 6.083066 | 2.13E-09 | 1.91E-08 | 10.37919 |
| ENPP1     | -0.68764 | 6.489794 | -6.07841 | 2.19E-09 | 1.95E-08 | 10.35257 |
| PDZK1     | -1.1174  | 5.535991 | -6.07711 | 2.21E-09 | 1.97E-08 | 10.34516 |
| REEP1     | -0.71701 | 7.090087 | -6.07293 | 2.26E-09 | 2.01E-08 | 10.32132 |
| AR        | -0.78189 | 8.029001 | -6.06458 | 2.37E-09 | 2.11E-08 | 10.27367 |
| HIST1H3E  | -0.52549 | 5.469911 | -6.05454 | 2.52E-09 | 2.22E-08 | 10.21653 |
| PRKAA2    | -0.54445 | 5.447837 | -6.05432 | 2.52E-09 | 2.22E-08 | 10.21528 |
| FLT3LG    | 0.61934  | 5.293559 | 6.04302  | 2.69E-09 | 2.36E-08 | 10.15102 |
| NMI       | 0.656233 | 9.173052 | 6.013734 | 3.19E-09 | 2.79E-08 | 9.984989 |
| LRP8      | 0.520623 | 6.386336 | 6.010315 | 3.26E-09 | 2.84E-08 | 9.965653 |

|          |          |          |          |          |          |          |
|----------|----------|----------|----------|----------|----------|----------|
| ERI2     | -0.6805  | 6.277366 | -6.00548 | 3.35E-09 | 2.92E-08 | 9.938317 |
| FAM189A2 | -0.54801 | 6.826926 | -5.99845 | 3.49E-09 | 3.04E-08 | 9.898629 |
| PRLR     | -0.59736 | 6.583531 | -5.9904  | 3.66E-09 | 3.17E-08 | 9.853225 |
| TEX14    | -0.57173 | 4.170827 | -5.98938 | 3.68E-09 | 3.19E-08 | 9.847475 |
| ADORA2B  | 0.626852 | 5.616594 | 5.968153 | 4.16E-09 | 3.58E-08 | 9.728006 |
| CPB1     | -1.51247 | 6.71993  | -5.95619 | 4.46E-09 | 3.82E-08 | 9.660854 |
| AREG     | -0.7968  | 5.39176  | -5.94799 | 4.67E-09 | 4.00E-08 | 9.614872 |
| RET      | -0.53174 | 6.173307 | -5.94678 | 4.70E-09 | 4.02E-08 | 9.608104 |
| NR4A2    | -0.67571 | 7.311767 | -5.94285 | 4.81E-09 | 4.11E-08 | 9.586101 |
| TSPAN1   | -0.84592 | 7.536096 | -5.93637 | 4.99E-09 | 4.26E-08 | 9.549822 |
| PRSS8    | -0.52159 | 8.82921  | -5.9267  | 5.28E-09 | 4.48E-08 | 9.495783 |
| DECR2    | -0.50662 | 8.340086 | -5.9258  | 5.31E-09 | 4.50E-08 | 9.490787 |
| CD74     | 1.098383 | 9.986057 | 5.919593 | 5.50E-09 | 4.66E-08 | 9.456135 |
| AZGP1    | -0.9609  | 11.16275 | -5.91762 | 5.56E-09 | 4.70E-08 | 9.445125 |
| CYBB     | 0.701865 | 6.271097 | 5.91287  | 5.72E-09 | 4.82E-08 | 9.418651 |
| GLCE     | -0.53394 | 7.067168 | -5.91264 | 5.72E-09 | 4.82E-08 | 9.417362 |
| MTCL1    | -0.5329  | 7.039337 | -5.90139 | 6.10E-09 | 5.12E-08 | 9.354739 |
| C2       | 0.539218 | 6.330116 | 5.894386 | 6.35E-09 | 5.31E-08 | 9.315785 |
| VAV3     | -0.61921 | 8.354401 | -5.89127 | 6.47E-09 | 5.39E-08 | 9.298481 |
| SYBU     | -0.70955 | 7.525791 | -5.88704 | 6.63E-09 | 5.52E-08 | 9.274987 |
| TSPAN13  | -0.62675 | 11.87235 | -5.8836  | 6.76E-09 | 5.62E-08 | 9.255873 |
| STK32B   | -0.65805 | 5.853765 | -5.8771  | 7.01E-09 | 5.81E-08 | 9.219867 |
| TMC5     | -0.9592  | 6.862738 | -5.86863 | 7.36E-09 | 6.08E-08 | 9.172923 |
| SMA4     | -0.67277 | 7.803931 | -5.8521  | 8.08E-09 | 6.64E-08 | 9.081557 |
| AGTR1    | -0.8258  | 6.358693 | -5.84531 | 8.40E-09 | 6.87E-08 | 9.044048 |
| SLC34A2  | 0.75058  | 5.87127  | 5.843922 | 8.47E-09 | 6.92E-08 | 9.036401 |
| LRRC17   | -0.73382 | 6.493014 | -5.8436  | 8.48E-09 | 6.93E-08 | 9.03462  |
| SYT1     | -0.77859 | 5.284675 | -5.84042 | 8.64E-09 | 7.05E-08 | 9.017086 |
| MATN3    | -0.80654 | 5.307735 | -5.83684 | 8.82E-09 | 7.18E-08 | 8.997366 |
| CELSR1   | -0.5319  | 5.669987 | -5.81991 | 9.70E-09 | 7.86E-08 | 8.904229 |
| GRIK3    | -0.55011 | 4.174688 | -5.81362 | 1.01E-08 | 8.13E-08 | 8.869674 |
| PADI3    | 0.515137 | 4.39797  | 5.79918  | 1.09E-08 | 8.76E-08 | 8.790489 |
| STK17B   | 0.630988 | 6.426709 | 5.795048 | 1.12E-08 | 8.96E-08 | 8.767863 |
| MED13L   | -0.54563 | 8.197842 | -5.79492 | 1.12E-08 | 8.96E-08 | 8.767174 |
| PROM1    | 1.130079 | 8.42349  | 5.793723 | 1.12E-08 | 9.00E-08 | 8.760608 |
| C5orf42  | -0.56347 | 4.712352 | -5.79359 | 1.13E-08 | 9.00E-08 | 8.759906 |
| E2F5     | 0.533995 | 6.872447 | 5.792802 | 1.13E-08 | 9.03E-08 | 8.755569 |
| CLEC2B   | 0.713097 | 7.969741 | 5.788911 | 1.16E-08 | 9.21E-08 | 8.73428  |
| SERPINA3 | -0.91528 | 11.24023 | -5.775   | 1.25E-08 | 9.89E-08 | 8.65826  |
| RHCG     | 0.547666 | 4.350289 | 5.774203 | 1.26E-08 | 9.92E-08 | 8.653936 |
| ANP32E   | 0.652924 | 8.16277  | 5.770492 | 1.28E-08 | 1.01E-07 | 8.633697 |
| ANKRD36B | -0.74837 | 8.759789 | -5.76923 | 1.29E-08 | 1.02E-07 | 8.626797 |
| HLA-DQA1 | 1.449384 | 7.84189  | 5.769047 | 1.29E-08 | 1.02E-07 | 8.625816 |
| DSPP     | -0.57715 | 4.882938 | -5.75359 | 1.41E-08 | 1.10E-07 | 8.541651 |

|           |          |          |          |          |          |          |
|-----------|----------|----------|----------|----------|----------|----------|
| TREM2     | 0.582512 | 7.262986 | 5.750519 | 1.43E-08 | 1.12E-07 | 8.524947 |
| ARHGDI3   | 0.562637 | 9.9135   | 5.749184 | 1.44E-08 | 1.13E-07 | 8.517689 |
| RAPGEF4   | -0.61605 | 5.421129 | -5.74399 | 1.49E-08 | 1.16E-07 | 8.489474 |
| FAM171A1  | 0.535379 | 7.975861 | 5.740207 | 1.52E-08 | 1.18E-07 | 8.46893  |
| IFIT2     | 0.578254 | 7.452968 | 5.740167 | 1.52E-08 | 1.18E-07 | 8.468713 |
| EPN3      | -0.53371 | 6.95686  | -5.73352 | 1.58E-08 | 1.23E-07 | 8.432633 |
| CROT      | -0.63718 | 6.919093 | -5.72588 | 1.65E-08 | 1.28E-07 | 8.391247 |
| CD80      | 0.523724 | 5.005119 | 5.717127 | 1.73E-08 | 1.34E-07 | 8.34388  |
| TMEM212   | -0.56921 | 5.190617 | -5.71332 | 1.76E-08 | 1.36E-07 | 8.323308 |
| LBR       | 0.560815 | 9.120327 | 5.711946 | 1.78E-08 | 1.37E-07 | 8.315869 |
| CERS6     | -0.51187 | 8.809715 | -5.70677 | 1.83E-08 | 1.41E-07 | 8.287926 |
| CDC42EP1  | 0.591446 | 6.543693 | 5.693319 | 1.97E-08 | 1.51E-07 | 8.215359 |
| PER3      | -0.54095 | 5.98869  | -5.68494 | 2.07E-08 | 1.58E-07 | 8.170249 |
| EVL       | -0.55765 | 9.291981 | -5.67519 | 2.18E-08 | 1.65E-07 | 8.117843 |
| SNX10     | 0.580362 | 8.173105 | 5.667954 | 2.27E-08 | 1.72E-07 | 8.078962 |
| EFHD1     | -0.54975 | 10.86273 | -5.65801 | 2.40E-08 | 1.81E-07 | 8.025643 |
| RNF103    | -0.51586 | 8.186911 | -5.64096 | 2.63E-08 | 1.98E-07 | 7.934402 |
| KCNN4     | 0.554755 | 6.889098 | 5.637908 | 2.68E-08 | 2.01E-07 | 7.918103 |
| MYOD1     | 0.502705 | 4.669786 | 5.632061 | 2.77E-08 | 2.06E-07 | 7.886885 |
| SLC1A3    | 0.523062 | 6.432123 | 5.596176 | 3.37E-08 | 2.48E-07 | 7.695947 |
| IL33      | 0.730383 | 5.675567 | 5.573125 | 3.82E-08 | 2.79E-07 | 7.573874 |
| FCGR2A    | 0.542471 | 6.597296 | 5.571543 | 3.85E-08 | 2.81E-07 | 7.565511 |
| TGM2      | 0.612433 | 6.137263 | 5.549397 | 4.35E-08 | 3.15E-07 | 7.448686 |
| ACKR1     | 0.737791 | 7.126615 | 5.547038 | 4.40E-08 | 3.19E-07 | 7.43627  |
| SH3BP4    | -0.62062 | 8.331376 | -5.54353 | 4.49E-08 | 3.24E-07 | 7.417833 |
| SLPI      | 0.845645 | 8.802569 | 5.536277 | 4.67E-08 | 3.36E-07 | 7.379675 |
| DPY19L2P2 | -0.50987 | 4.311874 | -5.53067 | 4.81E-08 | 3.46E-07 | 7.350214 |
| DHRS2     | -1.02544 | 6.239486 | -5.51626 | 5.20E-08 | 3.72E-07 | 7.274657 |
| C1orf21   | -0.57151 | 6.588472 | -5.50902 | 5.41E-08 | 3.85E-07 | 7.236761 |
| CDCA8     | 0.586513 | 6.665567 | 5.492077 | 5.93E-08 | 4.20E-07 | 7.148261 |
| HOXC6     | -0.70262 | 9.305785 | -5.47751 | 6.41E-08 | 4.50E-07 | 7.072357 |
| MST1      | -0.50071 | 6.566642 | -5.47628 | 6.45E-08 | 4.53E-07 | 7.065982 |
| SYT13     | -0.54822 | 5.668631 | -5.46904 | 6.71E-08 | 4.70E-07 | 7.028324 |
| EP300     | -0.52155 | 7.814556 | -5.46599 | 6.82E-08 | 4.76E-07 | 7.012471 |
| SLC12A5   | -0.508   | 4.162669 | -5.44991 | 7.43E-08 | 5.18E-07 | 6.929071 |
| SLC6A4    | -0.68428 | 4.894918 | -5.43996 | 7.84E-08 | 5.45E-07 | 6.877553 |
| PRR15L    | -0.55811 | 7.991785 | -5.40101 | 9.65E-08 | 6.57E-07 | 6.676738 |
| HBB       | 0.798604 | 8.256196 | 5.400316 | 9.68E-08 | 6.59E-07 | 6.673178 |
| LXN       | 0.626337 | 8.516794 | 5.39177  | 1.01E-07 | 6.87E-07 | 6.6293   |
| GPR1      | -0.50349 | 5.221055 | -5.36345 | 1.18E-07 | 7.87E-07 | 6.484335 |
| PRAME     | 0.793437 | 5.759882 | 5.358246 | 1.21E-07 | 8.06E-07 | 6.457789 |
| NBEA      | -0.52359 | 6.690772 | -5.34642 | 1.29E-07 | 8.54E-07 | 6.397536 |
| NRIP3     | -0.67215 | 6.984059 | -5.33209 | 1.39E-07 | 9.17E-07 | 6.324638 |
| PARD6B    | -0.66639 | 5.339925 | -5.2664  | 1.96E-07 | 1.26E-06 | 5.992857 |

|          |          |          |          |          |          |          |
|----------|----------|----------|----------|----------|----------|----------|
| ATP1B1   | -0.6068  | 11.22322 | -5.25767 | 2.05E-07 | 1.32E-06 | 5.94905  |
| CCL7     | 0.553151 | 4.549381 | 5.253394 | 2.09E-07 | 1.34E-06 | 5.927624 |
| FKBP5    | 0.70806  | 7.13466  | 5.239796 | 2.25E-07 | 1.43E-06 | 5.859562 |
| PLA2G4A  | 0.566737 | 5.852598 | 5.226013 | 2.41E-07 | 1.52E-06 | 5.790743 |
| GALNT14  | 0.552207 | 5.886418 | 5.211735 | 2.60E-07 | 1.63E-06 | 5.719626 |
| IL12RB2  | 0.524883 | 4.597323 | 5.178471 | 3.08E-07 | 1.90E-06 | 5.554627 |
| ZNF611   | -0.60521 | 7.20135  | -5.16032 | 3.38E-07 | 2.07E-06 | 5.465005 |
| ACTL8    | 0.537514 | 5.351793 | 5.160266 | 3.38E-07 | 2.07E-06 | 5.464735 |
| PLEKHA6  | -0.52708 | 6.412325 | -5.14071 | 3.74E-07 | 2.27E-06 | 5.368478 |
| TMEM176B | 0.564746 | 7.889482 | 5.128726 | 3.97E-07 | 2.40E-06 | 5.309675 |
| DPT      | 0.522275 | 7.815564 | 5.1175   | 4.20E-07 | 2.53E-06 | 5.254695 |
| CRIP1    | -0.76563 | 10.28649 | -5.11658 | 4.22E-07 | 2.54E-06 | 5.250208 |
| UCHL1    | 0.552478 | 6.200967 | 5.099904 | 4.60E-07 | 2.75E-06 | 5.168741 |
| GALNT6   | -0.67252 | 9.163863 | -5.09721 | 4.66E-07 | 2.78E-06 | 5.155603 |
| LAPTM4B  | 0.53902  | 10.10842 | 5.094403 | 4.73E-07 | 2.81E-06 | 5.141924 |
| NBR2     | -0.50812 | 6.082854 | -5.08514 | 4.95E-07 | 2.94E-06 | 5.096833 |
| CLEC7A   | 0.591104 | 6.025197 | 5.083618 | 4.99E-07 | 2.96E-06 | 5.089426 |
| ARNT2    | -0.55052 | 7.036176 | -5.07676 | 5.17E-07 | 3.05E-06 | 5.056105 |
| MKL2     | -0.81498 | 7.302046 | -5.07314 | 5.26E-07 | 3.10E-06 | 5.038504 |
| ERAP2    | 0.537316 | 6.030608 | 5.062172 | 5.56E-07 | 3.26E-06 | 4.985337 |
| PGBD5    | 0.603433 | 5.424218 | 5.05498  | 5.76E-07 | 3.38E-06 | 4.950524 |
| ALCAM    | -0.53763 | 9.102062 | -5.04266 | 6.13E-07 | 3.57E-06 | 4.890979 |
| ADIRF    | -0.6976  | 9.354447 | -5.01926 | 6.89E-07 | 3.97E-06 | 4.778255 |
| MCCC2    | -0.51408 | 7.534161 | -5.014   | 7.08E-07 | 4.07E-06 | 4.753011 |
| OXTR     | -0.55211 | 6.556961 | -4.96512 | 9.02E-07 | 5.11E-06 | 4.51932  |
| MUC1     | -0.65593 | 9.323031 | -4.95187 | 9.63E-07 | 5.43E-06 | 4.456347 |
| QPCT     | 0.618503 | 6.970843 | 4.937855 | 1.03E-06 | 5.75E-06 | 4.389914 |
| TCEAL1   | -0.51057 | 8.342897 | -4.9135  | 1.16E-06 | 6.40E-06 | 4.274863 |
| GALNT7   | -0.5465  | 9.38539  | -4.8771  | 1.39E-06 | 7.52E-06 | 4.103895 |
| CLGN     | -0.86735 | 6.151551 | -4.8279  | 1.76E-06 | 9.32E-06 | 3.874641 |
| LAMA3    | -0.58501 | 5.62173  | -4.82412 | 1.80E-06 | 9.47E-06 | 3.85711  |
| SLC2A10  | -0.50698 | 9.421205 | -4.81727 | 1.86E-06 | 9.73E-06 | 3.825366 |
| ATP6V0C  | 0.533686 | 9.903233 | 4.794575 | 2.07E-06 | 1.07E-05 | 3.720575 |
| ST6GAL1  | 0.513518 | 6.265182 | 4.788202 | 2.13E-06 | 1.10E-05 | 3.691225 |
| FXD1     | 0.527019 | 5.975948 | 4.786423 | 2.15E-06 | 1.11E-05 | 3.683039 |
| LBP      | 0.67264  | 5.247215 | 4.765163 | 2.38E-06 | 1.22E-05 | 3.585429 |
| PIP      | -1.1624  | 10.10035 | -4.75243 | 2.53E-06 | 1.29E-05 | 3.527152 |
| HMGCS2   | -0.74843 | 5.573948 | -4.74739 | 2.59E-06 | 1.31E-05 | 3.504118 |
| PVALB    | -0.77583 | 4.928333 | -4.74644 | 2.61E-06 | 1.32E-05 | 3.499795 |
| PI3      | 0.578996 | 4.868344 | 4.733262 | 2.77E-06 | 1.40E-05 | 3.439711 |
| NDP      | -0.66319 | 5.389872 | -4.71041 | 3.09E-06 | 1.53E-05 | 3.335886 |
| SLC2A3   | 0.556952 | 7.144457 | 4.705475 | 3.16E-06 | 1.56E-05 | 3.313531 |
| STEAP1   | 0.509494 | 7.874875 | 4.681692 | 3.54E-06 | 1.73E-05 | 3.206077 |
| SLC44A4  | -0.71867 | 6.733189 | -4.6666  | 3.80E-06 | 1.85E-05 | 3.138169 |

|          |          |          |          |          |          |          |
|----------|----------|----------|----------|----------|----------|----------|
| DKK1     | 0.789601 | 5.845321 | 4.643057 | 4.24E-06 | 2.05E-05 | 3.032592 |
| NAT1     | -1.04664 | 9.3357   | -4.63665 | 4.37E-06 | 2.11E-05 | 3.003954 |
| HSPB8    | -0.50284 | 6.950239 | -4.60914 | 4.97E-06 | 2.37E-05 | 2.881412 |
| ACYP1    | -0.50428 | 7.432462 | -4.59982 | 5.19E-06 | 2.46E-05 | 2.840026 |
| NF1      | -0.50326 | 4.16304  | -4.58523 | 5.55E-06 | 2.61E-05 | 2.775431 |
| PDK1     | 0.502309 | 6.084478 | 4.582947 | 5.61E-06 | 2.64E-05 | 2.765343 |
| SLC7A2   | -0.60769 | 5.397817 | -4.57124 | 5.92E-06 | 2.77E-05 | 2.713675 |
| ACOX2    | -0.59319 | 7.252951 | -4.56448 | 6.11E-06 | 2.85E-05 | 2.683904 |
| KLK6     | 0.663135 | 5.778328 | 4.557147 | 6.31E-06 | 2.94E-05 | 2.651628 |
| MORF4L2  | -0.65603 | 9.987908 | -4.52743 | 7.24E-06 | 3.33E-05 | 2.521393 |
| DEPTOR   | -0.52265 | 7.373494 | -4.52188 | 7.42E-06 | 3.40E-05 | 2.497175 |
| HTR2B    | 0.530154 | 5.656085 | 4.510844 | 7.80E-06 | 3.55E-05 | 2.449047 |
| MMP10    | -0.5565  | 5.108256 | -4.498   | 8.27E-06 | 3.75E-05 | 2.393197 |
| GREM1    | 0.512664 | 7.927461 | 4.49059  | 8.56E-06 | 3.86E-05 | 2.361041 |
| MFAP4    | 0.723406 | 6.856066 | 4.478662 | 9.03E-06 | 4.06E-05 | 2.309382 |
| NABP1    | 0.61067  | 6.056002 | 4.469948 | 9.40E-06 | 4.21E-05 | 2.271724 |
| ANKRD36  | -0.72029 | 6.425487 | -4.4693  | 9.42E-06 | 4.22E-05 | 2.268919 |
| C1orf106 | 0.551366 | 7.356544 | 4.44861  | 1.03E-05 | 4.60E-05 | 2.179807 |
| PTHLH    | -0.55719 | 5.204841 | -4.44641 | 1.04E-05 | 4.64E-05 | 2.170358 |
| HSD17B2  | 0.636494 | 4.840338 | 4.434195 | 1.10E-05 | 4.89E-05 | 2.117939 |
| CAMLG    | -0.50052 | 9.862967 | -4.4223  | 1.16E-05 | 5.13E-05 | 2.06705  |
| KCNK15   | -0.50993 | 4.908147 | -4.35679 | 1.56E-05 | 6.70E-05 | 1.788949 |
| WISP2    | 0.564829 | 7.135452 | 4.35653  | 1.56E-05 | 6.70E-05 | 1.787859 |
| HSD17B4  | -0.50927 | 8.053039 | -4.3351  | 1.72E-05 | 7.29E-05 | 1.697756 |
| CYP4B1   | -0.65763 | 6.275682 | -4.33484 | 1.72E-05 | 7.30E-05 | 1.69664  |
| MMP3     | 0.669492 | 7.771158 | 4.330918 | 1.75E-05 | 7.42E-05 | 1.680206 |
| UGT2B4   | -0.55538 | 2.869604 | -4.30674 | 1.94E-05 | 8.19E-05 | 1.579146 |
| RNF128   | -0.57364 | 6.18218  | -4.30012 | 2.00E-05 | 8.41E-05 | 1.55156  |
| LRIG1    | -0.60417 | 7.029012 | -4.29198 | 2.07E-05 | 8.67E-05 | 1.517695 |
| COX6C    | -0.56584 | 12.51407 | -4.28795 | 2.11E-05 | 8.80E-05 | 1.500921 |
| LCN2     | 0.6199   | 6.230564 | 4.285233 | 2.13E-05 | 8.90E-05 | 1.489658 |
| CHI3L1   | 0.595135 | 7.258556 | 4.262952 | 2.35E-05 | 9.71E-05 | 1.397416 |
| APOBEC3B | 0.519462 | 7.485678 | 4.259666 | 2.39E-05 | 9.83E-05 | 1.383848 |
| C1orf54  | 0.535941 | 8.710455 | 4.208896 | 2.97E-05 | 0.00012  | 1.175502 |
| FOXM1    | 0.521601 | 6.603657 | 4.207822 | 2.98E-05 | 0.00012  | 1.17112  |
| CGA      | -0.53832 | 4.304083 | -4.19235 | 3.19E-05 | 0.000128 | 1.10809  |
| ESRRG    | -0.51864 | 5.950861 | -4.19067 | 3.21E-05 | 0.000129 | 1.101283 |
| LTF      | 0.896988 | 9.738503 | 4.172233 | 3.47E-05 | 0.000138 | 1.026508 |
| RPL27A   | -0.50872 | 8.736489 | -4.12578 | 4.23E-05 | 0.000165 | 0.839473 |
| CAMK2N1  | -0.53175 | 8.430173 | -4.12555 | 4.23E-05 | 0.000165 | 0.838562 |
| FCGBP    | -0.52013 | 7.110536 | -4.11522 | 4.42E-05 | 0.000172 | 0.797247 |
| CDKN3    | 0.521475 | 7.083685 | 4.099818 | 4.72E-05 | 0.000183 | 0.735833 |
| ZNF813   | -0.51056 | 7.051223 | -4.07203 | 5.30E-05 | 0.000203 | 0.625546 |
| MMP1     | 0.85801  | 6.826843 | 4.036856 | 6.14E-05 | 0.000231 | 0.487006 |

|          |          |          |          |          |          |          |
|----------|----------|----------|----------|----------|----------|----------|
| GGH      | 0.592522 | 8.098832 | 3.999879 | 7.15E-05 | 0.000265 | 0.342572 |
| TCEAL4   | -0.6256  | 10.43129 | -3.95354 | 8.64E-05 | 0.000312 | 0.163349 |
| DIO1     | -0.65525 | 5.362581 | -3.8549  | 0.000129 | 0.000449 | -0.21155 |
| COL11A1  | -0.70237 | 8.453076 | -3.84031 | 0.000136 | 0.000473 | -0.26627 |
| H2AFJ    | -0.52926 | 7.392434 | -3.83924 | 0.000137 | 0.000475 | -0.27028 |
| CALML5   | 0.738645 | 6.704357 | 3.823949 | 0.000145 | 0.000501 | -0.32735 |
| TNNT1    | -0.59211 | 6.647875 | -3.82181 | 0.000147 | 0.000505 | -0.33531 |
| ZNF160   | -0.57924 | 7.659492 | -3.79779 | 0.000161 | 0.000549 | -0.42454 |
| SERPINA6 | -0.55483 | 4.662846 | -3.76054 | 0.000187 | 0.000626 | -0.5618  |
| MSMB     | -0.53796 | 4.81721  | -3.75926 | 0.000188 | 0.000629 | -0.56649 |
| COL2A1   | -0.51562 | 5.200284 | -3.75623 | 0.00019  | 0.000636 | -0.57759 |
| XBP1     | -0.52869 | 10.33811 | -3.68241 | 0.000252 | 0.000819 | -0.84551 |
| BBOX1    | 0.537772 | 5.836361 | 3.679912 | 0.000255 | 0.000826 | -0.85448 |
| FBXW12   | -0.5846  | 7.203081 | -3.66425 | 0.000271 | 0.000871 | -0.91065 |
| CP       | 0.638164 | 6.576715 | 3.629831 | 0.000308 | 0.000979 | -1.03324 |
| ARHGAP29 | -0.52591 | 7.163747 | -3.62338 | 0.000316 | 0.001    | -1.05608 |
| CHRD1    | 0.511032 | 7.425124 | 3.609998 | 0.000332 | 0.001045 | -1.10338 |
| DUSP4    | -0.52089 | 8.497033 | -3.60088 | 0.000344 | 0.001077 | -1.13551 |
| CSTA     | 0.548675 | 8.559299 | 3.569418 | 0.000387 | 0.001195 | -1.24576 |
| MGP      | -0.53534 | 11.66693 | -3.54287 | 0.000427 | 0.001306 | -1.33805 |
| KRT19    | -0.6099  | 10.13604 | -3.47586 | 0.000547 | 0.001631 | -1.56812 |
| DDAH1    | -0.50065 | 7.787114 | -3.4475  | 0.000606 | 0.00179  | -1.66423 |
| SERPINB6 | -0.54462 | 7.436353 | -3.41636 | 0.000679 | 0.001976 | -1.76887 |
| SOX11    | 0.508135 | 6.091456 | 3.392678 | 0.000739 | 0.002137 | -1.84784 |
| EN1      | 0.513469 | 5.675737 | 3.316451 | 0.000968 | 0.00272  | -2.09845 |
| TCN1     | -0.60963 | 6.27866  | -3.27623 | 0.001114 | 0.003076 | -2.22848 |
| ELF5     | 0.566468 | 6.227691 | 3.273804 | 0.001124 | 0.003101 | -2.23626 |
| ZNF91    | -0.52769 | 7.863352 | -3.26749 | 0.001149 | 0.003165 | -2.25651 |
| GABRP    | 0.71202  | 7.709075 | 3.166686 | 0.001622 | 0.004309 | -2.57483 |
| PMP22    | -0.58306 | 8.514176 | -3.15874 | 0.001666 | 0.00441  | -2.5995  |
| IGHG1    | 0.736176 | 5.242477 | 2.999973 | 0.002815 | 0.007007 | -3.08008 |
| KRT6A    | 0.569758 | 5.040791 | 2.828407 | 0.004838 | 0.011294 | -3.57236 |
| S100A7   | 0.716491 | 5.980586 | 2.826762 | 0.004863 | 0.01134  | -3.57694 |
| SCGB1D2  | -0.74562 | 7.859455 | -2.7662  | 0.00585  | 0.013321 | -3.74388 |
| SCGB2A2  | -0.78924 | 10.11289 | -2.71399 | 0.006844 | 0.015332 | -3.88498 |
| RHOB     | -0.53635 | 7.794269 | -2.47131 | 0.013745 | 0.028159 | -4.50634 |
