# Supplementary material for: ATP2C2 Has Potential to Define Tumor Microenvironment in Breast Cancer
Source: PubMed Central journal article supplement (PMC8079766; doi:10.3389/fimmu.2021.657950), 2021-04-14
Supplement: DataSheet_2.pdf [file DataSheet_2.pdf]

| id       | logFC    | AveExpr  | t        | P.Value  | adj.P.Val | B        |
|----------|----------|----------|----------|----------|-----------|----------|
| OLFML1   | 1.649707 | 6.930069 | 22.84731 | 4.41E-83 | 5.28E-79  | 178.4841 |
| GLT8D2   | 1.623757 | 8.313142 | 22.16376 | 1.71E-79 | 1.02E-75  | 170.2868 |
| CTSK     | 1.65795  | 11.00417 | 21.64999 | 8.42E-77 | 2.67E-73  | 164.1385 |
| SERPINF1 | 1.38423  | 10.65813 | 21.64527 | 8.91E-77 | 2.67E-73  | 164.0821 |
| CXCL12   | 1.594582 | 9.340667 | 21.44154 | 1.04E-75 | 2.48E-72  | 161.6482 |
| OMD      | 2.210011 | 6.21798  | 21.1445  | 3.69E-74 | 7.36E-71  | 158.1041 |
| SFRP4    | 2.272276 | 8.627152 | 21.09915 | 6.36E-74 | 1.09E-70  | 157.5636 |
| GAS7     | 1.011704 | 7.076307 | 21.00986 | 1.86E-73 | 2.78E-70  | 156.4997 |
| LRRC32   | 1.392355 | 7.791579 | 20.83428 | 1.53E-72 | 2.03E-69  | 154.4097 |
| ECM2     | 1.326506 | 7.204347 | 20.12438 | 7.43E-69 | 8.48E-66  | 145.9863 |
| C1R      | 1.20125  | 10.08006 | 20.12008 | 7.82E-69 | 8.48E-66  | 145.9355 |
| ZCCHC24  | 1.363531 | 8.791582 | 20.11313 | 8.50E-69 | 8.48E-66  | 145.8532 |
| VCAN     | 1.667853 | 10.22492 | 19.86981 | 1.54E-67 | 1.42E-64  | 142.9778 |
| FBN1     | 1.471981 | 9.184823 | 19.59044 | 4.26E-66 | 3.64E-63  | 139.6846 |
| NID2     | 1.494307 | 8.633354 | 19.37692 | 5.35E-65 | 4.27E-62  | 137.1741 |
| LOXL1    | 1.342528 | 9.219215 | 19.30532 | 1.25E-64 | 9.34E-62  | 136.3335 |
| DACT1    | 1.740125 | 7.007571 | 18.79792 | 4.95E-62 | 3.49E-59  | 130.3968 |
| CD93     | 1.060401 | 8.240615 | 18.51495 | 1.37E-60 | 9.11E-58  | 127.1024 |
| HTRA1    | 1.513344 | 10.63465 | 18.40866 | 4.75E-60 | 2.99E-57  | 125.8683 |
| SPARCL1  | 1.568823 | 11.3198  | 18.3325  | 1.16E-59 | 6.92E-57  | 124.9852 |
| MFAP4    | 2.395064 | 6.856066 | 18.26949 | 2.42E-59 | 1.38E-56  | 124.2552 |
| PDGFRL   | 1.549523 | 8.180361 | 18.25277 | 2.94E-59 | 1.60E-56  | 124.0617 |
| F13A1    | 1.661031 | 8.422962 | 17.75178 | 9.92E-57 | 5.16E-54  | 118.2845 |
| SRPX     | 1.560379 | 8.820557 | 17.42216 | 4.46E-55 | 2.22E-52  | 114.5093 |
| PTRF     | 1.247069 | 8.513412 | 17.3869  | 6.69E-55 | 3.20E-52  | 114.1067 |
| ZFPM2    | 1.389467 | 6.567842 | 17.34571 | 1.07E-54 | 4.94E-52  | 113.6368 |
| FAP      | 1.511734 | 8.536775 | 17.13855 | 1.16E-53 | 5.13E-51  | 111.2788 |
| DPT      | 1.452926 | 7.815564 | 17.03337 | 3.85E-53 | 1.65E-50  | 110.0852 |
| OGN      | 2.71015  | 6.72219  | 16.76472 | 8.23E-52 | 3.40E-49  | 107.0476 |
| OLFML2B  | 1.189139 | 8.601703 | 16.6933  | 1.85E-51 | 7.39E-49  | 106.2429 |
| IGFBP6   | 1.129438 | 7.805281 | 16.65891 | 2.74E-51 | 1.06E-48  | 105.8558 |
| ALDH1A1  | 1.665625 | 7.156802 | 16.62644 | 3.96E-51 | 1.48E-48  | 105.4905 |
| COL15A1  | 1.370792 | 9.443026 | 16.45981 | 2.61E-50 | 9.45E-48  | 103.6205 |
| TGFB1I1  | 1.158445 | 8.947354 | 16.41196 | 4.47E-50 | 1.57E-47  | 103.0847 |
| SPOCK1   | 1.761337 | 7.85046  | 16.27029 | 2.21E-49 | 7.54E-47  | 101.5019 |
| WISP2    | 1.776462 | 7.135452 | 16.24092 | 3.07E-49 | 1.02E-46  | 101.1744 |
| THBS2    | 1.420034 | 10.86733 | 16.20265 | 4.72E-49 | 1.53E-46  | 100.7479 |
| JAM2     | 1.126261 | 7.196279 | 16.17418 | 6.49E-49 | 2.04E-46  | 100.4309 |
| CFH      | 1.395304 | 7.883996 | 16.14393 | 9.11E-49 | 2.80E-46  | 100.0944 |
| F2R      | 0.941804 | 7.446266 | 16.12543 | 1.12E-48 | 3.36E-46  | 99.88866 |
| BICC1    | 0.893851 | 6.32647  | 16.07648 | 1.94E-48 | 5.66E-46  | 99.34476 |
| ANGPTL2  | 1.096324 | 7.563802 | 16.06563 | 2.19E-48 | 6.16E-46  | 99.22428 |
| HTR2B    | 1.600063 | 5.656085 | 16.06471 | 2.21E-48 | 6.16E-46  | 99.2141  |

|          |          |          |          |          |          |          |
|----------|----------|----------|----------|----------|----------|----------|
| LUM      | 1.363773 | 10.9703  | 15.97058 | 6.34E-48 | 1.73E-45 | 98.17027 |
| GEM      | 1.340559 | 9.152872 | 15.92153 | 1.10E-47 | 2.92E-45 | 97.6273  |
| CPA3     | 2.183863 | 7.621577 | 15.83169 | 2.98E-47 | 7.76E-45 | 96.63459 |
| CILP     | 2.153293 | 9.405533 | 15.73608 | 8.63E-47 | 2.20E-44 | 95.58046 |
| TCF4     | 0.977729 | 9.438209 | 15.57785 | 4.99E-46 | 1.24E-43 | 93.84161 |
| IGF1     | 1.371943 | 7.342674 | 15.52168 | 9.27E-46 | 2.26E-43 | 93.22617 |
| NAP1L3   | 1.418527 | 6.238253 | 15.38369 | 4.24E-45 | 1.02E-42 | 91.71795 |
| S1PR1    | 0.944068 | 6.646851 | 15.35651 | 5.72E-45 | 1.34E-42 | 91.42152 |
| CD99     | 0.86942  | 10.62502 | 15.34604 | 6.42E-45 | 1.48E-42 | 91.30736 |
| EMCN     | 1.428556 | 6.836727 | 15.33567 | 7.19E-45 | 1.62E-42 | 91.19443 |
| OLFML3   | 1.263743 | 9.415555 | 15.24518 | 1.94E-44 | 4.30E-42 | 90.2098  |
| ITGBL1   | 1.222461 | 7.615078 | 15.0485  | 1.67E-43 | 3.63E-41 | 88.0783  |
| HEG1     | 0.93312  | 8.566096 | 14.97526 | 3.70E-43 | 7.90E-41 | 87.28767 |
| ASPN     | 1.911329 | 9.293933 | 14.9601  | 4.36E-43 | 9.16E-41 | 87.12419 |
| COL8A2   | 1.287642 | 7.532454 | 14.95737 | 4.49E-43 | 9.27E-41 | 87.09476 |
| AXL      | 0.957623 | 7.459112 | 14.89028 | 9.31E-43 | 1.89E-40 | 86.37244 |
| COL6A3   | 1.32548  | 12.14755 | 14.85105 | 1.42E-42 | 2.84E-40 | 85.95081 |
| MN1      | 1.448213 | 6.667697 | 14.83502 | 1.69E-42 | 3.32E-40 | 85.77853 |
| CTGF     | 1.730136 | 10.30943 | 14.82921 | 1.80E-42 | 3.48E-40 | 85.71617 |
| CD200    | 0.883416 | 6.893425 | 14.78452 | 2.93E-42 | 5.56E-40 | 85.23673 |
| CD248    | 0.845364 | 8.343162 | 14.74685 | 4.40E-42 | 8.22E-40 | 84.83311 |
| FBLN1    | 0.963718 | 7.340457 | 14.70367 | 7.01E-42 | 1.29E-39 | 84.37096 |
| AEBP1    | 1.419481 | 10.54764 | 14.67712 | 9.33E-42 | 1.69E-39 | 84.0871  |
| LTBP2    | 0.954304 | 9.09677  | 14.67113 | 9.95E-42 | 1.78E-39 | 84.02316 |
| FAT4     | 1.207524 | 5.940509 | 14.62934 | 1.56E-41 | 2.75E-39 | 83.5769  |
| PRRX1    | 1.181316 | 8.170053 | 14.56396 | 3.15E-41 | 5.47E-39 | 82.88001 |
| LHFP     | 1.314879 | 8.497961 | 14.49993 | 6.27E-41 | 1.07E-38 | 82.19896 |
| ISLR     | 0.974757 | 8.51182  | 14.48514 | 7.34E-41 | 1.24E-38 | 82.0419  |
| THY1     | 0.821012 | 9.064003 | 14.45976 | 9.64E-41 | 1.60E-38 | 81.77238 |
| EML1     | 0.836345 | 6.118813 | 14.41287 | 1.59E-40 | 2.61E-38 | 81.27522 |
| FOXF2    | 1.014036 | 6.293215 | 14.37491 | 2.39E-40 | 3.86E-38 | 80.87324 |
| TSPAN4   | 0.886909 | 8.129949 | 14.36835 | 2.56E-40 | 4.09E-38 | 80.80378 |
| CDH11    | 1.244155 | 8.678355 | 14.35726 | 2.88E-40 | 4.54E-38 | 80.68654 |
| CAV1     | 1.374342 | 9.490003 | 14.25082 | 8.95E-40 | 1.39E-37 | 79.56278 |
| SNAI2    | 1.086398 | 9.201338 | 14.18674 | 1.77E-39 | 2.71E-37 | 78.88813 |
| PDGFRB   | 0.956473 | 8.675755 | 14.16056 | 2.33E-39 | 3.54E-37 | 78.61292 |
| KIAA1462 | 0.783199 | 6.181118 | 14.11343 | 3.85E-39 | 5.75E-37 | 78.11818 |
| DPYSL3   | 1.10004  | 7.362114 | 14.10853 | 4.05E-39 | 5.98E-37 | 78.06679 |
| NBL1     | 1.137203 | 8.942319 | 14.10165 | 4.36E-39 | 6.36E-37 | 77.99467 |
| SPON1    | 1.107218 | 6.929197 | 13.96355 | 1.87E-38 | 2.70E-36 | 76.55015 |
| LAMP5    | 1.461806 | 7.20202  | 13.86698 | 5.16E-38 | 7.35E-36 | 75.54425 |
| TPST1    | 0.72585  | 7.303598 | 13.8575  | 5.70E-38 | 8.03E-36 | 75.44572 |
| TSPAN7   | 1.314804 | 6.552023 | 13.85221 | 6.03E-38 | 8.33E-36 | 75.39069 |
| ACKR1    | 1.640402 | 7.126615 | 13.85173 | 6.06E-38 | 8.33E-36 | 75.38574 |

|          |          |          |          |          |          |          |
|----------|----------|----------|----------|----------|----------|----------|
| RCAN2    | 0.824479 | 7.469698 | 13.84606 | 6.43E-38 | 8.74E-36 | 75.32684 |
| CPE      | 1.341455 | 8.918289 | 13.79243 | 1.13E-37 | 1.52E-35 | 74.77011 |
| PDE2A    | 0.904324 | 6.042953 | 13.71966 | 2.41E-37 | 3.21E-35 | 74.0165  |
| EDNRA    | 1.007716 | 7.93938  | 13.64219 | 5.41E-37 | 7.11E-35 | 73.21651 |
| ANXA5    | 0.73004  | 11.39893 | 13.63934 | 5.57E-37 | 7.24E-35 | 73.18719 |
| RUNX1T1  | 0.77227  | 5.573909 | 13.60624 | 7.86E-37 | 1.01E-34 | 72.84602 |
| COL3A1   | 1.064987 | 12.35495 | 13.60341 | 8.09E-37 | 1.03E-34 | 72.8169  |
| SEMA5A   | 1.139722 | 7.275675 | 13.58626 | 9.67E-37 | 1.22E-34 | 72.64037 |
| FHL1     | 1.088711 | 7.21407  | 13.54395 | 1.50E-36 | 1.87E-34 | 72.20539 |
| ID3      | 1.119016 | 8.489312 | 13.50431 | 2.26E-36 | 2.79E-34 | 71.79845 |
| MFAP2    | 1.147068 | 9.088731 | 13.50173 | 2.32E-36 | 2.84E-34 | 71.77199 |
| ADRB2    | 0.942649 | 6.486513 | 13.46763 | 3.31E-36 | 4.00E-34 | 71.42246 |
| AOX1     | 0.940672 | 5.645684 | 13.46046 | 3.56E-36 | 4.26E-34 | 71.34903 |
| MFAP5    | 1.442968 | 8.320578 | 13.38161 | 8.03E-36 | 9.52E-34 | 70.54282 |
| MXRA5    | 1.182057 | 11.11449 | 13.37805 | 8.33E-36 | 9.78E-34 | 70.50647 |
| HRH1     | 0.628931 | 5.918239 | 13.36872 | 9.17E-36 | 1.07E-33 | 70.41123 |
| COLEC12  | 1.180282 | 8.282792 | 13.33425 | 1.31E-35 | 1.50E-33 | 70.0598  |
| LAMA2    | 0.950882 | 6.166487 | 13.32122 | 1.50E-35 | 1.70E-33 | 69.92705 |
| PKD2     | 0.885773 | 7.915691 | 13.28354 | 2.20E-35 | 2.49E-33 | 69.54364 |
| MAGEL2   | 0.9749   | 4.466605 | 13.26126 | 2.77E-35 | 3.10E-33 | 69.31709 |
| CH25H    | 1.273671 | 6.196395 | 13.23663 | 3.56E-35 | 3.95E-33 | 69.06707 |
| DPYSL2   | 0.802988 | 10.36904 | 13.20836 | 4.76E-35 | 5.22E-33 | 68.78029 |
| PROS1    | 1.255001 | 7.572309 | 13.20152 | 5.10E-35 | 5.55E-33 | 68.71089 |
| SLIT2    | 0.970515 | 7.902494 | 13.18389 | 6.11E-35 | 6.59E-33 | 68.53228 |
| PCOLCE   | 1.064474 | 9.586613 | 13.16667 | 7.29E-35 | 7.79E-33 | 68.35802 |
| POLD2    | -0.70107 | 8.768545 | -13.1597 | 7.83E-35 | 8.29E-33 | 68.28722 |
| MRC1     | 1.36197  | 7.329689 | 13.11359 | 1.25E-34 | 1.32E-32 | 67.82132 |
| BACE1    | 0.640678 | 7.069548 | 13.09093 | 1.58E-34 | 1.64E-32 | 67.5926  |
| ADRA2A   | 1.305919 | 7.228974 | 13.08372 | 1.70E-34 | 1.75E-32 | 67.51995 |
| SHOX2    | 0.667552 | 5.705759 | 13.07987 | 1.77E-34 | 1.81E-32 | 67.48104 |
| EFEMP2   | 0.737562 | 8.666211 | 13.06569 | 2.04E-34 | 2.07E-32 | 67.33816 |
| FBLN5    | 1.194283 | 8.115462 | 13.04278 | 2.58E-34 | 2.59E-32 | 67.10738 |
| NRN1     | 1.025403 | 7.366767 | 12.93884 | 7.39E-34 | 7.37E-32 | 66.06314 |
| PLN      | 1.053868 | 5.387819 | 12.7352  | 5.75E-33 | 5.69E-31 | 64.03065 |
| TM6SF1   | 0.779144 | 6.716347 | 12.72938 | 6.10E-33 | 5.98E-31 | 63.97286 |
| SERPING1 | 1.016492 | 10.08071 | 12.69114 | 8.95E-33 | 8.71E-31 | 63.59331 |
| PRELP    | 1.038038 | 7.512336 | 12.62088 | 1.81E-32 | 1.74E-30 | 62.89768 |
| CPED1    | 0.676717 | 6.557829 | 12.60084 | 2.21E-32 | 2.11E-30 | 62.69966 |
| CORO2B   | 0.981309 | 4.709103 | 12.58864 | 2.49E-32 | 2.37E-30 | 62.57913 |
| FXYD1    | 1.250829 | 5.975948 | 12.55493 | 3.49E-32 | 3.28E-30 | 62.24667 |
| PLSCR4   | 1.083298 | 8.115726 | 12.54406 | 3.88E-32 | 3.63E-30 | 62.13961 |
| HSD17B11 | 0.866695 | 8.672787 | 12.49499 | 6.33E-32 | 5.87E-30 | 61.65672 |
| SLC25A10 | -0.66735 | 7.004878 | -12.4492 | 9.96E-32 | 9.17E-30 | 61.20759 |
| LAMB1    | 0.981538 | 8.946306 | 12.44649 | 1.02E-31 | 9.35E-30 | 61.18056 |

|          |          |          |          |          |          |          |
|----------|----------|----------|----------|----------|----------|----------|
| SGCD     | 0.823046 | 5.61752  | 12.40531 | 1.54E-31 | 1.39E-29 | 60.77716 |
| MXRA8    | 0.952243 | 9.622028 | 12.39732 | 1.66E-31 | 1.50E-29 | 60.69888 |
| CLIC2    | 1.077033 | 6.722283 | 12.35131 | 2.62E-31 | 2.34E-29 | 60.24928 |
| TREM2    | 1.143905 | 7.262986 | 12.33086 | 3.21E-31 | 2.84E-29 | 60.04971 |
| COMP     | 1.688342 | 8.640525 | 12.31577 | 3.72E-31 | 3.27E-29 | 59.90251 |
| ZMAT3    | 0.71129  | 7.570403 | 12.30942 | 3.96E-31 | 3.46E-29 | 59.84067 |
| FGL2     | 1.11846  | 8.267236 | 12.23233 | 8.44E-31 | 7.32E-29 | 59.09097 |
| COL1A2   | 1.049392 | 12.61474 | 12.22885 | 8.74E-31 | 7.52E-29 | 59.05716 |
| IL33     | 1.466526 | 5.675567 | 12.21535 | 9.97E-31 | 8.53E-29 | 58.92615 |
| COL6A2   | 0.809158 | 9.160295 | 12.2082  | 1.07E-30 | 9.08E-29 | 58.85683 |
| LPAR1    | 0.636651 | 7.522495 | 12.18649 | 1.32E-30 | 1.11E-28 | 58.64639 |
| TMEM255A | 1.054527 | 5.329792 | 12.18648 | 1.32E-30 | 1.11E-28 | 58.6463  |
| KERA     | 1.340365 | 4.530507 | 12.1701  | 1.55E-30 | 1.29E-28 | 58.48771 |
| IFFO1    | 0.645789 | 7.152858 | 12.16442 | 1.64E-30 | 1.36E-28 | 58.43277 |
| DCHS1    | 0.678834 | 6.644312 | 12.11281 | 2.72E-30 | 2.23E-28 | 57.934   |
| CENPF    | -1.00295 | 6.149881 | -12.0989 | 3.11E-30 | 2.53E-28 | 57.79948 |
| ELK3     | 0.51046  | 7.343788 | 12.0793  | 3.77E-30 | 3.05E-28 | 57.61087 |
| MEIS1    | 0.708721 | 6.54511  | 12.05227 | 4.90E-30 | 3.91E-28 | 57.35064 |
| SOD3     | 0.868693 | 6.815416 | 12.02287 | 6.52E-30 | 5.17E-28 | 57.06791 |
| MARCKS   | 0.662748 | 9.456232 | 12.02067 | 6.66E-30 | 5.24E-28 | 57.0468  |
| FMO1     | 1.241298 | 7.157991 | 12.01044 | 7.35E-30 | 5.75E-28 | 56.94857 |
| GFPT2    | 0.695531 | 7.266697 | 11.99708 | 8.37E-30 | 6.51E-28 | 56.82034 |
| SPARC    | 1.03831  | 12.03765 | 11.98585 | 9.33E-30 | 7.21E-28 | 56.71257 |
| GPR65    | 1.29704  | 6.950557 | 11.93208 | 1.57E-29 | 1.21E-27 | 56.19758 |
| FERMT2   | 0.712828 | 8.191084 | 11.92356 | 1.71E-29 | 1.30E-27 | 56.11612 |
| PAICS    | -0.56103 | 7.798346 | -11.8972 | 2.20E-29 | 1.67E-27 | 55.86461 |
| RASSF2   | 0.781658 | 7.811549 | 11.89499 | 2.25E-29 | 1.69E-27 | 55.84321 |
| FYN      | 0.622901 | 7.394268 | 11.88967 | 2.37E-29 | 1.77E-27 | 55.79238 |
| PDGFD    | 0.934577 | 7.343994 | 11.88912 | 2.38E-29 | 1.77E-27 | 55.78717 |
| SELP     | 0.849834 | 6.592037 | 11.86691 | 2.95E-29 | 2.18E-27 | 55.57535 |
| TNFAIP6  | 0.978363 | 8.23309  | 11.84943 | 3.49E-29 | 2.56E-27 | 55.40879 |
| COL5A1   | 1.105429 | 9.149537 | 11.84571 | 3.61E-29 | 2.64E-27 | 55.37331 |
| ELN      | 1.242033 | 6.450521 | 11.82278 | 4.50E-29 | 3.27E-27 | 55.15511 |
| RNASE6   | 1.212178 | 7.625096 | 11.81635 | 4.79E-29 | 3.45E-27 | 55.09403 |
| THBS4    | 1.464789 | 8.189721 | 11.7036  | 1.41E-28 | 1.01E-26 | 54.02519 |
| ZFP36    | 0.966741 | 9.483728 | 11.70289 | 1.42E-28 | 1.01E-26 | 54.01843 |
| NOV      | 1.007335 | 6.440402 | 11.70264 | 1.42E-28 | 1.01E-26 | 54.0161  |
| AQP1     | 0.939892 | 8.348531 | 11.67355 | 1.88E-28 | 1.32E-26 | 53.7414  |
| CYTL1    | 0.955624 | 5.036593 | 11.65897 | 2.16E-28 | 1.51E-26 | 53.60381 |
| KCTD12   | 0.887126 | 9.923752 | 11.65709 | 2.20E-28 | 1.53E-26 | 53.5861  |
| MMP3     | 1.646991 | 7.771158 | 11.63739 | 2.65E-28 | 1.84E-26 | 53.4005  |
| COL5A2   | 1.338127 | 10.57919 | 11.58744 | 4.27E-28 | 2.93E-26 | 52.93065 |
| TLR7     | 0.895763 | 6.224212 | 11.57507 | 4.80E-28 | 3.28E-26 | 52.81452 |
| DDR2     | 0.792505 | 7.61267  | 11.57279 | 4.90E-28 | 3.33E-26 | 52.79308 |

|          |          |          |          |          |          |          |
|----------|----------|----------|----------|----------|----------|----------|
| ITM2A    | 1.201889 | 8.34982  | 11.56968 | 5.05E-28 | 3.41E-26 | 52.76392 |
| TOP2A    | -1.22716 | 7.478104 | -11.558  | 5.64E-28 | 3.79E-26 | 52.65421 |
| ADD3     | 0.941318 | 9.719276 | 11.55122 | 6.01E-28 | 4.02E-26 | 52.59076 |
| GREM1    | 1.209267 | 7.927461 | 11.53783 | 6.83E-28 | 4.54E-26 | 52.46527 |
| ZNF106   | 0.577054 | 8.34964  | 11.53419 | 7.07E-28 | 4.67E-26 | 52.43117 |
| CNN3     | 1.077075 | 9.491759 | 11.52889 | 7.43E-28 | 4.89E-26 | 52.38155 |
| PLEKHO2  | 0.535177 | 8.101243 | 11.52149 | 7.97E-28 | 5.21E-26 | 52.31228 |
| AKR1B1   | 0.647776 | 9.239688 | 11.51514 | 8.46E-28 | 5.50E-26 | 52.25284 |
| TIMP3    | 1.183522 | 9.697343 | 11.50203 | 9.58E-28 | 6.20E-26 | 52.13023 |
| SPRY1    | 0.77398  | 7.808831 | 11.49065 | 1.07E-27 | 6.86E-26 | 52.0239  |
| NID1     | 0.877322 | 7.300994 | 11.4786  | 1.20E-27 | 7.65E-26 | 51.91131 |
| MMP19    | 0.567744 | 6.277654 | 11.47774 | 1.21E-27 | 7.67E-26 | 51.9033  |
| YIPF5    | 0.735791 | 8.588211 | 11.47434 | 1.24E-27 | 7.88E-26 | 51.87152 |
| PAFAH1B3 | -0.73246 | 9.152935 | -11.4688 | 1.31E-27 | 8.26E-26 | 51.82006 |
| GYPC     | 0.822616 | 8.043856 | 11.46325 | 1.38E-27 | 8.66E-26 | 51.76802 |
| NCAPD2   | -0.80321 | 7.578669 | -11.4606 | 1.42E-27 | 8.83E-26 | 51.7435  |
| TRIM22   | 1.042123 | 9.461829 | 11.44692 | 1.61E-27 | 9.99E-26 | 51.61572 |
| GIMAP6   | 0.952142 | 7.718523 | 11.42864 | 1.91E-27 | 1.18E-25 | 51.44545 |
| CDC25C   | -0.51711 | 4.591553 | -11.417  | 2.13E-27 | 1.31E-25 | 51.33754 |
| ABCA6    | 1.109419 | 5.282051 | 11.4131  | 2.22E-27 | 1.35E-25 | 51.30081 |
| ATP10D   | 0.72293  | 7.535098 | 11.39666 | 2.59E-27 | 1.57E-25 | 51.14795 |
| CTSO     | 0.895668 | 8.502666 | 11.38078 | 3.00E-27 | 1.81E-25 | 51.00033 |
| CYR61    | 1.218786 | 9.33827  | 11.37026 | 3.31E-27 | 1.99E-25 | 50.90265 |
| TPSAB1   | 1.085599 | 7.017221 | 11.36447 | 3.50E-27 | 2.09E-25 | 50.84898 |
| BNC2     | 0.78738  | 6.660357 | 11.34398 | 4.24E-27 | 2.52E-25 | 50.65893 |
| PHYHIP   | 0.772678 | 4.731162 | 11.34282 | 4.29E-27 | 2.54E-25 | 50.64822 |
| TMEM140  | 0.593882 | 7.591097 | 11.28294 | 7.50E-27 | 4.42E-25 | 50.09418 |
| GUCY1B3  | 0.533614 | 7.220418 | 11.2738  | 8.17E-27 | 4.79E-25 | 50.00982 |
| IFITM3   | 0.74085  | 12.30111 | 11.26816 | 8.62E-27 | 5.03E-25 | 49.95769 |
| RBMS1    | 0.720569 | 9.497623 | 11.26307 | 9.03E-27 | 5.25E-25 | 49.91074 |
| CPVL     | 0.939349 | 7.548229 | 11.25188 | 1.00E-26 | 5.80E-25 | 49.80753 |
| WDHD1    | -0.64923 | 4.931984 | -11.2509 | 1.01E-26 | 5.82E-25 | 49.7982  |
| GPR153   | 0.558267 | 7.352033 | 11.24961 | 1.02E-26 | 5.87E-25 | 49.78666 |
| CHRD1    | 1.459827 | 7.425124 | 11.24744 | 1.05E-26 | 5.96E-25 | 49.76667 |
| NCAPG    | -1.1296  | 6.662853 | -11.2418 | 1.10E-26 | 6.25E-25 | 49.71507 |
| C3       | 1.108808 | 11.45328 | 11.2294  | 1.24E-26 | 6.98E-25 | 49.60045 |
| COPZ2    | 0.824201 | 7.285111 | 11.22672 | 1.27E-26 | 7.12E-25 | 49.57576 |
| ADAMTS2  | 0.804196 | 6.735704 | 11.21519 | 1.41E-26 | 7.89E-25 | 49.46964 |
| CLEC11A  | 0.665009 | 6.909436 | 11.19801 | 1.66E-26 | 9.22E-25 | 49.31165 |
| CAV2     | 0.780821 | 7.239201 | 11.18586 | 1.85E-26 | 1.03E-24 | 49.2     |
| PARP8    | 0.768    | 6.949741 | 11.1847  | 1.87E-26 | 1.03E-24 | 49.18937 |
| CDH5     | 0.746391 | 7.089033 | 11.18045 | 1.95E-26 | 1.07E-24 | 49.15039 |
| PCSK5    | 1.068582 | 6.340446 | 11.17539 | 2.04E-26 | 1.12E-24 | 49.10388 |
| RRNAD1   | -0.66699 | 7.257051 | -11.1725 | 2.10E-26 | 1.14E-24 | 49.07694 |

|           |          |          |          |          |          |          |
|-----------|----------|----------|----------|----------|----------|----------|
| PLXNC1    | 0.640484 | 6.953429 | 11.13997 | 2.84E-26 | 1.53E-24 | 48.77906 |
| CFI       | 0.88041  | 6.697277 | 11.12708 | 3.20E-26 | 1.70E-24 | 48.6611  |
| GAS6      | 0.77405  | 8.758392 | 11.12688 | 3.20E-26 | 1.70E-24 | 48.65925 |
| ASPM      | -1.30135 | 6.272718 | -11.1236 | 3.30E-26 | 1.75E-24 | 48.62923 |
| NOP2      | -0.68654 | 8.008462 | -11.1159 | 3.55E-26 | 1.87E-24 | 48.55839 |
| SH2B3     | 0.51476  | 7.651047 | 11.04352 | 6.92E-26 | 3.63E-24 | 47.89805 |
| COL14A1   | 1.108937 | 6.094535 | 11.04253 | 6.98E-26 | 3.65E-24 | 47.88899 |
| ENPP2     | 1.060692 | 8.315384 | 11.01895 | 8.67E-26 | 4.51E-24 | 47.67439 |
| COL10A1   | 1.6383   | 9.279545 | 11.00418 | 9.93E-26 | 5.15E-24 | 47.5401  |
| CD1C      | 1.006543 | 5.984288 | 10.99129 | 1.12E-25 | 5.72E-24 | 47.42307 |
| CDC25A    | -0.80632 | 5.318719 | -10.9709 | 1.35E-25 | 6.87E-24 | 47.23806 |
| SERINC1   | 0.665604 | 10.44907 | 10.96974 | 1.36E-25 | 6.91E-24 | 47.22744 |
| ANKEF1    | -0.86569 | 5.637827 | -10.9341 | 1.89E-25 | 9.54E-24 | 46.90461 |
| MCM7      | -0.62634 | 8.623956 | -10.924  | 2.07E-25 | 1.04E-23 | 46.81368 |
| CECR1     | 1.037833 | 8.404794 | 10.89373 | 2.73E-25 | 1.37E-23 | 46.53975 |
| GPRASP1   | 0.87319  | 6.489955 | 10.89145 | 2.79E-25 | 1.39E-23 | 46.51917 |
| DHX9      | -0.65205 | 7.405196 | -10.8675 | 3.47E-25 | 1.72E-23 | 46.30284 |
| GJA4      | 0.543127 | 6.754937 | 10.86412 | 3.58E-25 | 1.77E-23 | 46.27263 |
| HLA-DRA   | 1.213015 | 11.70093 | 10.85398 | 3.93E-25 | 1.93E-23 | 46.18133 |
| ACVR1     | 0.779468 | 8.810667 | 10.85393 | 3.93E-25 | 1.93E-23 | 46.18082 |
| LGALS1    | 0.653038 | 12.78524 | 10.8531  | 3.96E-25 | 1.93E-23 | 46.17336 |
| C14orf132 | 1.11188  | 7.080357 | 10.80908 | 5.91E-25 | 2.87E-23 | 45.77751 |
| EMILIN1   | 0.870242 | 7.212106 | 10.80782 | 5.98E-25 | 2.90E-23 | 45.76623 |
| STAT5A    | 0.604473 | 7.429377 | 10.79254 | 6.87E-25 | 3.31E-23 | 45.62902 |
| PMF1      | -0.50988 | 8.679042 | -10.7507 | 1.00E-24 | 4.82E-23 | 45.25435 |
| RAMP3     | 0.774914 | 7.247953 | 10.74742 | 1.03E-24 | 4.95E-23 | 45.22477 |
| ID1       | 1.015518 | 8.543663 | 10.73712 | 1.13E-24 | 5.41E-23 | 45.13265 |
| RARRES2   | 1.020524 | 9.260731 | 10.7249  | 1.27E-24 | 6.02E-23 | 45.0235  |
| MAN1C1    | 0.624256 | 6.979746 | 10.72264 | 1.29E-24 | 6.12E-23 | 45.00329 |
| CDC20     | -1.28127 | 7.959298 | -10.7176 | 1.35E-24 | 6.38E-23 | 44.95804 |
| GART      | -0.5399  | 6.26113  | -10.7057 | 1.51E-24 | 7.05E-23 | 44.85192 |
| PLCH1     | -0.7464  | 4.510534 | -10.7043 | 1.53E-24 | 7.11E-23 | 44.83942 |
| HPGDS     | 0.856368 | 6.266139 | 10.70059 | 1.58E-24 | 7.32E-23 | 44.80642 |
| CENPI     | -0.86139 | 4.789084 | -10.6975 | 1.62E-24 | 7.50E-23 | 44.77925 |
| ATP8B2    | 0.748684 | 7.223345 | 10.68427 | 1.83E-24 | 8.42E-23 | 44.66093 |
| THOC5     | -0.56813 | 6.179043 | -10.6701 | 2.08E-24 | 9.53E-23 | 44.53494 |
| POLR3G    | -0.70749 | 4.789003 | -10.6565 | 2.35E-24 | 1.07E-22 | 44.41338 |
| VGLL3     | 0.89149  | 6.113761 | 10.6539  | 2.40E-24 | 1.09E-22 | 44.39056 |
| SSPN      | 0.737084 | 7.176197 | 10.633   | 2.90E-24 | 1.32E-22 | 44.20479 |
| ZNF423    | 1.114988 | 7.555078 | 10.62928 | 3.00E-24 | 1.35E-22 | 44.17177 |
| ALOX5AP   | 1.237615 | 8.579316 | 10.61361 | 3.45E-24 | 1.55E-22 | 44.03265 |
| STIL      | -1.06496 | 7.302342 | -10.5987 | 3.95E-24 | 1.77E-22 | 43.90087 |
| LTC4S     | 0.802878 | 5.473642 | 10.59811 | 3.97E-24 | 1.77E-22 | 43.89524 |
| AKAP12    | 0.900691 | 6.713287 | 10.5727  | 4.98E-24 | 2.22E-22 | 43.67025 |

|           |          |          |          |          |          |          |
|-----------|----------|----------|----------|----------|----------|----------|
| DPP4      | 0.803164 | 5.590365 | 10.54105 | 6.62E-24 | 2.92E-22 | 43.39044 |
| LOX       | 0.804661 | 6.86001  | 10.51055 | 8.69E-24 | 3.82E-22 | 43.12137 |
| NINJ2     | 0.830894 | 7.190428 | 10.47778 | 1.16E-23 | 5.10E-22 | 42.83288 |
| XRCC2     | -0.79946 | 7.049268 | -10.433  | 1.73E-23 | 7.57E-22 | 42.4394  |
| ESPL1     | -0.80244 | 6.725874 | -10.4274 | 1.82E-23 | 7.92E-22 | 42.39075 |
| IL10RB    | 0.641791 | 8.043628 | 10.41699 | 2.00E-23 | 8.66E-22 | 42.29936 |
| AURKA     | -0.8532  | 6.60706  | -10.4059 | 2.20E-23 | 9.52E-22 | 42.20202 |
| SERPINH1  | 0.766828 | 9.924215 | 10.40112 | 2.30E-23 | 9.89E-22 | 42.16043 |
| TRIM24    | -0.51877 | 7.611612 | -10.4004 | 2.31E-23 | 9.92E-22 | 42.15378 |
| PAMR1     | 0.812145 | 6.122012 | 10.39875 | 2.35E-23 | 1.00E-21 | 42.13968 |
| TMEM243   | 0.783157 | 8.574119 | 10.3953  | 2.42E-23 | 1.03E-21 | 42.10944 |
| EVI2B     | 1.066858 | 8.232598 | 10.39233 | 2.48E-23 | 1.05E-21 | 42.08353 |
| CRISPLD2  | 0.957296 | 8.325934 | 10.37801 | 2.82E-23 | 1.18E-21 | 41.95833 |
| EBP       | -0.56386 | 7.359938 | -10.3779 | 2.82E-23 | 1.18E-21 | 41.9577  |
| CALCRL    | 0.688617 | 6.213904 | 10.31239 | 5.03E-23 | 2.11E-21 | 41.38626 |
| SEMA3C    | 0.92117  | 8.265107 | 10.28455 | 6.43E-23 | 2.66E-21 | 41.14431 |
| BACH2     | 0.636763 | 5.990431 | 10.28415 | 6.45E-23 | 2.66E-21 | 41.14084 |
| PARPBP    | -0.82232 | 4.783975 | -10.2694 | 7.34E-23 | 3.02E-21 | 41.01296 |
| TTF2      | -0.5935  | 5.38618  | -10.2569 | 8.20E-23 | 3.36E-21 | 40.90438 |
| PCYT1B    | -0.5764  | 4.136442 | -10.2539 | 8.41E-23 | 3.44E-21 | 40.87836 |
| AGK       | -0.52232 | 6.812468 | -10.2435 | 9.22E-23 | 3.75E-21 | 40.78807 |
| ITIH5     | 0.936891 | 6.369114 | 10.24318 | 9.24E-23 | 3.75E-21 | 40.78563 |
| FABP4     | 1.833406 | 8.355378 | 10.23693 | 9.76E-23 | 3.95E-21 | 40.73154 |
| KIF23     | -0.98035 | 5.880915 | -10.2104 | 1.23E-22 | 4.96E-21 | 40.50249 |
| NEK2      | -0.88204 | 6.338062 | -10.2079 | 1.26E-22 | 5.06E-21 | 40.48028 |
| IGFBP3    | 0.887521 | 9.163948 | 10.20001 | 1.35E-22 | 5.40E-21 | 40.41239 |
| CSF1R     | 0.662157 | 8.09538  | 10.18895 | 1.49E-22 | 5.93E-21 | 40.31697 |
| FST       | 0.847175 | 6.68768  | 10.18093 | 1.59E-22 | 6.34E-21 | 40.24778 |
| GIN52     | -0.80451 | 6.894012 | -10.1769 | 1.65E-22 | 6.54E-21 | 40.21304 |
| CCDC69    | 0.701373 | 6.213028 | 10.17481 | 1.68E-22 | 6.64E-21 | 40.19503 |
| PLIN1     | 1.399026 | 6.896288 | 10.16766 | 1.79E-22 | 7.04E-21 | 40.13341 |
| BUB1      | -0.67554 | 4.659357 | -10.1622 | 1.88E-22 | 7.34E-21 | 40.08609 |
| EZH2      | -1.00148 | 7.522    | -10.1463 | 2.15E-22 | 8.37E-21 | 39.94997 |
| WASF2     | 0.564627 | 8.793236 | 10.14089 | 2.26E-22 | 8.75E-21 | 39.90308 |
| WISP1     | 0.851814 | 5.813488 | 10.11227 | 2.90E-22 | 1.12E-20 | 39.65726 |
| DAAM2     | 0.587334 | 6.649562 | 10.10238 | 3.16E-22 | 1.22E-20 | 39.57237 |
| C1S       | 1.063819 | 9.823386 | 10.09825 | 3.27E-22 | 1.26E-20 | 39.53701 |
| HLX       | 0.525651 | 6.614543 | 10.08954 | 3.53E-22 | 1.35E-20 | 39.46238 |
| GMFG      | 0.693588 | 8.317252 | 10.08711 | 3.61E-22 | 1.37E-20 | 39.44155 |
| ITPKC     | -0.50926 | 7.095471 | -10.075  | 4.00E-22 | 1.52E-20 | 39.33795 |
| ACVRL1    | 0.538386 | 6.495814 | 10.06656 | 4.31E-22 | 1.63E-20 | 39.26563 |
| EPS8      | 0.66546  | 9.264861 | 10.06098 | 4.52E-22 | 1.71E-20 | 39.2179  |
| RAB11FIP2 | 0.615821 | 7.87226  | 10.05949 | 4.58E-22 | 1.72E-20 | 39.20515 |
| MAN2A1    | 0.574683 | 8.427256 | 10.03053 | 5.89E-22 | 2.20E-20 | 38.95782 |

|            |          |          |          |          |          |          |
|------------|----------|----------|----------|----------|----------|----------|
| KCND2      | 0.884493 | 5.216384 | 10.02622 | 6.11E-22 | 2.27E-20 | 38.92108 |
| HIGD1B     | 0.762117 | 5.727643 | 10.02615 | 6.11E-22 | 2.27E-20 | 38.92048 |
| PLS3       | 0.938103 | 10.39623 | 10.02536 | 6.15E-22 | 2.28E-20 | 38.91375 |
| ACOT8      | -0.53614 | 7.035454 | -10.0199 | 6.45E-22 | 2.38E-20 | 38.86688 |
| FMO4       | 0.619521 | 6.85752  | 9.992119 | 8.20E-22 | 3.00E-20 | 38.63053 |
| MRPS15     | -0.66434 | 7.894724 | -9.99205 | 8.20E-22 | 3.00E-20 | 38.62996 |
| GZMK       | 1.323298 | 7.159408 | 9.976605 | 9.37E-22 | 3.42E-20 | 38.4986  |
| RPS6KA3    | 0.6395   | 7.727269 | 9.961546 | 1.07E-21 | 3.88E-20 | 38.37068 |
| CHIC2      | 0.897818 | 8.016657 | 9.932283 | 1.37E-21 | 4.98E-20 | 38.12248 |
| GPX3       | 0.927579 | 8.707543 | 9.931124 | 1.39E-21 | 5.01E-20 | 38.11266 |
| AOC3       | 0.907302 | 7.629655 | 9.923554 | 1.48E-21 | 5.33E-20 | 38.04854 |
| MCM3AP-AS1 | -0.55976 | 5.31306  | -9.9189  | 1.54E-21 | 5.51E-20 | 38.00915 |
| PSAP       | 0.551916 | 11.97065 | 9.91215  | 1.63E-21 | 5.82E-20 | 37.95202 |
| CSGALNACT1 | 0.824773 | 7.483483 | 9.908737 | 1.68E-21 | 5.98E-20 | 37.92314 |
| PLK4       | -0.59035 | 4.825697 | -9.90699 | 1.70E-21 | 6.05E-20 | 37.9084  |
| CCPG1      | 0.531411 | 6.130453 | 9.904671 | 1.74E-21 | 6.16E-20 | 37.88876 |
| SLC15A3    | 0.731846 | 7.515096 | 9.899983 | 1.81E-21 | 6.39E-20 | 37.84912 |
| BNIP3L     | 0.629835 | 10.09992 | 9.872925 | 2.28E-21 | 8.01E-20 | 37.62062 |
| CCNJ       | -0.59112 | 5.917222 | -9.86944 | 2.35E-21 | 8.22E-20 | 37.59119 |
| NAA10      | -0.66607 | 8.653531 | -9.86362 | 2.47E-21 | 8.62E-20 | 37.54211 |
| NR3C1      | 0.554071 | 8.648072 | 9.853831 | 2.69E-21 | 9.34E-20 | 37.45964 |
| PTGIR      | 0.722685 | 5.720321 | 9.848918 | 2.80E-21 | 9.71E-20 | 37.41825 |
| TIMP1      | 0.665836 | 12.07244 | 9.844355 | 2.91E-21 | 1.01E-19 | 37.37983 |
| LIPA       | 0.752211 | 10.23624 | 9.832715 | 3.22E-21 | 1.11E-19 | 37.28186 |
| ADAM12     | 0.895907 | 7.086662 | 9.831295 | 3.25E-21 | 1.12E-19 | 37.26993 |
| MYBL1      | -0.95983 | 6.622592 | -9.81944 | 3.60E-21 | 1.23E-19 | 37.17026 |
| C10orf10   | 0.659343 | 7.802361 | 9.808762 | 3.94E-21 | 1.35E-19 | 37.08055 |
| C3AR1      | 0.719987 | 8.517678 | 9.808658 | 3.95E-21 | 1.35E-19 | 37.07967 |
| NUSAP1     | -0.92372 | 7.838995 | -9.80177 | 4.18E-21 | 1.42E-19 | 37.02186 |
| GPR183     | 0.939784 | 6.979719 | 9.799616 | 4.26E-21 | 1.44E-19 | 37.00377 |
| FAM49A     | 0.550209 | 6.227763 | 9.79378  | 4.48E-21 | 1.51E-19 | 36.9548  |
| HSD17B6    | 1.049769 | 5.900638 | 9.790442 | 4.61E-21 | 1.55E-19 | 36.92681 |
| TNN        | 1.097338 | 6.495261 | 9.787595 | 4.72E-21 | 1.58E-19 | 36.90293 |
| KCNJ8      | 0.574467 | 6.860866 | 9.782457 | 4.93E-21 | 1.65E-19 | 36.85986 |
| PRPF3      | -0.6134  | 8.356186 | -9.78131 | 4.98E-21 | 1.66E-19 | 36.85021 |
| RBL1       | -0.63112 | 4.97037  | -9.77639 | 5.19E-21 | 1.73E-19 | 36.80899 |
| ECT2       | -0.78868 | 6.423952 | -9.77363 | 5.31E-21 | 1.76E-19 | 36.78593 |
| RERGL      | 1.154411 | 4.817805 | 9.770929 | 5.44E-21 | 1.80E-19 | 36.76328 |
| MEIS2      | 0.955672 | 7.673199 | 9.753264 | 6.32E-21 | 2.08E-19 | 36.61544 |
| GNG11      | 0.697653 | 7.541477 | 9.750494 | 6.47E-21 | 2.13E-19 | 36.59228 |
| UBL3       | 0.867873 | 8.916214 | 9.747065 | 6.66E-21 | 2.18E-19 | 36.56361 |
| OLR1       | 1.206016 | 6.311515 | 9.742847 | 6.90E-21 | 2.26E-19 | 36.52835 |
| GLI1       | 0.831862 | 5.277628 | 9.73964  | 7.09E-21 | 2.31E-19 | 36.50156 |
| TCN2       | 0.693381 | 6.975998 | 9.733037 | 7.50E-21 | 2.44E-19 | 36.4464  |

|           |          |          |          |          |          |          |
|-----------|----------|----------|----------|----------|----------|----------|
| HIST1H2AL | -0.79315 | 4.035631 | -9.71475 | 8.75E-21 | 2.84E-19 | 36.29376 |
| MOSPD3    | -0.58639 | 7.654349 | -9.71045 | 9.08E-21 | 2.94E-19 | 36.25792 |
| HOXA5     | 0.847255 | 6.571823 | 9.681587 | 1.16E-20 | 3.73E-19 | 36.01757 |
| PLEKHO1   | 0.705447 | 7.801611 | 9.659242 | 1.40E-20 | 4.47E-19 | 35.83183 |
| RAD51     | -0.56326 | 5.251915 | -9.65365 | 1.47E-20 | 4.68E-19 | 35.7854  |
| FAXDC2    | 0.715982 | 7.071202 | 9.651862 | 1.49E-20 | 4.73E-19 | 35.77056 |
| NUP54     | -0.60822 | 5.906988 | -9.64302 | 1.60E-20 | 5.07E-19 | 35.69718 |
| SGPP1     | 0.699115 | 6.88505  | 9.635868 | 1.70E-20 | 5.37E-19 | 35.63788 |
| DCN       | 1.203877 | 9.806107 | 9.623505 | 1.89E-20 | 5.94E-19 | 35.53543 |
| TENM4     | 0.636532 | 6.261677 | 9.623288 | 1.89E-20 | 5.94E-19 | 35.53364 |
| FABP2     | -0.7737  | 4.169976 | -9.62158 | 1.92E-20 | 6.01E-19 | 35.51947 |
| CSF2RB    | 0.937604 | 7.431417 | 9.617077 | 1.99E-20 | 6.23E-19 | 35.48221 |
| SLC38A2   | 0.500772 | 11.01286 | 9.612612 | 2.07E-20 | 6.45E-19 | 35.44524 |
| CIDEA     | 0.839715 | 5.149905 | 9.605672 | 2.19E-20 | 6.82E-19 | 35.38782 |
| GTSE1     | -0.69724 | 6.425736 | -9.59145 | 2.47E-20 | 7.66E-19 | 35.27024 |
| ZDHHC13   | -0.5912  | 6.982461 | -9.57865 | 2.75E-20 | 8.48E-19 | 35.16452 |
| EMX2      | 0.733065 | 4.568961 | 9.565204 | 3.08E-20 | 9.47E-19 | 35.05359 |
| RASA1     | 0.617733 | 9.00704  | 9.55622  | 3.32E-20 | 1.02E-18 | 34.97954 |
| TXNIP     | 0.757238 | 11.46656 | 9.55477  | 3.36E-20 | 1.03E-18 | 34.96759 |
| SEC23A    | 0.638238 | 8.018766 | 9.548143 | 3.55E-20 | 1.08E-18 | 34.913   |
| PINLYP    | 0.627615 | 5.639717 | 9.544517 | 3.66E-20 | 1.11E-18 | 34.88314 |
| ITM2B     | 0.586923 | 11.89756 | 9.538322 | 3.85E-20 | 1.17E-18 | 34.83215 |
| HIST1H1D  | -0.69817 | 5.456494 | -9.53789 | 3.87E-20 | 1.17E-18 | 34.82859 |
| COL5A3    | 0.575692 | 6.670572 | 9.534859 | 3.96E-20 | 1.20E-18 | 34.80365 |
| LINC01140 | 0.703521 | 5.89585  | 9.52887  | 4.17E-20 | 1.25E-18 | 34.75439 |
| RASL12    | 0.577342 | 6.925513 | 9.495571 | 5.50E-20 | 1.65E-18 | 34.4809  |
| CA9       | -0.79804 | 6.25153  | -9.4898  | 5.77E-20 | 1.73E-18 | 34.43355 |
| LRRN3     | 0.826316 | 5.623979 | 9.487473 | 5.88E-20 | 1.76E-18 | 34.4145  |
| CST7      | 0.797008 | 6.924711 | 9.485807 | 5.96E-20 | 1.78E-18 | 34.40084 |
| TOMM40    | -0.66625 | 8.194154 | -9.47745 | 6.39E-20 | 1.89E-18 | 34.33239 |
| FMOD      | 0.873349 | 9.116237 | 9.466335 | 7.01E-20 | 2.07E-18 | 34.24137 |
| MRE11A    | -0.51128 | 5.313711 | -9.46192 | 7.27E-20 | 2.14E-18 | 34.20521 |
| PARP4     | 0.559858 | 9.022223 | 9.460089 | 7.38E-20 | 2.17E-18 | 34.19025 |
| ATP6V1B2  | 0.731801 | 9.206137 | 9.459141 | 7.44E-20 | 2.18E-18 | 34.1825  |
| GAB2      | 0.781076 | 7.653393 | 9.441333 | 8.63E-20 | 2.52E-18 | 34.03694 |
| MCTP1     | 0.605529 | 6.12783  | 9.440337 | 8.70E-20 | 2.53E-18 | 34.02881 |
| PPIC      | 0.768436 | 9.383702 | 9.434305 | 9.14E-20 | 2.66E-18 | 33.97955 |
| SH3GLB1   | 0.50576  | 9.548731 | 9.432372 | 9.29E-20 | 2.69E-18 | 33.96378 |
| SASH1     | 0.675852 | 8.946805 | 9.432076 | 9.31E-20 | 2.69E-18 | 33.96136 |
| GMDS      | -0.65926 | 7.086848 | -9.41849 | 1.04E-19 | 3.00E-18 | 33.85055 |
| FTL       | 0.505761 | 13.38318 | 9.414326 | 1.08E-19 | 3.10E-18 | 33.81658 |
| ENTPD1    | 0.771166 | 7.373242 | 9.409564 | 1.12E-19 | 3.21E-18 | 33.77777 |
| COL1A1    | 0.995176 | 9.754949 | 9.404444 | 1.17E-19 | 3.34E-18 | 33.73607 |
| VAX2      | -0.641   | 5.856026 | -9.4013  | 1.20E-19 | 3.42E-18 | 33.71046 |

|           |          |          |          |          |          |          |
|-----------|----------|----------|----------|----------|----------|----------|
| RAB31     | 0.70185  | 10.78412 | 9.398916 | 1.22E-19 | 3.48E-18 | 33.69105 |
| HJURP     | -0.84563 | 6.431521 | -9.39612 | 1.25E-19 | 3.56E-18 | 33.66829 |
| SULF1     | 0.788428 | 9.579208 | 9.392555 | 1.29E-19 | 3.65E-18 | 33.63928 |
| HHEX      | 0.730131 | 6.233091 | 9.38304  | 1.40E-19 | 3.94E-18 | 33.56188 |
| HOXA4     | 0.615307 | 5.482919 | 9.363761 | 1.64E-19 | 4.61E-18 | 33.40524 |
| FANCI     | -0.6316  | 6.826518 | -9.36186 | 1.66E-19 | 4.67E-18 | 33.38981 |
| CHST7     | 0.694011 | 5.478688 | 9.357383 | 1.73E-19 | 4.84E-18 | 33.35347 |
| GIMAP4    | 0.826056 | 7.738433 | 9.342046 | 1.96E-19 | 5.45E-18 | 33.2291  |
| RFWD3     | -0.64592 | 6.821099 | -9.32782 | 2.20E-19 | 6.11E-18 | 33.11386 |
| TAGLN     | 1.043248 | 10.04933 | 9.322099 | 2.31E-19 | 6.39E-18 | 33.06756 |
| RHO       | -0.50307 | 5.007898 | -9.3098  | 2.55E-19 | 7.05E-18 | 32.96806 |
| DOHH      | -0.5297  | 5.799729 | -9.2778  | 3.31E-19 | 9.14E-18 | 32.70971 |
| CORIN     | 0.773947 | 5.028762 | 9.267511 | 3.61E-19 | 9.92E-18 | 32.6268  |
| STEAP1    | 0.959158 | 7.874875 | 9.265803 | 3.66E-19 | 1.00E-17 | 32.61303 |
| DTL       | -0.92456 | 7.705663 | -9.25179 | 4.10E-19 | 1.12E-17 | 32.5002  |
| AGBL5     | -0.52953 | 6.537684 | -9.25068 | 4.14E-19 | 1.12E-17 | 32.49126 |
| TTC27     | -0.53012 | 7.501597 | -9.24242 | 4.43E-19 | 1.20E-17 | 32.42484 |
| SLC52A2   | -0.56698 | 8.263234 | -9.23588 | 4.67E-19 | 1.26E-17 | 32.37228 |
| HLA-DMB   | 0.627918 | 9.86216  | 9.229847 | 4.90E-19 | 1.32E-17 | 32.3238  |
| HSPG2     | 0.845653 | 7.461947 | 9.229264 | 4.93E-19 | 1.32E-17 | 32.31912 |
| CAMKMT    | -0.53036 | 5.315357 | -9.22784 | 4.98E-19 | 1.33E-17 | 32.3077  |
| RNF2      | -0.67186 | 6.337205 | -9.22677 | 5.03E-19 | 1.34E-17 | 32.29908 |
| PKD2L1    | 0.901565 | 5.938798 | 9.209688 | 5.78E-19 | 1.54E-17 | 32.16201 |
| SLC13A1   | -0.52478 | 2.73193  | -9.20683 | 5.91E-19 | 1.57E-17 | 32.13907 |
| HLA-DMA   | 0.761104 | 9.656969 | 9.205371 | 5.98E-19 | 1.58E-17 | 32.1274  |
| SHPK      | -0.57368 | 6.6524   | -9.19794 | 6.36E-19 | 1.67E-17 | 32.06784 |
| CACNA2D3  | 0.758823 | 4.613443 | 9.190402 | 6.76E-19 | 1.77E-17 | 32.00747 |
| CASQ2     | 0.734714 | 5.19712  | 9.186567 | 6.97E-19 | 1.83E-17 | 31.97677 |
| ELMO1     | 0.692415 | 6.61512  | 9.157145 | 8.85E-19 | 2.31E-17 | 31.74155 |
| OCA2      | -0.71522 | 5.309399 | -9.15698 | 8.86E-19 | 2.31E-17 | 31.74023 |
| MS4A4A    | 0.875407 | 7.178131 | 9.14863  | 9.48E-19 | 2.46E-17 | 31.67358 |
| DPEP1     | 0.737628 | 5.338106 | 9.141309 | 1.01E-18 | 2.60E-17 | 31.61518 |
| MMP14     | 1.020002 | 7.119677 | 9.140015 | 1.02E-18 | 2.62E-17 | 31.60486 |
| RGL1      | 0.594035 | 8.83498  | 9.139828 | 1.02E-18 | 2.62E-17 | 31.60337 |
| CD1D      | 0.758489 | 5.046299 | 9.124888 | 1.15E-18 | 2.95E-17 | 31.48431 |
| PHLDA2    | -0.55698 | 6.093824 | -9.11874 | 1.21E-18 | 3.09E-17 | 31.43539 |
| PNRC1     | 0.657077 | 9.82703  | 9.10885  | 1.31E-18 | 3.34E-17 | 31.35667 |
| TGFB2     | 0.831032 | 7.677086 | 9.103358 | 1.37E-18 | 3.48E-17 | 31.313   |
| TMEM212   | -0.87076 | 5.190617 | -9.086   | 1.57E-18 | 3.99E-17 | 31.17507 |
| ADH1B     | 1.138354 | 6.279849 | 9.085817 | 1.58E-18 | 3.99E-17 | 31.17365 |
| LINC00339 | 0.962782 | 6.370747 | 9.080747 | 1.64E-18 | 4.15E-17 | 31.13341 |
| UTP14A    | -0.61753 | 6.161933 | -9.07235 | 1.76E-18 | 4.43E-17 | 31.06681 |
| BYSL      | -0.67039 | 7.76461  | -9.06869 | 1.81E-18 | 4.56E-17 | 31.03778 |
| FBLN2     | 1.105469 | 8.116326 | 9.066811 | 1.84E-18 | 4.62E-17 | 31.02289 |

|          |          |          |          |          |          |          |
|----------|----------|----------|----------|----------|----------|----------|
| FSTL1    | 1.042937 | 9.677124 | 9.060798 | 1.93E-18 | 4.83E-17 | 30.97525 |
| MAFB     | 0.76927  | 10.35372 | 9.033987 | 2.39E-18 | 5.97E-17 | 30.76309 |
| P2RY13   | 0.7745   | 5.284071 | 9.029477 | 2.48E-18 | 6.18E-17 | 30.72745 |
| BTG2     | 0.858451 | 8.579707 | 9.025585 | 2.56E-18 | 6.36E-17 | 30.69669 |
| MKI67    | -0.73001 | 6.625438 | -9.01192 | 2.85E-18 | 7.08E-17 | 30.58884 |
| NSUN7    | -0.58536 | 4.766377 | -9.00467 | 3.02E-18 | 7.47E-17 | 30.53165 |
| WLS      | 0.776492 | 7.631269 | 9.003907 | 3.04E-18 | 7.50E-17 | 30.52562 |
| KLRB1    | 0.9424   | 6.156242 | 8.986826 | 3.49E-18 | 8.57E-17 | 30.39104 |
| CYP20A1  | 0.550358 | 6.581035 | 8.986386 | 3.50E-18 | 8.58E-17 | 30.38758 |
| CD52     | 0.968606 | 8.337885 | 8.975761 | 3.81E-18 | 9.32E-17 | 30.30397 |
| MICALL2  | -0.58072 | 6.52414  | -8.97519 | 3.83E-18 | 9.32E-17 | 30.29947 |
| METTL21B | 0.636923 | 6.79801  | 8.974096 | 3.86E-18 | 9.39E-17 | 30.29087 |
| DFNA5    | 0.776466 | 7.661663 | 8.970007 | 3.99E-18 | 9.68E-17 | 30.25872 |
| ENTPD6   | -0.60388 | 7.550862 | -8.96179 | 4.26E-18 | 1.03E-16 | 30.19417 |
| MS4A6A   | 0.774267 | 8.185482 | 8.945511 | 4.85E-18 | 1.17E-16 | 30.06633 |
| TCL1B    | 0.857915 | 5.072235 | 8.939369 | 5.09E-18 | 1.23E-16 | 30.01816 |
| GLIPR1   | 0.737302 | 8.068217 | 8.934245 | 5.30E-18 | 1.27E-16 | 29.97799 |
| RPL11    | 0.703465 | 12.70533 | 8.933372 | 5.34E-18 | 1.28E-16 | 29.97114 |
| ACSBG1   | -0.5373  | 4.200961 | -8.92144 | 5.87E-18 | 1.40E-16 | 29.87768 |
| MAP3K7CL | 0.641679 | 5.267278 | 8.915365 | 6.16E-18 | 1.47E-16 | 29.83012 |
| MYCT1    | 0.509982 | 5.498303 | 8.912765 | 6.29E-18 | 1.50E-16 | 29.80977 |
| NDNF     | 0.697653 | 5.708148 | 8.912256 | 6.32E-18 | 1.50E-16 | 29.80579 |
| NOX4     | 0.687418 | 6.224091 | 8.906956 | 6.59E-18 | 1.55E-16 | 29.76434 |
| UBE2C    | -1.01169 | 8.714105 | -8.89755 | 7.10E-18 | 1.67E-16 | 29.69081 |
| FLAD1    | -0.55606 | 8.101042 | -8.896   | 7.19E-18 | 1.69E-16 | 29.67867 |
| CENPM    | -0.86995 | 6.98163  | -8.88023 | 8.14E-18 | 1.91E-16 | 29.55558 |
| RBFA     | -0.6844  | 6.758619 | -8.87695 | 8.36E-18 | 1.95E-16 | 29.52998 |
| CENPN    | -0.66715 | 5.963166 | -8.87402 | 8.55E-18 | 2.00E-16 | 29.50714 |
| TACC3    | -0.83865 | 7.160687 | -8.86702 | 9.04E-18 | 2.10E-16 | 29.45258 |
| KDR      | 0.640205 | 7.152066 | 8.854937 | 9.95E-18 | 2.30E-16 | 29.35845 |
| CCL19    | 1.229813 | 8.532582 | 8.853575 | 1.01E-17 | 2.32E-16 | 29.34785 |
| PRC1     | -0.9566  | 8.082051 | -8.8514  | 1.02E-17 | 2.36E-16 | 29.33094 |
| CD34     | 0.882547 | 7.067892 | 8.843846 | 1.09E-17 | 2.48E-16 | 29.27215 |
| EPX      | -0.63416 | 4.895146 | -8.81286 | 1.39E-17 | 3.16E-16 | 29.03148 |
| KLRG1    | 0.846315 | 5.75025  | 8.800786 | 1.52E-17 | 3.45E-16 | 28.93786 |
| IRF8     | 0.721621 | 8.384907 | 8.799769 | 1.54E-17 | 3.47E-16 | 28.92997 |
| FHOD3    | 0.771737 | 5.594242 | 8.799519 | 1.54E-17 | 3.47E-16 | 28.92804 |
| TMPO     | -0.51816 | 6.890168 | -8.7987  | 1.55E-17 | 3.49E-16 | 28.9217  |
| LRMP     | 0.765883 | 6.067823 | 8.785342 | 1.72E-17 | 3.86E-16 | 28.81826 |
| LY96     | 0.966972 | 8.279378 | 8.785021 | 1.73E-17 | 3.86E-16 | 28.81578 |
| TUBG1    | -0.62465 | 8.760251 | -8.77492 | 1.87E-17 | 4.17E-16 | 28.73764 |
| PUS1     | -0.59905 | 6.971389 | -8.76921 | 1.95E-17 | 4.35E-16 | 28.69354 |
| ADAMTS5  | 0.718852 | 6.981438 | 8.767183 | 1.99E-17 | 4.40E-16 | 28.67785 |
| CEP55    | -1.00908 | 6.864638 | -8.76417 | 2.03E-17 | 4.50E-16 | 28.65461 |

|          |          |          |          |          |          |          |
|----------|----------|----------|----------|----------|----------|----------|
| PTGER4   | 0.61464  | 6.864432 | 8.759406 | 2.11E-17 | 4.66E-16 | 28.61779 |
| NRXN1    | -0.52079 | 3.952379 | -8.75713 | 2.15E-17 | 4.73E-16 | 28.60024 |
| CABYR    | -0.58332 | 6.271478 | -8.7549  | 2.19E-17 | 4.81E-16 | 28.58297 |
| STX5     | -0.53669 | 7.034342 | -8.75223 | 2.23E-17 | 4.89E-16 | 28.5624  |
| TRIM52   | 0.501439 | 6.725141 | 8.748447 | 2.30E-17 | 5.03E-16 | 28.53321 |
| CNN1     | 0.729073 | 7.308663 | 8.737957 | 2.50E-17 | 5.44E-16 | 28.45234 |
| HLA-DPA1 | 0.837367 | 10.78595 | 8.718534 | 2.91E-17 | 6.31E-16 | 28.30279 |
| NCKAP1L  | 0.586577 | 6.965537 | 8.717863 | 2.92E-17 | 6.33E-16 | 28.29762 |
| SPRY2    | 0.721455 | 7.438427 | 8.716181 | 2.96E-17 | 6.39E-16 | 28.28468 |
| ROR2     | 0.569636 | 5.94638  | 8.704635 | 3.24E-17 | 6.99E-16 | 28.19592 |
| MYBL2    | -0.96363 | 6.862662 | -8.70205 | 3.31E-17 | 7.12E-16 | 28.17607 |
| PTGDS    | 0.853488 | 8.212446 | 8.700376 | 3.35E-17 | 7.20E-16 | 28.1632  |
| MMRN1    | 0.753826 | 4.181627 | 8.693022 | 3.55E-17 | 7.61E-16 | 28.10674 |
| FAS      | 0.57982  | 7.085151 | 8.691993 | 3.58E-17 | 7.65E-16 | 28.09884 |
| LPL      | 1.035629 | 8.037258 | 8.690471 | 3.62E-17 | 7.73E-16 | 28.08716 |
| FCER1G   | 0.934006 | 8.672303 | 8.683645 | 3.82E-17 | 8.14E-16 | 28.03479 |
| PALLD    | 0.604319 | 9.244738 | 8.676324 | 4.04E-17 | 8.57E-16 | 27.97866 |
| BGN      | 0.975087 | 9.402597 | 8.670511 | 4.23E-17 | 8.95E-16 | 27.93412 |
| PCNT     | -0.54356 | 7.079861 | -8.66235 | 4.50E-17 | 9.52E-16 | 27.87162 |
| TMEM47   | 0.775174 | 8.545712 | 8.661435 | 4.54E-17 | 9.57E-16 | 27.86462 |
| EXOSC4   | -0.51711 | 8.490568 | -8.63108 | 5.74E-17 | 1.19E-15 | 27.6326  |
| RNF19B   | 0.962679 | 6.980945 | 8.629589 | 5.81E-17 | 1.20E-15 | 27.6212  |
| NACAD    | 0.633471 | 5.14487  | 8.628412 | 5.86E-17 | 1.21E-15 | 27.61222 |
| AMPH     | 0.871536 | 6.099361 | 8.625337 | 6.00E-17 | 1.24E-15 | 27.58876 |
| CHST8    | -0.60431 | 6.190901 | -8.62302 | 6.11E-17 | 1.26E-15 | 27.57109 |
| SQLE     | -0.71031 | 7.480879 | -8.62099 | 6.21E-17 | 1.28E-15 | 27.5556  |
| CELF2    | 0.541011 | 7.087281 | 8.596036 | 7.53E-17 | 1.54E-15 | 27.3655  |
| ASPA     | 0.610696 | 4.426918 | 8.590686 | 7.85E-17 | 1.60E-15 | 27.32479 |
| RPGRIP1L | -0.50581 | 5.0784   | -8.58723 | 8.06E-17 | 1.64E-15 | 27.29849 |
| VWF      | 0.663879 | 7.625358 | 8.584932 | 8.21E-17 | 1.66E-15 | 27.28104 |
| E2F8     | -0.82307 | 5.656533 | -8.58215 | 8.39E-17 | 1.70E-15 | 27.25987 |
| ZNF385D  | 0.703596 | 4.924102 | 8.580465 | 8.50E-17 | 1.72E-15 | 27.24709 |
| FEZ1     | 0.53525  | 5.540123 | 8.579684 | 8.55E-17 | 1.72E-15 | 27.24115 |
| AMPD1    | 0.706102 | 4.927151 | 8.576453 | 8.76E-17 | 1.77E-15 | 27.2166  |
| SLC18A2  | 0.612245 | 4.528115 | 8.569537 | 9.24E-17 | 1.85E-15 | 27.16409 |
| MACROD1  | -0.59161 | 6.700135 | -8.56175 | 9.81E-17 | 1.96E-15 | 27.105   |
| COL21A1  | 0.771821 | 5.508947 | 8.552387 | 1.05E-16 | 2.10E-15 | 27.034   |
| DNM1     | 0.554938 | 6.913509 | 8.538273 | 1.18E-16 | 2.34E-15 | 26.92708 |
| IFITM2   | 0.593846 | 11.84015 | 8.536673 | 1.19E-16 | 2.36E-15 | 26.91497 |
| MAN1A1   | 0.640316 | 8.108256 | 8.529057 | 1.26E-16 | 2.50E-15 | 26.85735 |
| GSPT2    | 0.774199 | 7.095324 | 8.526176 | 1.29E-16 | 2.54E-15 | 26.83556 |
| LYZ      | 1.03495  | 9.984262 | 8.523443 | 1.32E-16 | 2.59E-15 | 26.8149  |
| SPATA7   | 0.61956  | 6.078342 | 8.495221 | 1.64E-16 | 3.20E-15 | 26.60182 |
| PCDHA9   | -0.7265  | 4.965145 | -8.49205 | 1.68E-16 | 3.27E-15 | 26.57793 |

|           |          |          |          |          |          |          |
|-----------|----------|----------|----------|----------|----------|----------|
| MEGF6     | 0.622954 | 6.352749 | 8.486058 | 1.76E-16 | 3.41E-15 | 26.53277 |
| PLTP      | 0.792201 | 8.314298 | 8.480176 | 1.84E-16 | 3.55E-15 | 26.48846 |
| TBC1D19   | 0.746058 | 5.897793 | 8.474754 | 1.91E-16 | 3.70E-15 | 26.44764 |
| RGS2      | 0.796618 | 9.171032 | 8.473017 | 1.94E-16 | 3.74E-15 | 26.43457 |
| DONSON    | -0.55879 | 7.30872  | -8.46987 | 1.99E-16 | 3.82E-15 | 26.41093 |
| SLC7A5    | -0.98315 | 8.056425 | -8.46954 | 1.99E-16 | 3.82E-15 | 26.4084  |
| PEX13     | -0.53169 | 6.707525 | -8.4644  | 2.07E-16 | 3.96E-15 | 26.36979 |
| CBX8      | -0.51567 | 5.38906  | -8.45637 | 2.20E-16 | 4.21E-15 | 26.30939 |
| EIF5A2    | 0.539256 | 5.147811 | 8.454133 | 2.24E-16 | 4.27E-15 | 26.2926  |
| ZFHX4     | 0.833713 | 6.182335 | 8.452235 | 2.27E-16 | 4.33E-15 | 26.27834 |
| SLC6A15   | -0.56957 | 3.510738 | -8.44302 | 2.44E-16 | 4.63E-15 | 26.20916 |
| HOXA10    | 0.565584 | 6.158103 | 8.436464 | 2.56E-16 | 4.85E-15 | 26.15998 |
| ARL2BP    | 0.637112 | 8.41265  | 8.435722 | 2.58E-16 | 4.87E-15 | 26.15442 |
| SDPR      | 0.684568 | 5.260119 | 8.434932 | 2.60E-16 | 4.89E-15 | 26.1485  |
| CCNE2     | -0.74952 | 6.201526 | -8.43215 | 2.65E-16 | 4.99E-15 | 26.12761 |
| RALGDS    | 0.521485 | 8.09806  | 8.404282 | 3.28E-16 | 6.14E-15 | 25.919   |
| HBB       | 1.201654 | 8.256196 | 8.394234 | 3.54E-16 | 6.60E-15 | 25.8439  |
| DIO2      | 0.615229 | 6.2893   | 8.376578 | 4.04E-16 | 7.53E-15 | 25.71212 |
| NIPSNAP3B | 0.610989 | 4.77151  | 8.374778 | 4.10E-16 | 7.62E-15 | 25.69869 |
| LMOD1     | 0.561148 | 5.796608 | 8.370386 | 4.24E-16 | 7.85E-15 | 25.66595 |
| VENTX     | 0.677537 | 4.958308 | 8.36615  | 4.38E-16 | 8.10E-15 | 25.63439 |
| GPNMB     | 0.731707 | 10.4162  | 8.363806 | 4.46E-16 | 8.23E-15 | 25.61693 |
| MRGBP     | -0.50082 | 7.128459 | -8.35287 | 4.84E-16 | 8.91E-15 | 25.53553 |
| ZAP70     | 0.656451 | 5.468953 | 8.342239 | 5.25E-16 | 9.60E-15 | 25.45644 |
| UBE2E3    | 0.915593 | 9.610461 | 8.340394 | 5.32E-16 | 9.71E-15 | 25.44273 |
| EVC       | 0.562948 | 6.004135 | 8.340281 | 5.32E-16 | 9.71E-15 | 25.44189 |
| CPQ       | 0.543429 | 8.059871 | 8.335073 | 5.54E-16 | 1.01E-14 | 25.40319 |
| ZNF492    | -0.51366 | 4.662782 | -8.33458 | 5.56E-16 | 1.01E-14 | 25.39951 |
| LSP1      | 0.507141 | 7.633699 | 8.322155 | 6.10E-16 | 1.11E-14 | 25.30729 |
| ENO3      | -0.5486  | 4.744276 | -8.31755 | 6.32E-16 | 1.15E-14 | 25.27309 |
| TNFRSF17  | 1.341661 | 5.496112 | 8.314615 | 6.46E-16 | 1.17E-14 | 25.25136 |
| CCL21     | 0.928106 | 6.549081 | 8.29544  | 7.47E-16 | 1.35E-14 | 25.10932 |
| BLM       | -0.75036 | 6.51226  | -8.28766 | 7.92E-16 | 1.42E-14 | 25.05176 |
| FKBP14    | 0.532844 | 7.376224 | 8.282857 | 8.21E-16 | 1.47E-14 | 25.01626 |
| NR2F1     | 1.205367 | 7.769313 | 8.268564 | 9.14E-16 | 1.64E-14 | 24.91068 |
| BST1      | 0.597816 | 5.181573 | 8.253522 | 1.02E-15 | 1.83E-14 | 24.79972 |
| ADH1C     | 0.8249   | 4.829826 | 8.251959 | 1.03E-15 | 1.85E-14 | 24.7882  |
| TRPC1     | 0.508502 | 5.540311 | 8.248023 | 1.07E-15 | 1.90E-14 | 24.75919 |
| DNM3      | 0.555056 | 5.302516 | 8.247835 | 1.07E-15 | 1.90E-14 | 24.75781 |
| MEF2C     | 0.600429 | 7.701813 | 8.217648 | 1.34E-15 | 2.35E-14 | 24.53573 |
| LBH       | 0.550827 | 8.294635 | 8.217259 | 1.34E-15 | 2.35E-14 | 24.53287 |
| ATP6V0D1  | 0.523121 | 9.83224  | 8.216902 | 1.35E-15 | 2.36E-14 | 24.53026 |
| LAIR1     | 0.60669  | 6.728    | 8.216322 | 1.35E-15 | 2.36E-14 | 24.526   |
| TNNT3     | 0.507913 | 5.640217 | 8.213872 | 1.38E-15 | 2.40E-14 | 24.50801 |

|           |          |          |          |          |          |          |
|-----------|----------|----------|----------|----------|----------|----------|
| PPM1H     | -0.61919 | 6.483339 | -8.21011 | 1.42E-15 | 2.47E-14 | 24.48041 |
| NR3C2     | 0.763044 | 5.930011 | 8.194342 | 1.59E-15 | 2.75E-14 | 24.36473 |
| MLLT4-AS1 | -0.66319 | 5.109676 | -8.19396 | 1.60E-15 | 2.76E-14 | 24.36192 |
| TYROBP    | 0.667419 | 9.839423 | 8.18549  | 1.70E-15 | 2.92E-14 | 24.29988 |
| GPX7      | 0.654495 | 7.665777 | 8.181808 | 1.75E-15 | 2.99E-14 | 24.27291 |
| TRIM68    | 0.577132 | 6.987765 | 8.176184 | 1.82E-15 | 3.11E-14 | 24.23176 |
| TRIP13    | -0.85959 | 7.529861 | -8.174   | 1.85E-15 | 3.16E-14 | 24.21579 |
| CBX7      | 0.649678 | 7.819751 | 8.170823 | 1.90E-15 | 3.23E-14 | 24.19254 |
| SCEL      | -0.6125  | 3.141004 | -8.1585  | 2.08E-15 | 3.54E-14 | 24.10245 |
| CACNA2D1  | 0.59287  | 5.788157 | 8.153411 | 2.16E-15 | 3.66E-14 | 24.06533 |
| PIBF1     | 0.696633 | 7.015844 | 8.146668 | 2.27E-15 | 3.82E-14 | 24.01611 |
| FOS       | 1.320681 | 8.963375 | 8.142611 | 2.34E-15 | 3.93E-14 | 23.98652 |
| TMEM100   | 0.902096 | 5.504208 | 8.139383 | 2.40E-15 | 4.01E-14 | 23.96298 |
| ARHGAP11A | -0.55406 | 3.957129 | -8.13708 | 2.44E-15 | 4.07E-14 | 23.94618 |
| DPEP2     | 0.725366 | 4.878161 | 8.136638 | 2.45E-15 | 4.08E-14 | 23.94298 |
| NSUN5     | -0.51163 | 8.982583 | -8.1299  | 2.57E-15 | 4.29E-14 | 23.89385 |
| SKP2      | -0.67821 | 6.364343 | -8.12844 | 2.60E-15 | 4.32E-14 | 23.88323 |
| EXO1      | -0.72848 | 6.169339 | -8.12187 | 2.73E-15 | 4.53E-14 | 23.83539 |
| RAMP2     | 0.571739 | 6.169354 | 8.121528 | 2.74E-15 | 4.53E-14 | 23.83293 |
| PRPH2     | 0.607481 | 4.954299 | 8.114681 | 2.88E-15 | 4.76E-14 | 23.78312 |
| PTGER2    | 0.591907 | 5.574407 | 8.111946 | 2.94E-15 | 4.85E-14 | 23.76323 |
| GGT5      | 0.795927 | 6.49785  | 8.111717 | 2.94E-15 | 4.85E-14 | 23.76157 |
| ZNF257    | -0.65847 | 4.096618 | -8.11006 | 2.98E-15 | 4.90E-14 | 23.74948 |
| BRCA2     | -0.5389  | 4.832082 | -8.10208 | 3.16E-15 | 5.19E-14 | 23.69153 |
| SLC1A2    | -0.70689 | 4.95263  | -8.10174 | 3.17E-15 | 5.20E-14 | 23.68908 |
| SCN3A     | 0.664117 | 3.768562 | 8.099837 | 3.21E-15 | 5.27E-14 | 23.67524 |
| CDO1      | 0.607348 | 5.816412 | 8.093545 | 3.36E-15 | 5.49E-14 | 23.62956 |
| RIPPLY3   | -0.66045 | 5.091476 | -8.09293 | 3.38E-15 | 5.51E-14 | 23.62508 |
| MORF4L1   | 0.520544 | 10.77914 | 8.089175 | 3.48E-15 | 5.65E-14 | 23.59785 |
| PAM       | 0.56888  | 9.523978 | 8.087114 | 3.53E-15 | 5.73E-14 | 23.5829  |
| GAS1      | 0.668948 | 7.054859 | 8.079661 | 3.73E-15 | 6.04E-14 | 23.52887 |
| UBXN8     | 0.682266 | 7.010497 | 8.077693 | 3.78E-15 | 6.12E-14 | 23.5146  |
| LILRP2    | -0.54393 | 3.995121 | -8.06754 | 4.08E-15 | 6.56E-14 | 23.4411  |
| CD86      | 0.594357 | 6.603567 | 8.059172 | 4.34E-15 | 6.96E-14 | 23.38052 |
| POLR2F    | -0.53948 | 7.791275 | -8.05781 | 4.38E-15 | 7.03E-14 | 23.37064 |
| TSHZ2     | 0.750109 | 6.023682 | 8.04904  | 4.67E-15 | 7.46E-14 | 23.30728 |
| CLEC10A   | 0.587563 | 6.273214 | 8.047123 | 4.74E-15 | 7.56E-14 | 23.29343 |
| XYLT2     | -0.64945 | 5.808582 | -8.04366 | 4.86E-15 | 7.74E-14 | 23.26844 |
| RCN3      | 0.526315 | 7.785535 | 8.034684 | 5.19E-15 | 8.25E-14 | 23.20362 |
| STMN1     | -0.67655 | 6.933164 | -8.03073 | 5.34E-15 | 8.48E-14 | 23.17509 |
| HSPB2     | 0.678774 | 6.010603 | 8.028832 | 5.42E-15 | 8.59E-14 | 23.16141 |
| ADIPOQ    | 1.303711 | 7.559839 | 8.026633 | 5.51E-15 | 8.72E-14 | 23.14555 |
| SLC6A3    | 0.654015 | 5.519355 | 8.021558 | 5.72E-15 | 9.00E-14 | 23.10897 |
| PDE6C     | -0.50104 | 2.514542 | -8.00865 | 6.28E-15 | 9.86E-14 | 23.01605 |

|          |          |          |          |          |          |          |
|----------|----------|----------|----------|----------|----------|----------|
| GIN51    | -0.84642 | 7.883781 | -7.99819 | 6.78E-15 | 1.06E-13 | 22.94078 |
| RACGAP1  | -0.71769 | 8.576111 | -7.99785 | 6.80E-15 | 1.06E-13 | 22.93833 |
| SLC16A2  | 0.734789 | 6.548901 | 7.991255 | 7.14E-15 | 1.11E-13 | 22.89094 |
| ARSE     | 0.626919 | 5.285032 | 7.972038 | 8.21E-15 | 1.27E-13 | 22.75302 |
| HLF      | 0.787551 | 5.640693 | 7.96274  | 8.79E-15 | 1.35E-13 | 22.68638 |
| RGS4     | 0.639246 | 6.11418  | 7.960504 | 8.93E-15 | 1.37E-13 | 22.67037 |
| DHX38    | 0.6313   | 6.460043 | 7.958638 | 9.06E-15 | 1.38E-13 | 22.657   |
| PPP1R16B | 0.664522 | 6.289627 | 7.956582 | 9.19E-15 | 1.40E-13 | 22.64228 |
| POU4F1   | -0.53589 | 3.883778 | -7.95367 | 9.39E-15 | 1.43E-13 | 22.62143 |
| LAPTM5   | 0.652824 | 10.47466 | 7.952831 | 9.45E-15 | 1.44E-13 | 22.61544 |
| PLXDC1   | 0.625992 | 7.306539 | 7.946222 | 9.91E-15 | 1.51E-13 | 22.56816 |
| GNL2     | -0.60649 | 8.774058 | -7.94532 | 9.98E-15 | 1.52E-13 | 22.5617  |
| SLA      | 0.661986 | 7.710599 | 7.936756 | 1.06E-14 | 1.61E-13 | 22.50049 |
| FXYD2    | -0.57024 | 5.250388 | -7.92347 | 1.17E-14 | 1.77E-13 | 22.40566 |
| CLIP3    | 0.571001 | 6.153244 | 7.921051 | 1.19E-14 | 1.79E-13 | 22.38837 |
| APOBR    | 0.635431 | 5.246877 | 7.910821 | 1.28E-14 | 1.93E-13 | 22.31543 |
| HOXA7    | 0.621419 | 5.961415 | 7.909682 | 1.29E-14 | 1.94E-13 | 22.30732 |
| TPX2     | -0.91505 | 7.774257 | -7.90696 | 1.32E-14 | 1.98E-13 | 22.28792 |
| SYNDIG1  | 0.668558 | 6.467391 | 7.905601 | 1.33E-14 | 1.99E-13 | 22.27825 |
| DBNDD1   | -0.55053 | 6.336761 | -7.89902 | 1.40E-14 | 2.09E-13 | 22.23136 |
| KIF20A   | -0.81007 | 7.077959 | -7.89695 | 1.42E-14 | 2.12E-13 | 22.21669 |
| ASGR1    | 0.568335 | 4.145909 | 7.894736 | 1.44E-14 | 2.15E-13 | 22.20091 |
| KIF4A    | -0.8285  | 6.661959 | -7.87458 | 1.67E-14 | 2.47E-13 | 22.0577  |
| WFDC1    | 0.636187 | 6.059167 | 7.872715 | 1.69E-14 | 2.50E-13 | 22.04442 |
| VSIG4    | 0.609508 | 7.911736 | 7.869863 | 1.73E-14 | 2.55E-13 | 22.02419 |
| CMA1     | 0.59749  | 4.401736 | 7.868515 | 1.74E-14 | 2.57E-13 | 22.01462 |
| SCN3B    | 0.500805 | 4.228125 | 7.864316 | 1.80E-14 | 2.65E-13 | 21.98483 |
| BTN3A2   | 0.673033 | 7.966241 | 7.863963 | 1.80E-14 | 2.65E-13 | 21.98233 |
| GHR      | 0.827667 | 7.198492 | 7.858908 | 1.87E-14 | 2.74E-13 | 21.94649 |
| ZNF165   | -0.66724 | 6.136309 | -7.85661 | 1.90E-14 | 2.78E-13 | 21.93017 |
| BTK      | 0.502844 | 6.195699 | 7.850857 | 1.98E-14 | 2.90E-13 | 21.88945 |
| HRC      | 0.501059 | 4.371963 | 7.843209 | 2.09E-14 | 3.05E-13 | 21.83531 |
| GP9      | 0.558505 | 5.434802 | 7.831417 | 2.28E-14 | 3.31E-13 | 21.75191 |
| TAS2R10  | -0.59502 | 4.147835 | -7.83118 | 2.28E-14 | 3.31E-13 | 21.75021 |
| CDT1     | -0.65254 | 5.941431 | -7.82764 | 2.34E-14 | 3.39E-13 | 21.72522 |
| RAI2     | 0.824279 | 7.395231 | 7.825882 | 2.37E-14 | 3.42E-13 | 21.7128  |
| ROR1     | 0.605176 | 5.709526 | 7.820028 | 2.47E-14 | 3.56E-13 | 21.67146 |
| SYNC     | 0.641132 | 6.676564 | 7.818646 | 2.50E-14 | 3.59E-13 | 21.6617  |
| PDGFC    | 0.867773 | 8.583978 | 7.817145 | 2.52E-14 | 3.62E-13 | 21.65111 |
| DLGAP5   | -0.98314 | 6.69812  | -7.81708 | 2.52E-14 | 3.62E-13 | 21.65062 |
| USP13    | -0.51058 | 7.922306 | -7.81528 | 2.56E-14 | 3.66E-13 | 21.63795 |
| FCER1A   | 0.662489 | 5.566079 | 7.811189 | 2.63E-14 | 3.77E-13 | 21.60909 |
| CX3CR1   | 0.898111 | 7.134675 | 7.806768 | 2.72E-14 | 3.88E-13 | 21.57791 |
| F8       | 0.564289 | 7.296213 | 7.803472 | 2.78E-14 | 3.96E-13 | 21.55468 |

|         |          |          |          |          |          |          |
|---------|----------|----------|----------|----------|----------|----------|
| PSRC1   | -0.55569 | 7.089467 | -7.79633 | 2.93E-14 | 4.16E-13 | 21.50434 |
| SH2D2A  | 0.720005 | 5.839148 | 7.794399 | 2.97E-14 | 4.22E-13 | 21.49076 |
| CCNB1   | -0.86523 | 8.021495 | -7.78469 | 3.18E-14 | 4.50E-13 | 21.42247 |
| UAP1L1  | 0.512579 | 5.989301 | 7.779423 | 3.31E-14 | 4.65E-13 | 21.3854  |
| RHBDF2  | -0.63625 | 7.488593 | -7.77771 | 3.35E-14 | 4.69E-13 | 21.37333 |
| CLCA3P  | -0.54367 | 2.694251 | -7.77424 | 3.43E-14 | 4.80E-13 | 21.349   |
| F11     | -0.55975 | 3.926344 | -7.77119 | 3.51E-14 | 4.90E-13 | 21.32758 |
| AURKB   | -0.69577 | 5.780999 | -7.7695  | 3.55E-14 | 4.95E-13 | 21.31566 |
| TBKBP1  | 0.507763 | 5.243028 | 7.766897 | 3.62E-14 | 5.03E-13 | 21.2974  |
| RGS5    | 0.766327 | 8.229895 | 7.75969  | 3.81E-14 | 5.27E-13 | 21.24682 |
| SCNN1G  | -0.56436 | 4.583763 | -7.75887 | 3.83E-14 | 5.29E-13 | 21.2411  |
| SKI     | 0.831004 | 7.700522 | 7.754323 | 3.96E-14 | 5.46E-13 | 21.20918 |
| FOXM1   | -0.92904 | 6.603657 | -7.75361 | 3.98E-14 | 5.48E-13 | 21.20417 |
| WDR3    | -0.65262 | 7.051598 | -7.75289 | 4.00E-14 | 5.50E-13 | 21.19916 |
| FCGR2B  | 1.045614 | 7.527058 | 7.750716 | 4.06E-14 | 5.58E-13 | 21.1839  |
| SPC25   | -0.81933 | 5.353598 | -7.74476 | 4.24E-14 | 5.80E-13 | 21.14219 |
| LILRB5  | 0.5774   | 4.870514 | 7.738065 | 4.44E-14 | 6.08E-13 | 21.09529 |
| CASP1   | 0.72205  | 7.551502 | 7.736004 | 4.51E-14 | 6.15E-13 | 21.08086 |
| SGCE    | 0.712433 | 8.851416 | 7.734031 | 4.57E-14 | 6.23E-13 | 21.06706 |
| PES1    | -0.53154 | 6.875976 | -7.72456 | 4.89E-14 | 6.66E-13 | 21.00085 |
| CDCA3   | -0.8111  | 6.890489 | -7.72328 | 4.94E-14 | 6.71E-13 | 20.99187 |
| LHX5    | 0.694391 | 4.529946 | 7.722766 | 4.96E-14 | 6.73E-13 | 20.98829 |
| CYP3A5  | -0.51722 | 3.934575 | -7.71344 | 5.30E-14 | 7.17E-13 | 20.92315 |
| CRY2    | 0.512822 | 7.156456 | 7.712515 | 5.33E-14 | 7.21E-13 | 20.91669 |
| WASF3   | 0.565494 | 7.072629 | 7.709061 | 5.46E-14 | 7.37E-13 | 20.89258 |
| ST20    | -0.55539 | 6.428075 | -7.70693 | 5.55E-14 | 7.47E-13 | 20.87768 |
| LRRC15  | 0.924977 | 8.05777  | 7.695799 | 6.01E-14 | 8.07E-13 | 20.8001  |
| ZNF407  | -0.51187 | 4.526176 | -7.68935 | 6.29E-14 | 8.43E-13 | 20.75515 |
| TACC2   | -0.56179 | 6.714367 | -7.68901 | 6.30E-14 | 8.44E-13 | 20.75279 |
| MYNN    | -0.51399 | 6.469537 | -7.68614 | 6.43E-14 | 8.60E-13 | 20.73279 |
| PECAM1  | 0.638305 | 8.388427 | 7.680852 | 6.68E-14 | 8.92E-13 | 20.69603 |
| DCTN6   | 0.652183 | 9.172987 | 7.658497 | 7.82E-14 | 1.04E-12 | 20.54068 |
| PPP1R9A | -0.53284 | 6.410426 | -7.65081 | 8.26E-14 | 1.09E-12 | 20.48737 |
| ATAD2   | -0.69447 | 7.595338 | -7.64314 | 8.72E-14 | 1.15E-12 | 20.43415 |
| INHBB   | 0.678262 | 8.200253 | 7.641019 | 8.85E-14 | 1.16E-12 | 20.41948 |
| CHML    | -0.56199 | 5.175484 | -7.64072 | 8.87E-14 | 1.17E-12 | 20.41742 |
| SLC6A7  | 0.661529 | 4.508266 | 7.634326 | 9.28E-14 | 1.22E-12 | 20.37313 |
| PLA2G2A | 0.904945 | 7.056723 | 7.633789 | 9.32E-14 | 1.22E-12 | 20.36941 |
| PLAGL1  | 0.688886 | 7.890638 | 7.631498 | 9.47E-14 | 1.24E-12 | 20.35355 |
| HMOX1   | 0.604389 | 8.143358 | 7.624709 | 9.93E-14 | 1.30E-12 | 20.30658 |
| RAD54B  | -0.60599 | 6.454126 | -7.62209 | 1.01E-13 | 1.32E-12 | 20.28849 |
| CCNA2   | -0.65558 | 6.651419 | -7.61109 | 1.09E-13 | 1.42E-12 | 20.21247 |
| VWA5A   | 0.502117 | 7.734012 | 7.605155 | 1.14E-13 | 1.48E-12 | 20.1715  |
| C7      | 0.827078 | 6.008439 | 7.590552 | 1.26E-13 | 1.63E-12 | 20.07079 |

|          |          |          |          |          |          |          |
|----------|----------|----------|----------|----------|----------|----------|
| ENC1     | 0.675165 | 8.402284 | 7.589646 | 1.27E-13 | 1.64E-12 | 20.06455 |
| PKM      | -0.64022 | 8.707348 | -7.58553 | 1.31E-13 | 1.68E-12 | 20.03618 |
| KIF11    | -0.74117 | 6.774715 | -7.58006 | 1.36E-13 | 1.74E-12 | 19.99856 |
| RAB23    | 0.562401 | 7.046635 | 7.577814 | 1.38E-13 | 1.77E-12 | 19.98308 |
| CAD      | -0.56988 | 6.940557 | -7.57659 | 1.39E-13 | 1.78E-12 | 19.97463 |
| BFSP1    | -0.66101 | 5.298924 | -7.57408 | 1.42E-13 | 1.81E-12 | 19.9574  |
| IL18R1   | 0.543442 | 4.944204 | 7.571671 | 1.44E-13 | 1.84E-12 | 19.94083 |
| NCF4     | 0.542936 | 6.251626 | 7.563317 | 1.53E-13 | 1.94E-12 | 19.88341 |
| PSTPIP1  | 0.609135 | 5.593223 | 7.562191 | 1.54E-13 | 1.95E-12 | 19.87568 |
| SEC22B   | -0.55344 | 10.03751 | -7.55973 | 1.57E-13 | 1.98E-12 | 19.85875 |
| FAM189B  | -0.59633 | 7.247192 | -7.55872 | 1.58E-13 | 2.00E-12 | 19.85183 |
| RNASE3   | 0.610582 | 5.010927 | 7.551057 | 1.67E-13 | 2.10E-12 | 19.79924 |
| AVL9     | -0.50364 | 6.038921 | -7.54437 | 1.75E-13 | 2.19E-12 | 19.75339 |
| IL7R     | 0.83705  | 8.160879 | 7.53753  | 1.83E-13 | 2.29E-12 | 19.7065  |
| LTN1     | -0.56746 | 7.2901   | -7.53707 | 1.84E-13 | 2.30E-12 | 19.70338 |
| HIST1H4D | -0.6157  | 5.039844 | -7.52826 | 1.95E-13 | 2.43E-12 | 19.64301 |
| CRTAM    | 0.738158 | 5.055819 | 7.523573 | 2.02E-13 | 2.51E-12 | 19.61095 |
| KIAA1614 | 0.627605 | 4.800731 | 7.522583 | 2.03E-13 | 2.52E-12 | 19.60418 |
| MCM10    | -0.83775 | 5.848219 | -7.52155 | 2.05E-13 | 2.54E-12 | 19.59709 |
| ITK      | 0.747145 | 6.159723 | 7.520889 | 2.06E-13 | 2.55E-12 | 19.5926  |
| CD69     | 0.821721 | 6.448771 | 7.517438 | 2.11E-13 | 2.61E-12 | 19.569   |
| GALNT10  | 0.52033  | 7.858462 | 7.515489 | 2.14E-13 | 2.64E-12 | 19.55568 |
| LMAN1L   | 0.599719 | 4.805702 | 7.512341 | 2.18E-13 | 2.69E-12 | 19.53417 |
| EHD2     | 0.712522 | 7.263656 | 7.51122  | 2.20E-13 | 2.71E-12 | 19.52651 |
| DOK5     | 0.599891 | 6.567033 | 7.507649 | 2.26E-13 | 2.77E-12 | 19.50212 |
| CCDC53   | 0.513315 | 8.65152  | 7.505964 | 2.28E-13 | 2.80E-12 | 19.49062 |
| EMP3     | 0.599242 | 8.489506 | 7.49929  | 2.39E-13 | 2.93E-12 | 19.44507 |
| MMP11    | 0.814556 | 7.746107 | 7.49553  | 2.45E-13 | 3.00E-12 | 19.41943 |
| ZFP37    | 0.528757 | 5.144066 | 7.49248  | 2.51E-13 | 3.06E-12 | 19.39863 |
| HDAC2    | -0.5405  | 8.534964 | -7.49168 | 2.52E-13 | 3.08E-12 | 19.39319 |
| TIMP2    | 0.822752 | 9.574348 | 7.490506 | 2.54E-13 | 3.10E-12 | 19.38517 |
| PBX3     | 0.517245 | 8.318048 | 7.478064 | 2.77E-13 | 3.36E-12 | 19.30043 |
| EDNRB    | 0.573485 | 6.201976 | 7.473726 | 2.86E-13 | 3.46E-12 | 19.27091 |
| LRRC8B   | -0.54673 | 6.221569 | -7.4709  | 2.91E-13 | 3.52E-12 | 19.2517  |
| KIFC1    | -0.63273 | 6.850021 | -7.46371 | 3.06E-13 | 3.69E-12 | 19.20282 |
| BIN2     | 0.75907  | 6.142946 | 7.460673 | 3.13E-13 | 3.77E-12 | 19.18217 |
| HEATR1   | -0.53321 | 7.710914 | -7.45515 | 3.25E-13 | 3.91E-12 | 19.14466 |
| NRGN     | 0.554897 | 5.221719 | 7.453165 | 3.29E-13 | 3.96E-12 | 19.13119 |
| HN1      | -0.613   | 9.263203 | -7.44721 | 3.43E-13 | 4.10E-12 | 19.09076 |
| SPRR2B   | -0.6601  | 4.923511 | -7.44068 | 3.59E-13 | 4.28E-12 | 19.04652 |
| RIMS2    | -0.52326 | 4.730266 | -7.42746 | 3.93E-13 | 4.67E-12 | 18.95693 |
| RAG2     | -0.58448 | 2.866093 | -7.41955 | 4.15E-13 | 4.90E-12 | 18.90346 |
| RBM15    | -0.50666 | 7.691926 | -7.4063  | 4.55E-13 | 5.35E-12 | 18.81389 |
| CWH43    | -0.62638 | 4.025961 | -7.40512 | 4.59E-13 | 5.39E-12 | 18.80593 |

|          |          |          |          |          |          |          |
|----------|----------|----------|----------|----------|----------|----------|
| SLC2A1   | -0.79125 | 6.4851   | -7.39981 | 4.76E-13 | 5.57E-12 | 18.7701  |
| MNDA     | 0.79304  | 7.561543 | 7.395182 | 4.91E-13 | 5.73E-12 | 18.73889 |
| PPP3R1   | 0.660412 | 6.98768  | 7.395084 | 4.92E-13 | 5.73E-12 | 18.73823 |
| P2RY14   | 0.543572 | 6.840744 | 7.395074 | 4.92E-13 | 5.73E-12 | 18.73816 |
| ANGPT4   | 0.556691 | 4.322461 | 7.390443 | 5.08E-13 | 5.91E-12 | 18.70694 |
| WNT2     | 0.739889 | 7.032118 | 7.383813 | 5.31E-13 | 6.15E-12 | 18.66227 |
| PTPRM    | 0.598195 | 8.135702 | 7.381329 | 5.41E-13 | 6.25E-12 | 18.64554 |
| ATP2C2   | -0.51958 | 6.26424  | -7.37966 | 5.47E-13 | 6.31E-12 | 18.63432 |
| BRIP1    | -0.67523 | 4.934987 | -7.37899 | 5.49E-13 | 6.33E-12 | 18.62982 |
| APOD     | 1.244367 | 10.17163 | 7.378098 | 5.53E-13 | 6.37E-12 | 18.62379 |
| ARMCX2   | 0.952129 | 8.557872 | 7.37635  | 5.59E-13 | 6.43E-12 | 18.61203 |
| ERMAP    | 0.530363 | 5.857779 | 7.372497 | 5.74E-13 | 6.59E-12 | 18.5861  |
| SNRNP40  | 0.58288  | 7.8203   | 7.360928 | 6.22E-13 | 7.12E-12 | 18.50833 |
| STMN2    | 0.631945 | 5.190789 | 7.358071 | 6.34E-13 | 7.24E-12 | 18.48914 |
| HMGB3    | -0.64964 | 8.052382 | -7.34404 | 6.98E-13 | 7.95E-12 | 18.39499 |
| AGPAT4   | 0.502261 | 5.380052 | 7.339596 | 7.20E-13 | 8.18E-12 | 18.3652  |
| CRYBB2   | 0.58863  | 4.675174 | 7.332033 | 7.58E-13 | 8.59E-12 | 18.31453 |
| SLC16A4  | 0.724404 | 6.572958 | 7.319349 | 8.26E-13 | 9.34E-12 | 18.22966 |
| GALR3    | 0.727527 | 5.546484 | 7.301053 | 9.36E-13 | 1.06E-11 | 18.10745 |
| CCDC121  | -0.56067 | 4.94505  | -7.28827 | 1.02E-12 | 1.14E-11 | 18.02224 |
| PGLYRP1  | 0.614888 | 4.475489 | 7.285087 | 1.04E-12 | 1.17E-11 | 18.00102 |
| SH3BGRL  | 0.542468 | 10.87295 | 7.280356 | 1.08E-12 | 1.20E-11 | 17.96951 |
| ZNF80    | -0.59672 | 3.072548 | -7.27979 | 1.08E-12 | 1.21E-11 | 17.96577 |
| NTHL1    | -0.50866 | 7.374749 | -7.27178 | 1.14E-12 | 1.27E-11 | 17.91245 |
| CCNB2    | -0.82347 | 6.584169 | -7.26291 | 1.21E-12 | 1.34E-11 | 17.85349 |
| HSPA14   | -0.53229 | 7.891527 | -7.26113 | 1.23E-12 | 1.35E-11 | 17.84168 |
| RUNDC3B  | 0.620645 | 5.31115  | 7.261039 | 1.23E-12 | 1.35E-11 | 17.84107 |
| LILRB2   | 0.554647 | 5.857635 | 7.255374 | 1.28E-12 | 1.40E-11 | 17.80345 |
| FXVD6    | 0.546309 | 7.981342 | 7.250386 | 1.32E-12 | 1.45E-11 | 17.77035 |
| RAD21L1  | -0.50433 | 2.94263  | -7.22048 | 1.62E-12 | 1.75E-11 | 17.57227 |
| GADD45A  | 0.756855 | 8.442485 | 7.219433 | 1.63E-12 | 1.77E-11 | 17.56538 |
| IGK      | 1.068615 | 6.551243 | 7.214039 | 1.69E-12 | 1.83E-11 | 17.52973 |
| SULT2B1  | -0.50149 | 6.322281 | -7.20708 | 1.77E-12 | 1.92E-11 | 17.48381 |
| CYP1B1   | 0.654257 | 8.108801 | 7.206766 | 1.77E-12 | 1.92E-11 | 17.48171 |
| IKBK     | 0.576873 | 7.24336  | 7.201332 | 1.84E-12 | 1.98E-11 | 17.44585 |
| RHBG     | 0.685916 | 5.488747 | 7.198813 | 1.87E-12 | 2.01E-11 | 17.42924 |
| GPR162   | 0.523877 | 4.785444 | 7.197894 | 1.88E-12 | 2.02E-11 | 17.42318 |
| SLC43A1  | 0.511444 | 6.876184 | 7.195918 | 1.91E-12 | 2.04E-11 | 17.41015 |
| SERPINE1 | 0.762897 | 6.692391 | 7.193944 | 1.93E-12 | 2.07E-11 | 17.39714 |
| CXCL14   | 1.114981 | 9.465915 | 7.19287  | 1.95E-12 | 2.08E-11 | 17.39006 |
| PLEKHB1  | -0.59382 | 5.682583 | -7.18807 | 2.01E-12 | 2.15E-11 | 17.35843 |
| PAF1     | -0.54589 | 8.049607 | -7.18632 | 2.04E-12 | 2.17E-11 | 17.34692 |
| HCLS1    | 0.66227  | 8.454018 | 7.180212 | 2.12E-12 | 2.26E-11 | 17.30671 |
| LGMN     | 0.631312 | 9.833427 | 7.174868 | 2.20E-12 | 2.33E-11 | 17.27155 |

|              |          |          |          |          |          |          |
|--------------|----------|----------|----------|----------|----------|----------|
| COL17A1      | 0.764991 | 4.695175 | 7.17033  | 2.27E-12 | 2.40E-11 | 17.24172 |
| GRIP2        | 0.547132 | 5.306483 | 7.16013  | 2.43E-12 | 2.56E-11 | 17.17472 |
| LRRC17       | 0.885579 | 6.493014 | 7.147767 | 2.64E-12 | 2.77E-11 | 17.09361 |
| COASY        | -0.54442 | 8.618348 | -7.11737 | 3.23E-12 | 3.35E-11 | 16.89468 |
| CLEC2B       | 0.864186 | 7.969741 | 7.111361 | 3.36E-12 | 3.48E-11 | 16.85547 |
| SLC9A3R1     | -0.67222 | 9.779794 | -7.10775 | 3.45E-12 | 3.55E-11 | 16.83193 |
| LOC101927770 | -0.66111 | 4.865809 | -7.09609 | 3.72E-12 | 3.83E-11 | 16.75592 |
| NDN          | 0.820212 | 7.496508 | 7.094894 | 3.75E-12 | 3.86E-11 | 16.74809 |
| CD247        | 0.651091 | 6.361144 | 7.092164 | 3.82E-12 | 3.93E-11 | 16.73031 |
| KCNK5        | -0.60412 | 6.317028 | -7.0876  | 3.94E-12 | 4.04E-11 | 16.70062 |
| RPE65        | -0.50234 | 3.012924 | -7.0818  | 4.10E-12 | 4.18E-11 | 16.66284 |
| TMC7         | -0.64501 | 4.365125 | -7.07667 | 4.24E-12 | 4.32E-11 | 16.62948 |
| OXT          | 0.553293 | 4.821334 | 7.075752 | 4.26E-12 | 4.34E-11 | 16.62353 |
| CD40LG       | 0.615724 | 4.645338 | 7.073728 | 4.32E-12 | 4.39E-11 | 16.61038 |
| MGLL         | 0.557284 | 8.729573 | 7.072077 | 4.37E-12 | 4.42E-11 | 16.59965 |
| ZNF562       | -0.57796 | 6.895565 | -7.06683 | 4.52E-12 | 4.57E-11 | 16.56558 |
| F2RL2        | 0.80292  | 6.09145  | 7.056814 | 4.83E-12 | 4.87E-11 | 16.50058 |
| IGLL1        | 0.510831 | 5.326669 | 7.056602 | 4.84E-12 | 4.87E-11 | 16.4992  |
| DEPDC1       | -0.73545 | 5.518359 | -7.05036 | 5.05E-12 | 5.06E-11 | 16.45877 |
| ACKR4        | 0.62863  | 5.118814 | 7.039983 | 5.40E-12 | 5.41E-11 | 16.39154 |
| FKBP10       | 0.874442 | 6.690516 | 7.039654 | 5.42E-12 | 5.42E-11 | 16.38941 |
| PPARG        | 0.594168 | 6.153681 | 7.038798 | 5.45E-12 | 5.44E-11 | 16.38387 |
| CNTN1        | 0.555321 | 5.359451 | 7.029703 | 5.78E-12 | 5.77E-11 | 16.32505 |
| ROBO1        | 0.594675 | 8.706054 | 7.020215 | 6.16E-12 | 6.14E-11 | 16.26375 |
| PRPH         | 0.661477 | 5.562284 | 7.019728 | 6.18E-12 | 6.15E-11 | 16.26061 |
| BCL9         | 0.635936 | 7.102083 | 7.011985 | 6.50E-12 | 6.45E-11 | 16.21064 |
| AGRP         | 0.581134 | 5.268537 | 7.006377 | 6.75E-12 | 6.68E-11 | 16.17448 |
| APLNR        | 0.607638 | 7.387976 | 7.003496 | 6.88E-12 | 6.80E-11 | 16.15591 |
| NUAK1        | 0.641435 | 8.703251 | 7.001288 | 6.98E-12 | 6.90E-11 | 16.14168 |
| ATP7B        | 0.739638 | 6.209256 | 6.998084 | 7.13E-12 | 7.04E-11 | 16.12105 |
| CD2          | 0.752154 | 7.877363 | 6.997095 | 7.17E-12 | 7.07E-11 | 16.11468 |
| MFHAS1       | 0.504266 | 7.388941 | 6.98423  | 7.81E-12 | 7.66E-11 | 16.03191 |
| G0S2         | 0.721605 | 8.277674 | 6.976629 | 8.21E-12 | 8.04E-11 | 15.98306 |
| SPDYE2       | -0.56162 | 6.844103 | -6.97647 | 8.21E-12 | 8.04E-11 | 15.98207 |
| ZWINT        | -0.73318 | 8.91854  | -6.96955 | 8.60E-12 | 8.40E-11 | 15.9376  |
| IL25         | 0.527212 | 4.556254 | 6.966469 | 8.77E-12 | 8.56E-11 | 15.91785 |
| SHARPIN      | -0.51284 | 7.821014 | -6.96601 | 8.80E-12 | 8.57E-11 | 15.9149  |
| KIF15        | -0.73868 | 5.765888 | -6.96036 | 9.13E-12 | 8.87E-11 | 15.87866 |
| ITGAV        | 0.633416 | 10.638   | 6.957478 | 9.30E-12 | 9.02E-11 | 15.8602  |
| POU2F3       | -0.61141 | 4.565421 | -6.95569 | 9.41E-12 | 9.12E-11 | 15.84873 |
| CCND2        | 0.564197 | 6.663222 | 6.946747 | 9.98E-12 | 9.63E-11 | 15.79149 |
| KLF2         | 0.531159 | 8.038075 | 6.934714 | 1.08E-11 | 1.04E-10 | 15.71454 |
| BHMT2        | 0.506566 | 5.51423  | 6.92941  | 1.12E-11 | 1.07E-10 | 15.68066 |
| HIST1H3B     | -0.83185 | 4.514396 | -6.90794 | 1.29E-11 | 1.22E-10 | 15.54375 |

|         |          |          |          |          |          |          |
|---------|----------|----------|----------|----------|----------|----------|
| SDC2    | 0.523528 | 8.440387 | 6.906484 | 1.30E-11 | 1.23E-10 | 15.53446 |
| MYL3    | 0.548207 | 4.750748 | 6.906189 | 1.30E-11 | 1.23E-10 | 15.53258 |
| MYL7    | 0.510967 | 4.26163  | 6.903924 | 1.32E-11 | 1.25E-10 | 15.51816 |
| MOCOS   | -0.55567 | 6.797205 | -6.89963 | 1.36E-11 | 1.28E-10 | 15.49084 |
| GLRA3   | -0.5013  | 3.56989  | -6.88244 | 1.52E-11 | 1.43E-10 | 15.38157 |
| C1QA    | 0.751351 | 8.749876 | 6.87935  | 1.55E-11 | 1.45E-10 | 15.36196 |
| PNOC    | 0.629887 | 5.24906  | 6.873023 | 1.61E-11 | 1.51E-10 | 15.32181 |
| PDE1B   | 0.580679 | 4.809859 | 6.871263 | 1.63E-11 | 1.53E-10 | 15.31065 |
| PCDHB11 | 0.599717 | 4.482655 | 6.86826  | 1.66E-11 | 1.56E-10 | 15.29162 |
| BTC     | -0.50345 | 4.429254 | -6.86648 | 1.68E-11 | 1.57E-10 | 15.28037 |
| ASNS    | -0.66278 | 6.835617 | -6.86294 | 1.72E-11 | 1.60E-10 | 15.25792 |
| CTSS    | 0.646285 | 8.304086 | 6.852655 | 1.84E-11 | 1.71E-10 | 15.19281 |
| LXN     | 0.784591 | 8.516794 | 6.851494 | 1.86E-11 | 1.72E-10 | 15.18546 |
| NUBPL   | 0.503332 | 6.820699 | 6.851419 | 1.86E-11 | 1.72E-10 | 15.18499 |
| KLF4    | 0.556669 | 7.369183 | 6.844269 | 1.94E-11 | 1.80E-10 | 15.13978 |
| SLC5A2  | 0.573512 | 5.237496 | 6.843944 | 1.95E-11 | 1.80E-10 | 15.13773 |
| GPR137B | 0.546638 | 8.994001 | 6.841711 | 1.98E-11 | 1.82E-10 | 15.12362 |
| SLC12A5 | -0.62902 | 4.162669 | -6.84139 | 1.98E-11 | 1.83E-10 | 15.12159 |
| CCL5    | 0.804458 | 8.520577 | 6.839158 | 2.01E-11 | 1.85E-10 | 15.10749 |
| SHBG    | 0.565294 | 4.655459 | 6.838729 | 2.02E-11 | 1.85E-10 | 15.10479 |
| CAV3    | 0.620326 | 5.191344 | 6.83732  | 2.03E-11 | 1.87E-10 | 15.09589 |
| PLAC8   | 0.839346 | 6.53997  | 6.83616  | 2.05E-11 | 1.88E-10 | 15.08857 |
| CYP27B1 | -0.58069 | 5.324465 | -6.83513 | 2.06E-11 | 1.89E-10 | 15.08205 |
| GSTTP1  | 0.521545 | 4.294089 | 6.8321   | 2.10E-11 | 1.92E-10 | 15.06294 |
| TFAP2B  | 1.214024 | 7.165357 | 6.823016 | 2.23E-11 | 2.03E-10 | 15.00565 |
| APRT    | -0.5032  | 8.751769 | -6.816   | 2.33E-11 | 2.12E-10 | 14.96148 |
| HTR5A   | 0.522338 | 4.184701 | 6.808549 | 2.45E-11 | 2.22E-10 | 14.91456 |
| CD180   | 0.511606 | 6.288285 | 6.805203 | 2.50E-11 | 2.26E-10 | 14.89351 |
| CD3E    | 0.795051 | 5.95934  | 6.801708 | 2.56E-11 | 2.31E-10 | 14.87154 |
| TTR     | 0.583501 | 5.041453 | 6.789209 | 2.77E-11 | 2.50E-10 | 14.79303 |
| TAC1    | 0.884403 | 4.338171 | 6.788109 | 2.79E-11 | 2.51E-10 | 14.78613 |
| ICK     | -0.61564 | 5.705719 | -6.78443 | 2.86E-11 | 2.57E-10 | 14.76308 |
| IL10RA  | 0.541314 | 8.100197 | 6.781323 | 2.92E-11 | 2.61E-10 | 14.74357 |
| SCG5    | 0.757144 | 6.801807 | 6.781195 | 2.92E-11 | 2.61E-10 | 14.74277 |
| ADCK4   | -0.51696 | 5.637157 | -6.77978 | 2.95E-11 | 2.64E-10 | 14.73392 |
| GRP     | 0.898037 | 6.910225 | 6.777376 | 2.99E-11 | 2.67E-10 | 14.71883 |
| HOXB2   | 0.76983  | 8.598383 | 6.777313 | 2.99E-11 | 2.67E-10 | 14.71843 |
| C5AR1   | 0.593495 | 6.558453 | 6.774749 | 3.04E-11 | 2.71E-10 | 14.70237 |
| FAM107A | 0.599909 | 6.07059  | 6.77247  | 3.09E-11 | 2.75E-10 | 14.68809 |
| CYBRD1  | 1.015348 | 8.778563 | 6.768629 | 3.16E-11 | 2.80E-10 | 14.66404 |
| PF4     | 0.535793 | 4.741872 | 6.762205 | 3.30E-11 | 2.91E-10 | 14.62385 |
| FPR3    | 0.6625   | 6.985719 | 6.759309 | 3.36E-11 | 2.96E-10 | 14.60574 |
| FBXO2   | -0.52276 | 6.146362 | -6.75697 | 3.41E-11 | 3.00E-10 | 14.59109 |
| CORO1A  | 0.596933 | 8.33725  | 6.755825 | 3.43E-11 | 3.02E-10 | 14.58396 |

|           |          |          |          |          |          |          |
|-----------|----------|----------|----------|----------|----------|----------|
| RHBDD3    | -0.53036 | 6.798671 | -6.74809 | 3.61E-11 | 3.16E-10 | 14.53562 |
| LRP8      | -0.57941 | 6.386336 | -6.73877 | 3.83E-11 | 3.34E-10 | 14.4775  |
| NGFR      | 0.508878 | 5.132401 | 6.736331 | 3.89E-11 | 3.39E-10 | 14.46228 |
| CD33      | 0.620119 | 5.337465 | 6.733365 | 3.96E-11 | 3.45E-10 | 14.4438  |
| PRKCQ     | 0.584374 | 5.388456 | 6.723989 | 4.21E-11 | 3.65E-10 | 14.3854  |
| PSORS1C2  | 0.55409  | 5.028957 | 6.714583 | 4.47E-11 | 3.85E-10 | 14.32689 |
| IGFBP4    | 0.764672 | 10.0804  | 6.712774 | 4.52E-11 | 3.89E-10 | 14.31564 |
| TRAP1     | -0.75089 | 7.818894 | -6.70805 | 4.66E-11 | 4.00E-10 | 14.28627 |
| LRRTM4    | -0.54064 | 3.223883 | -6.70721 | 4.68E-11 | 4.02E-10 | 14.28108 |
| PLA2G2F   | -0.53388 | 4.503051 | -6.70459 | 4.76E-11 | 4.08E-10 | 14.26478 |
| PRR16     | 0.546918 | 5.10492  | 6.703924 | 4.78E-11 | 4.09E-10 | 14.26067 |
| CD163     | 0.544593 | 6.989613 | 6.702603 | 4.82E-11 | 4.13E-10 | 14.25246 |
| UNG       | -0.61056 | 8.05588  | -6.702   | 4.84E-11 | 4.14E-10 | 14.24869 |
| KCNS1     | -0.72303 | 5.988707 | -6.69827 | 4.96E-11 | 4.23E-10 | 14.22557 |
| NFKBIL1   | 0.542296 | 6.088163 | 6.679781 | 5.57E-11 | 4.73E-10 | 14.111   |
| CCL7      | -0.69312 | 4.549381 | -6.67293 | 5.82E-11 | 4.92E-10 | 14.06865 |
| HSD17B10  | -0.50254 | 10.12915 | -6.67152 | 5.87E-11 | 4.96E-10 | 14.05992 |
| BCHE      | 0.818708 | 4.373977 | 6.671267 | 5.88E-11 | 4.97E-10 | 14.05834 |
| POLB      | -0.73114 | 7.881176 | -6.66636 | 6.07E-11 | 5.12E-10 | 14.02801 |
| EVI2A     | 0.755849 | 7.87693  | 6.664697 | 6.13E-11 | 5.16E-10 | 14.01774 |
| RBMS3     | 0.531078 | 6.314923 | 6.660577 | 6.30E-11 | 5.29E-10 | 13.99229 |
| RRAGB     | 0.50022  | 5.849962 | 6.659811 | 6.33E-11 | 5.31E-10 | 13.98756 |
| TIGD6     | -0.5303  | 4.32891  | -6.65967 | 6.33E-11 | 5.31E-10 | 13.98667 |
| IRS2      | 0.612463 | 8.70149  | 6.658895 | 6.36E-11 | 5.33E-10 | 13.98191 |
| SPAG5     | -0.57568 | 7.131624 | -6.65082 | 6.70E-11 | 5.60E-10 | 13.93208 |
| CRTAP     | 0.525539 | 8.33238  | 6.647599 | 6.83E-11 | 5.70E-10 | 13.91224 |
| DHRS11    | -0.50559 | 6.621668 | -6.64332 | 7.02E-11 | 5.85E-10 | 13.88586 |
| BTN3A3    | 0.503124 | 7.379521 | 6.639042 | 7.21E-11 | 6.00E-10 | 13.85952 |
| GPC4      | 0.707068 | 6.869607 | 6.634413 | 7.43E-11 | 6.17E-10 | 13.83103 |
| QPCTL     | -0.62205 | 5.105519 | -6.6322  | 7.53E-11 | 6.25E-10 | 13.81741 |
| GINS4     | -0.57088 | 5.068879 | -6.62996 | 7.64E-11 | 6.33E-10 | 13.80365 |
| DPY19L2P2 | -0.60416 | 4.311874 | -6.62364 | 7.95E-11 | 6.57E-10 | 13.76478 |
| PLAU      | 0.524487 | 7.801385 | 6.620827 | 8.09E-11 | 6.69E-10 | 13.74751 |
| TLR2      | 0.607812 | 7.582062 | 6.61597  | 8.34E-11 | 6.88E-10 | 13.71768 |
| FKBP4     | -0.83694 | 7.853252 | -6.61273 | 8.51E-11 | 7.02E-10 | 13.69782 |
| ZNF140    | 0.583896 | 7.3589   | 6.612306 | 8.54E-11 | 7.03E-10 | 13.6952  |
| HELLS     | -0.57422 | 5.886209 | -6.608   | 8.77E-11 | 7.21E-10 | 13.6688  |
| DSPP      | -0.65717 | 4.882938 | -6.60684 | 8.83E-11 | 7.26E-10 | 13.66169 |
| MDN1      | -0.55915 | 6.211738 | -6.60589 | 8.89E-11 | 7.29E-10 | 13.65583 |
| KAT2B     | 0.527517 | 7.227728 | 6.596243 | 9.44E-11 | 7.73E-10 | 13.59675 |
| ATP8B4    | 0.522875 | 4.85657  | 6.585725 | 1.01E-10 | 8.22E-10 | 13.53239 |
| MS4A2     | 0.558403 | 4.492299 | 6.575884 | 1.07E-10 | 8.67E-10 | 13.47226 |
| INVS      | -0.50083 | 4.714569 | -6.56939 | 1.12E-10 | 9.01E-10 | 13.43263 |
| FUT8      | 0.545965 | 7.960291 | 6.560414 | 1.18E-10 | 9.49E-10 | 13.37788 |

|          |          |          |          |          |          |          |
|----------|----------|----------|----------|----------|----------|----------|
| STAP2    | -0.51639 | 8.143446 | -6.55824 | 1.20E-10 | 9.61E-10 | 13.36463 |
| CTSZ     | 0.654502 | 7.51018  | 6.553183 | 1.24E-10 | 9.90E-10 | 13.33384 |
| ABCG2    | 0.544557 | 5.465005 | 6.551238 | 1.25E-10 | 1.00E-09 | 13.322   |
| LIN28A   | -0.60876 | 3.862112 | -6.54355 | 1.31E-10 | 1.05E-09 | 13.27524 |
| MELK     | -0.86463 | 7.899854 | -6.54279 | 1.32E-10 | 1.05E-09 | 13.27063 |
| SETBP1   | 0.589951 | 7.706236 | 6.541484 | 1.33E-10 | 1.06E-09 | 13.26267 |
| PLXDC2   | 0.741583 | 8.461314 | 6.52619  | 1.46E-10 | 1.16E-09 | 13.16979 |
| GPR18    | 0.766341 | 5.497298 | 6.524071 | 1.48E-10 | 1.17E-09 | 13.15694 |
| TK1      | -0.59445 | 7.625311 | -6.52042 | 1.52E-10 | 1.20E-09 | 13.1348  |
| ZNF835   | 0.612418 | 4.40025  | 6.519794 | 1.52E-10 | 1.20E-09 | 13.13101 |
| DNMT3B   | -0.57692 | 6.93622  | -6.5155  | 1.56E-10 | 1.23E-09 | 13.10501 |
| POLQ     | -0.50256 | 5.558299 | -6.50204 | 1.70E-10 | 1.33E-09 | 13.02355 |
| VRK1     | -0.5397  | 7.793208 | -6.49679 | 1.76E-10 | 1.37E-09 | 12.9918  |
| HYAL1    | 0.508352 | 4.719269 | 6.496054 | 1.76E-10 | 1.38E-09 | 12.98733 |
| PHGDH    | -0.59436 | 8.041248 | -6.48623 | 1.87E-10 | 1.46E-09 | 12.928   |
| FAM53B   | -0.55883 | 6.446345 | -6.48534 | 1.88E-10 | 1.46E-09 | 12.92267 |
| DLX4     | -0.50772 | 4.792928 | -6.48167 | 1.93E-10 | 1.50E-09 | 12.9005  |
| AASS     | 0.589152 | 5.220162 | 6.471594 | 2.05E-10 | 1.59E-09 | 12.83978 |
| CCNE1    | -0.52398 | 5.90784  | -6.46362 | 2.16E-10 | 1.66E-09 | 12.79176 |
| KIF18B   | -0.54792 | 6.956907 | -6.46351 | 2.16E-10 | 1.66E-09 | 12.79114 |
| RAX      | 0.527374 | 4.950773 | 6.462701 | 2.17E-10 | 1.67E-09 | 12.78625 |
| FMO3     | 0.631154 | 4.939158 | 6.458736 | 2.22E-10 | 1.70E-09 | 12.76241 |
| APOBEC3B | -0.77238 | 7.485678 | -6.45584 | 2.26E-10 | 1.73E-09 | 12.745   |
| PPEF1    | 0.59879  | 5.402883 | 6.452459 | 2.31E-10 | 1.77E-09 | 12.72468 |
| HSD11B1  | 0.529821 | 5.969453 | 6.44128  | 2.47E-10 | 1.88E-09 | 12.65758 |
| FNDC4    | 0.558028 | 5.901898 | 6.425107 | 2.73E-10 | 2.07E-09 | 12.56068 |
| KCNJ3    | -0.81827 | 4.417163 | -6.41754 | 2.86E-10 | 2.16E-09 | 12.51539 |
| SCML1    | 0.568131 | 6.330506 | 6.408468 | 3.03E-10 | 2.27E-09 | 12.4612  |
| PLEKHF1  | 0.51919  | 7.017451 | 6.406992 | 3.05E-10 | 2.29E-09 | 12.45238 |
| SIX3     | -0.54582 | 4.285687 | -6.40459 | 3.10E-10 | 2.32E-09 | 12.43805 |
| IRF9     | 0.566553 | 9.0503   | 6.403617 | 3.12E-10 | 2.33E-09 | 12.43224 |
| CCL2     | 0.756427 | 8.79973  | 6.391591 | 3.35E-10 | 2.50E-09 | 12.36053 |
| TPSG1    | 0.544525 | 5.859952 | 6.385733 | 3.48E-10 | 2.58E-09 | 12.32564 |
| PDLIM3   | 0.504616 | 6.502821 | 6.375467 | 3.70E-10 | 2.74E-09 | 12.26457 |
| SCG2     | 0.55224  | 4.89306  | 6.374323 | 3.73E-10 | 2.76E-09 | 12.25777 |
| ADAMTS1  | 0.566185 | 6.828053 | 6.362064 | 4.02E-10 | 2.96E-09 | 12.18496 |
| SCARB1   | -0.51387 | 6.048132 | -6.35757 | 4.13E-10 | 3.04E-09 | 12.15833 |
| SH3BP5   | 0.544943 | 9.16238  | 6.348872 | 4.35E-10 | 3.19E-09 | 12.10675 |
| GJA1     | 0.812395 | 10.81035 | 6.346032 | 4.43E-10 | 3.24E-09 | 12.08993 |
| NR0B2    | 0.513919 | 4.842912 | 6.341809 | 4.54E-10 | 3.32E-09 | 12.06493 |
| SH3BP1   | 0.525863 | 5.634444 | 6.332985 | 4.79E-10 | 3.50E-09 | 12.01274 |
| ZNF544   | -0.6344  | 7.337939 | -6.32978 | 4.89E-10 | 3.56E-09 | 11.99381 |
| COL16A1  | 0.594134 | 8.670938 | 6.329241 | 4.90E-10 | 3.57E-09 | 11.99062 |
| DHCR7    | -0.5199  | 8.04822  | -6.32773 | 4.95E-10 | 3.60E-09 | 11.9817  |

|           |          |          |          |          |          |          |
|-----------|----------|----------|----------|----------|----------|----------|
| CKS2      | -0.64665 | 9.924307 | -6.32715 | 4.97E-10 | 3.62E-09 | 11.97825 |
| ITGB2     | 0.562891 | 7.97072  | 6.325022 | 5.03E-10 | 3.66E-09 | 11.9657  |
| CD36      | 0.761897 | 6.728531 | 6.32164  | 5.13E-10 | 3.73E-09 | 11.94574 |
| MT1M      | 0.743678 | 5.445465 | 6.320891 | 5.16E-10 | 3.74E-09 | 11.94132 |
| EGR1      | 0.786346 | 9.558469 | 6.314262 | 5.37E-10 | 3.89E-09 | 11.90222 |
| NAP1L2    | 0.640859 | 5.037751 | 6.308781 | 5.55E-10 | 4.01E-09 | 11.86993 |
| ISYNA1    | -0.6831  | 6.776465 | -6.30332 | 5.74E-10 | 4.12E-09 | 11.83778 |
| EGFL6     | 0.752357 | 6.54786  | 6.290455 | 6.20E-10 | 4.44E-09 | 11.76211 |
| HIST1H2AM | -0.5799  | 5.517721 | -6.28433 | 6.43E-10 | 4.59E-09 | 11.72613 |
| NEFH      | 0.636743 | 5.60487  | 6.276071 | 6.76E-10 | 4.81E-09 | 11.67767 |
| CHCHD3    | -0.67548 | 7.454441 | -6.2537  | 7.74E-10 | 5.47E-09 | 11.54666 |
| PIM2      | 0.631287 | 6.771044 | 6.252965 | 7.77E-10 | 5.49E-09 | 11.54239 |
| CTSW      | 0.709357 | 5.502985 | 6.248041 | 8.00E-10 | 5.65E-09 | 11.51362 |
| ERI2      | -0.70604 | 6.277366 | -6.24547 | 8.13E-10 | 5.73E-09 | 11.49859 |
| RND3      | 0.574982 | 9.45366  | 6.242218 | 8.29E-10 | 5.82E-09 | 11.47962 |
| ITGA7     | 0.551644 | 5.47794  | 6.225482 | 9.16E-10 | 6.39E-09 | 11.38206 |
| C5orf42   | -0.60285 | 4.712352 | -6.22429 | 9.23E-10 | 6.43E-09 | 11.37514 |
| NUP93     | -0.55537 | 6.826186 | -6.21969 | 9.48E-10 | 6.60E-09 | 11.34837 |
| ZFY       | -0.54398 | 3.37027  | -6.21824 | 9.57E-10 | 6.65E-09 | 11.33993 |
| REG3A     | -0.52306 | 4.302957 | -6.21593 | 9.70E-10 | 6.74E-09 | 11.3265  |
| MME       | 0.731576 | 6.265964 | 6.206328 | 1.03E-09 | 7.11E-09 | 11.27068 |
| SFN       | -0.62407 | 9.301794 | -6.20624 | 1.03E-09 | 7.11E-09 | 11.27019 |
| ADIRF     | 0.853272 | 9.354447 | 6.205793 | 1.03E-09 | 7.12E-09 | 11.26758 |
| TFCP2L1   | -0.55936 | 6.558803 | -6.20368 | 1.04E-09 | 7.20E-09 | 11.2553  |
| IBTK      | -0.53988 | 6.402736 | -6.19667 | 1.09E-09 | 7.49E-09 | 11.21462 |
| CCR2      | 0.520719 | 5.467009 | 6.191707 | 1.12E-09 | 7.70E-09 | 11.18586 |
| BUB1B     | -0.63056 | 7.289002 | -6.19008 | 1.13E-09 | 7.77E-09 | 11.17645 |
| SLCO2B1   | 0.551655 | 6.62974  | 6.186758 | 1.15E-09 | 7.92E-09 | 11.15719 |
| FIP1L1    | -0.50521 | 6.988352 | -6.18423 | 1.17E-09 | 8.02E-09 | 11.14255 |
| STAT4     | 0.507381 | 6.23142  | 6.18411  | 1.17E-09 | 8.02E-09 | 11.14186 |
| ARL15     | 0.642247 | 6.615747 | 6.178259 | 1.21E-09 | 8.27E-09 | 11.10801 |
| SRGN      | 0.574448 | 9.298116 | 6.175401 | 1.23E-09 | 8.39E-09 | 11.09148 |
| PLA1A     | 0.539638 | 5.201216 | 6.166533 | 1.30E-09 | 8.82E-09 | 11.04023 |
| IGFBP7    | 0.562363 | 9.870514 | 6.166176 | 1.30E-09 | 8.83E-09 | 11.03818 |
| KIF21B    | 0.612613 | 5.076025 | 6.154592 | 1.40E-09 | 9.44E-09 | 10.97134 |
| ITGA2     | 0.557874 | 7.539842 | 6.151939 | 1.42E-09 | 9.55E-09 | 10.95605 |
| RELN      | 0.522044 | 5.587662 | 6.115892 | 1.76E-09 | 1.17E-08 | 10.74887 |
| TLR4      | 0.521735 | 5.980448 | 6.109643 | 1.82E-09 | 1.21E-08 | 10.71306 |
| KPTN      | -0.5204  | 7.146384 | -6.09717 | 1.96E-09 | 1.29E-08 | 10.64169 |
| SUSD4     | -0.61323 | 6.475373 | -6.0924  | 2.02E-09 | 1.33E-08 | 10.6144  |
| COX7A1    | 0.619976 | 7.944629 | 6.083177 | 2.13E-09 | 1.40E-08 | 10.56176 |
| KRT9      | 0.527574 | 4.970124 | 6.075209 | 2.23E-09 | 1.46E-08 | 10.51632 |
| NUP153    | -0.51069 | 7.95089  | -6.07354 | 2.25E-09 | 1.47E-08 | 10.50683 |
| NOSIP     | -0.52418 | 9.091857 | -6.06097 | 2.42E-09 | 1.58E-08 | 10.43525 |

|          |          |          |          |          |          |          |
|----------|----------|----------|----------|----------|----------|----------|
| SYCP2    | -0.58823 | 5.437829 | -6.04335 | 2.69E-09 | 1.73E-08 | 10.33519 |
| POP7     | -0.5746  | 9.167324 | -6.03292 | 2.86E-09 | 1.83E-08 | 10.27607 |
| TFAP2A   | -0.57067 | 7.680849 | -6.0315  | 2.88E-09 | 1.85E-08 | 10.26803 |
| SMPDL3B  | -0.50919 | 5.632799 | -6.02954 | 2.91E-09 | 1.86E-08 | 10.2569  |
| MYOD1    | 0.536077 | 4.669786 | 6.02836  | 2.93E-09 | 1.88E-08 | 10.25023 |
| QPCT     | 0.747435 | 6.970843 | 6.025132 | 2.99E-09 | 1.91E-08 | 10.23196 |
| MAGEH1   | 0.595439 | 8.464747 | 6.023061 | 3.02E-09 | 1.93E-08 | 10.22025 |
| BANF1    | -0.52437 | 10.14742 | -6.02201 | 3.04E-09 | 1.94E-08 | 10.21428 |
| KDELC1   | 0.516633 | 6.586901 | 5.996702 | 3.53E-09 | 2.23E-08 | 10.07145 |
| KIF2C    | -0.63574 | 6.698963 | -5.98895 | 3.69E-09 | 2.32E-08 | 10.02781 |
| CADPS2   | 0.559306 | 8.263075 | 5.964875 | 4.24E-09 | 2.65E-08 | 9.892553 |
| E2F4     | 0.514046 | 6.845433 | 5.964573 | 4.25E-09 | 2.65E-08 | 9.890858 |
| FGFR3    | -0.53741 | 5.794196 | -5.95536 | 4.48E-09 | 2.79E-08 | 9.839221 |
| LCK      | 0.52661  | 6.711861 | 5.953841 | 4.52E-09 | 2.81E-08 | 9.830726 |
| PDZRN4   | 0.587782 | 4.196027 | 5.949656 | 4.63E-09 | 2.87E-08 | 9.807306 |
| SOCS2    | 0.505287 | 6.48701  | 5.938602 | 4.93E-09 | 3.05E-08 | 9.745507 |
| FAM198B  | 0.669801 | 7.858005 | 5.936671 | 4.99E-09 | 3.08E-08 | 9.734727 |
| POSTN    | 0.731918 | 9.089889 | 5.934289 | 5.05E-09 | 3.12E-08 | 9.721428 |
| CHRNB1   | 0.527739 | 5.581063 | 5.924352 | 5.35E-09 | 3.29E-08 | 9.665997 |
| DUSP6    | 0.630409 | 8.741811 | 5.909489 | 5.83E-09 | 3.57E-08 | 9.58324  |
| IL12RB2  | -0.5949  | 4.597323 | -5.90782 | 5.88E-09 | 3.60E-08 | 9.573969 |
| SERPINB3 | -0.53204 | 3.57268  | -5.90393 | 6.02E-09 | 3.67E-08 | 9.552362 |
| C1QTNF3  | 0.534961 | 6.684159 | 5.902365 | 6.07E-09 | 3.70E-08 | 9.543641 |
| CBX6     | 0.503259 | 8.466992 | 5.900673 | 6.13E-09 | 3.73E-08 | 9.534242 |
| ABLIM3   | 0.538008 | 6.521138 | 5.900471 | 6.14E-09 | 3.73E-08 | 9.533121 |
| NXN      | 0.571637 | 9.461731 | 5.892194 | 6.43E-09 | 3.91E-08 | 9.487178 |
| CLDN3    | -0.64291 | 8.918182 | -5.89177 | 6.45E-09 | 3.91E-08 | 9.484843 |
| POLR3B   | -0.60528 | 6.155231 | -5.882   | 6.82E-09 | 4.12E-08 | 9.430679 |
| 11-Sep   | 0.545334 | 7.659163 | 5.88024  | 6.89E-09 | 4.16E-08 | 9.420927 |
| UBE3C    | -0.71358 | 6.624233 | -5.87166 | 7.23E-09 | 4.35E-08 | 9.373449 |
| SUV39H2  | -0.55974 | 5.425899 | -5.86653 | 7.45E-09 | 4.47E-08 | 9.345106 |
| ZNF428   | 0.579945 | 5.671118 | 5.864131 | 7.55E-09 | 4.53E-08 | 9.331844 |
| PRR11    | -0.75011 | 9.486623 | -5.86135 | 7.67E-09 | 4.59E-08 | 9.316483 |
| CYP24A1  | -0.5948  | 3.733717 | -5.83883 | 8.72E-09 | 5.16E-08 | 9.192347 |
| SGK1     | 0.605043 | 9.651658 | 5.831998 | 9.06E-09 | 5.35E-08 | 9.154783 |
| SCGB2A2  | 1.658154 | 10.11289 | 5.828315 | 9.25E-09 | 5.46E-08 | 9.134543 |
| NCSTN    | -0.61388 | 7.682601 | -5.82768 | 9.29E-09 | 5.47E-08 | 9.13107  |
| FAM64A   | -0.52692 | 6.442533 | -5.81767 | 9.83E-09 | 5.77E-08 | 9.076094 |
| FILIP1L  | 0.532467 | 7.125824 | 5.80005  | 1.09E-08 | 6.32E-08 | 8.979601 |
| CD19     | 0.555427 | 5.278504 | 5.799405 | 1.09E-08 | 6.34E-08 | 8.976074 |
| EFEMP1   | 0.624872 | 8.11612  | 5.788661 | 1.16E-08 | 6.70E-08 | 8.917358 |
| MTHFD2   | -0.53867 | 8.734532 | -5.78801 | 1.16E-08 | 6.72E-08 | 8.913815 |
| IGLL3P   | 0.737992 | 9.768072 | 5.783176 | 1.19E-08 | 6.89E-08 | 8.887424 |
| BIRC5    | -0.60544 | 6.55865  | -5.78169 | 1.20E-08 | 6.93E-08 | 8.87929  |

|          |          |          |          |          |          |          |
|----------|----------|----------|----------|----------|----------|----------|
| MATN3    | 0.798302 | 5.307735 | 5.773691 | 1.26E-08 | 7.22E-08 | 8.835715 |
| SUZ12    | -0.74042 | 7.853402 | -5.75961 | 1.36E-08 | 7.80E-08 | 8.759104 |
| HIST1H3F | -0.6466  | 4.012648 | -5.75263 | 1.42E-08 | 8.07E-08 | 8.721177 |
| NDC80    | -0.72255 | 6.641558 | -5.74445 | 1.48E-08 | 8.43E-08 | 8.676768 |
| HGS      | -0.52704 | 7.67515  | -5.72975 | 1.61E-08 | 9.10E-08 | 8.597172 |
| ABCA8    | 0.654779 | 5.396614 | 5.726399 | 1.64E-08 | 9.25E-08 | 8.579022 |
| RCBTB1   | -0.50499 | 5.933431 | -5.71977 | 1.70E-08 | 9.55E-08 | 8.543186 |
| KLK11    | 0.818564 | 5.909895 | 5.703706 | 1.86E-08 | 1.04E-07 | 8.456517 |
| EPN3     | -0.53104 | 6.95686  | -5.70318 | 1.87E-08 | 1.04E-07 | 8.453682 |
| FKBP9    | 0.518658 | 9.337669 | 5.701808 | 1.88E-08 | 1.05E-07 | 8.446289 |
| CLDN5    | 0.522073 | 7.233562 | 5.701223 | 1.89E-08 | 1.05E-07 | 8.44314  |
| IL2RB    | 0.511446 | 7.414917 | 5.700671 | 1.89E-08 | 1.05E-07 | 8.440166 |
| HIC1     | 0.602237 | 4.830156 | 5.69381  | 1.97E-08 | 1.09E-07 | 8.403229 |
| DIP2A    | -0.50887 | 6.732379 | -5.68268 | 2.09E-08 | 1.15E-07 | 8.343381 |
| SPINK1   | -0.61898 | 4.432165 | -5.6784  | 2.14E-08 | 1.18E-07 | 8.320434 |
| HMGB2    | -0.6461  | 8.473547 | -5.67629 | 2.17E-08 | 1.19E-07 | 8.309089 |
| CEMIP    | 0.520143 | 5.706686 | 5.675419 | 2.18E-08 | 1.20E-07 | 8.304425 |
| NKG7     | 0.628485 | 6.351292 | 5.67417  | 2.19E-08 | 1.20E-07 | 8.297725 |
| NBEA     | 0.553499 | 6.690772 | 5.66804  | 2.27E-08 | 1.24E-07 | 8.264857 |
| RRM2     | -0.88549 | 8.507525 | -5.66343 | 2.33E-08 | 1.27E-07 | 8.240154 |
| SELE     | 0.560521 | 5.406289 | 5.647988 | 2.53E-08 | 1.37E-07 | 8.15758  |
| NBAS     | -0.54415 | 7.190024 | -5.64303 | 2.60E-08 | 1.41E-07 | 8.131081 |
| DIAPH3   | -0.60317 | 4.339839 | -5.63441 | 2.73E-08 | 1.47E-07 | 8.08513  |
| KIF14    | -0.61496 | 6.126381 | -5.63279 | 2.76E-08 | 1.48E-07 | 8.076519 |
| CXCR2    | -0.50979 | 4.422081 | -5.62663 | 2.85E-08 | 1.53E-07 | 8.043662 |
| SSTR3    | 0.539415 | 4.982122 | 5.625685 | 2.87E-08 | 1.54E-07 | 8.038659 |
| TTK      | -0.75349 | 6.799006 | -5.61251 | 3.08E-08 | 1.65E-07 | 7.96858  |
| PHKG2    | -0.56937 | 6.149035 | -5.61157 | 3.10E-08 | 1.65E-07 | 7.963591 |
| ANKS1B   | -0.51037 | 4.344597 | -5.60594 | 3.19E-08 | 1.70E-07 | 7.933705 |
| CDH1     | -0.64312 | 8.509061 | -5.60291 | 3.25E-08 | 1.73E-07 | 7.917673 |
| PCDH8    | -0.55334 | 3.48199  | -5.59993 | 3.30E-08 | 1.75E-07 | 7.901873 |
| CLCN6    | 0.504062 | 5.985207 | 5.575062 | 3.78E-08 | 1.98E-07 | 7.770299 |
| MSLN     | -0.75803 | 4.671882 | -5.56696 | 3.95E-08 | 2.06E-07 | 7.727571 |
| KRT20    | -0.53426 | 4.011919 | -5.56057 | 4.09E-08 | 2.13E-07 | 7.693871 |
| CYP7B1   | -0.58223 | 5.39033  | -5.55806 | 4.15E-08 | 2.16E-07 | 7.680667 |
| MMP13    | 0.745641 | 6.059382 | 5.550403 | 4.32E-08 | 2.24E-07 | 7.640366 |
| CDCA8    | -0.59141 | 6.665567 | -5.54024 | 4.57E-08 | 2.36E-07 | 7.58698  |
| GDF10    | 0.543743 | 4.57712  | 5.536955 | 4.65E-08 | 2.40E-07 | 7.569723 |
| CRISP2   | -0.55938 | 3.840504 | -5.53176 | 4.78E-08 | 2.47E-07 | 7.542483 |
| ECM1     | 0.544974 | 8.145318 | 5.531114 | 4.80E-08 | 2.48E-07 | 7.539092 |
| SAC3D1   | -0.50023 | 8.475097 | -5.5192  | 5.12E-08 | 2.62E-07 | 7.476698 |
| HOXC13   | 0.530015 | 5.97216  | 5.519015 | 5.13E-08 | 2.63E-07 | 7.475727 |
| LIAS     | 0.539245 | 6.159876 | 5.517656 | 5.16E-08 | 2.64E-07 | 7.468617 |
| MYH11    | 0.509973 | 6.226414 | 5.503153 | 5.59E-08 | 2.84E-07 | 7.392849 |

|          |          |          |          |          |          |          |
|----------|----------|----------|----------|----------|----------|----------|
| HOXB7    | 0.514682 | 6.868215 | 5.499208 | 5.71E-08 | 2.90E-07 | 7.372267 |
| EGR3     | 0.647104 | 7.670859 | 5.495767 | 5.81E-08 | 2.95E-07 | 7.354326 |
| LY86     | 0.584901 | 7.992506 | 5.490021 | 5.99E-08 | 3.03E-07 | 7.324391 |
| PKIA     | 0.5358   | 5.775553 | 5.47106  | 6.64E-08 | 3.33E-07 | 7.225814 |
| CD8A     | 0.535237 | 7.314496 | 5.470639 | 6.65E-08 | 3.34E-07 | 7.22363  |
| EGR2     | 0.605071 | 8.165613 | 5.465452 | 6.84E-08 | 3.43E-07 | 7.196721 |
| ATP6V0C  | 0.60301  | 9.903233 | 5.446956 | 7.55E-08 | 3.76E-07 | 7.100944 |
| MS4A1    | 0.683986 | 5.981247 | 5.433821 | 8.10E-08 | 4.02E-07 | 7.033105 |
| KIAA0101 | -0.63078 | 8.180942 | -5.41281 | 9.06E-08 | 4.44E-07 | 6.924901 |
| SCUBE2   | 1.073502 | 8.748075 | 5.403151 | 9.54E-08 | 4.65E-07 | 6.875287 |
| MAD2L1   | -0.55009 | 6.788551 | -5.39118 | 1.02E-07 | 4.93E-07 | 6.813905 |
| GZMA     | 0.642764 | 6.892182 | 5.385505 | 1.05E-07 | 5.07E-07 | 6.784851 |
| SELL     | 0.633133 | 6.998906 | 5.376091 | 1.10E-07 | 5.29E-07 | 6.736714 |
| CTNNA1   | 0.537622 | 7.643752 | 5.363621 | 1.18E-07 | 5.62E-07 | 6.673067 |
| SNX29P2  | -0.50921 | 4.434256 | -5.35393 | 1.24E-07 | 5.89E-07 | 6.623719 |
| ORC6     | -0.66283 | 7.752109 | -5.34288 | 1.31E-07 | 6.21E-07 | 6.567493 |
| PIK3R4   | -0.55057 | 5.446701 | -5.34199 | 1.32E-07 | 6.24E-07 | 6.562973 |
| DUSP4    | 0.762237 | 8.497033 | 5.337063 | 1.35E-07 | 6.38E-07 | 6.537962 |
| LIMA1    | 0.510567 | 8.964772 | 5.325388 | 1.44E-07 | 6.76E-07 | 6.478758 |
| CAMK2N1  | 0.679898 | 8.430173 | 5.324193 | 1.45E-07 | 6.79E-07 | 6.472706 |
| SUCLG1   | -0.56372 | 8.323079 | -5.30248 | 1.62E-07 | 7.58E-07 | 6.362937 |
| CDH19    | -0.51534 | 4.066593 | -5.29677 | 1.67E-07 | 7.79E-07 | 6.334159 |
| CNGB3    | -0.52117 | 4.22462  | -5.29358 | 1.70E-07 | 7.91E-07 | 6.318047 |
| HPRT1    | -0.65295 | 7.766874 | -5.29087 | 1.72E-07 | 8.02E-07 | 6.304427 |
| NPTX2    | 0.507261 | 5.122752 | 5.282422 | 1.80E-07 | 8.36E-07 | 6.261908 |
| PTTG1    | -0.72972 | 8.955671 | -5.28167 | 1.81E-07 | 8.39E-07 | 6.258119 |
| HOXC8    | -0.51141 | 5.750634 | -5.25944 | 2.03E-07 | 9.35E-07 | 6.14658  |
| VSNL1    | 0.503585 | 6.079054 | 5.242696 | 2.21E-07 | 1.01E-06 | 6.062824 |
| SKA1     | -0.50864 | 4.398562 | -5.23236 | 2.33E-07 | 1.06E-06 | 6.011247 |
| UCN      | -0.60745 | 5.463488 | -5.21708 | 2.53E-07 | 1.14E-06 | 5.935166 |
| KIF18A   | -0.50571 | 5.206838 | -5.21323 | 2.58E-07 | 1.16E-06 | 5.916044 |
| CENPU    | -0.56337 | 7.496682 | -5.19795 | 2.79E-07 | 1.25E-06 | 5.840207 |
| EXTL2    | 0.579202 | 7.368327 | 5.191905 | 2.88E-07 | 1.29E-06 | 5.810287 |
| PTTG3P   | -0.52888 | 5.175569 | -5.17808 | 3.09E-07 | 1.37E-06 | 5.741951 |
| RAB3GAP2 | -0.64117 | 4.334332 | -5.17116 | 3.20E-07 | 1.42E-06 | 5.707805 |
| TDP1     | -0.5212  | 6.757758 | -5.16336 | 3.33E-07 | 1.47E-06 | 5.669353 |
| MXI1     | 0.579675 | 9.612465 | 5.146698 | 3.62E-07 | 1.58E-06 | 5.587397 |
| UQCRC1   | -0.59331 | 9.967174 | -5.14041 | 3.74E-07 | 1.63E-06 | 5.556561 |
| OBP2A    | 0.502457 | 5.129318 | 5.123424 | 4.08E-07 | 1.76E-06 | 5.473344 |
| RBP4     | 0.514876 | 5.23343  | 5.091592 | 4.79E-07 | 2.05E-06 | 5.318113 |
| INHBA    | 0.51373  | 7.656146 | 5.078496 | 5.12E-07 | 2.18E-06 | 5.254506 |
| CARS2    | -0.60972 | 6.535211 | -5.04778 | 5.98E-07 | 2.51E-06 | 5.105908 |
| IGFBP2   | 0.681553 | 8.63791  | 5.04578  | 6.04E-07 | 2.54E-06 | 5.096264 |
| HPGD     | 0.649263 | 5.419022 | 5.042411 | 6.14E-07 | 2.58E-06 | 5.080021 |

|           |          |          |          |          |          |          |
|-----------|----------|----------|----------|----------|----------|----------|
| RTN1      | 0.51731  | 7.061953 | 5.017401 | 6.96E-07 | 2.90E-06 | 4.959757 |
| TCEAL2    | 0.501342 | 4.603983 | 5.01559  | 7.02E-07 | 2.92E-06 | 4.951069 |
| LYVE1     | 0.564438 | 4.9359   | 5.013124 | 7.11E-07 | 2.95E-06 | 4.939243 |
| C8orf4    | 0.7881   | 7.976466 | 4.998108 | 7.66E-07 | 3.16E-06 | 4.867355 |
| CTNNB1    | 0.524341 | 9.535378 | 4.992878 | 7.86E-07 | 3.24E-06 | 4.842365 |
| UGT8      | -0.60344 | 4.684808 | -4.98932 | 8.00E-07 | 3.30E-06 | 4.825357 |
| HIST1H1C  | -0.64838 | 9.006367 | -4.9882  | 8.04E-07 | 3.31E-06 | 4.820012 |
| ZNF160    | -0.75386 | 7.659492 | -4.98535 | 8.16E-07 | 3.36E-06 | 4.806417 |
| SOWAHC    | 0.548611 | 8.171058 | 4.975182 | 8.58E-07 | 3.52E-06 | 4.757983 |
| ZNF665    | 0.787863 | 7.829338 | 4.975092 | 8.58E-07 | 3.52E-06 | 4.757558 |
| B4GALT3   | -0.50136 | 7.399429 | -4.96377 | 9.08E-07 | 3.70E-06 | 4.703701 |
| REPIN1    | -0.50955 | 8.366362 | -4.95137 | 9.65E-07 | 3.91E-06 | 4.644869 |
| LINC00328 | -0.61896 | 3.69074  | -4.932   | 1.06E-06 | 4.26E-06 | 4.553245 |
| EPHX2     | 0.526887 | 6.375941 | 4.904887 | 1.21E-06 | 4.82E-06 | 4.425508 |
| RAC3      | 0.594484 | 5.285643 | 4.900334 | 1.24E-06 | 4.91E-06 | 4.404127 |
| HIST1H4H  | -0.61468 | 6.611164 | -4.89218 | 1.29E-06 | 5.09E-06 | 4.365867 |
| FMO2      | 0.522804 | 7.348885 | 4.882359 | 1.35E-06 | 5.32E-06 | 4.319882 |
| ZNF813    | -0.6062  | 7.051223 | -4.86307 | 1.49E-06 | 5.79E-06 | 4.229815 |
| GUSB      | -0.5088  | 8.635473 | -4.85746 | 1.53E-06 | 5.93E-06 | 4.203648 |
| P2RX5     | 0.541005 | 5.839978 | 4.842366 | 1.64E-06 | 6.33E-06 | 4.133467 |
| TMEM209   | -0.52753 | 6.761134 | -4.82946 | 1.75E-06 | 6.69E-06 | 4.073602 |
| CDK1      | -0.59961 | 7.189365 | -4.82631 | 1.78E-06 | 6.79E-06 | 4.059036 |
| TWSG1     | 0.567354 | 7.487726 | 4.786474 | 2.15E-06 | 8.13E-06 | 3.875316 |
| ZBTB16    | 0.598022 | 6.390891 | 4.778708 | 2.23E-06 | 8.42E-06 | 3.839662 |
| PTN       | 0.521205 | 7.003349 | 4.771179 | 2.32E-06 | 8.71E-06 | 3.805152 |
| ANXA1     | 0.649885 | 9.443129 | 4.750559 | 2.55E-06 | 9.55E-06 | 3.710892 |
| CD48      | 0.51236  | 7.468759 | 4.739006 | 2.70E-06 | 1.01E-05 | 3.658246 |
| DSG1      | -0.52348 | 3.781693 | -4.72471 | 2.89E-06 | 1.07E-05 | 3.593271 |
| CLTC      | -0.52705 | 7.556901 | -4.68966 | 3.41E-06 | 1.25E-05 | 3.434717 |
| ANKRD36   | -0.75446 | 6.425487 | -4.68899 | 3.42E-06 | 1.25E-05 | 3.431695 |
| LMO3      | -0.57825 | 5.106309 | -4.65367 | 4.04E-06 | 1.46E-05 | 3.273056 |
| ZNF7      | -0.50078 | 6.207457 | -4.648   | 4.14E-06 | 1.49E-05 | 3.247695 |
| RPL27A    | -0.57005 | 8.736489 | -4.64034 | 4.30E-06 | 1.54E-05 | 3.213464 |
| XYLB      | -0.57855 | 4.233774 | -4.63946 | 4.31E-06 | 1.55E-05 | 3.209554 |
| CFD       | 0.620148 | 9.085904 | 4.633839 | 4.43E-06 | 1.58E-05 | 3.184468 |
| NF1       | -0.50839 | 4.16304  | -4.63355 | 4.43E-06 | 1.58E-05 | 3.183197 |
| SCGB1D2   | 1.226206 | 7.859455 | 4.600572 | 5.17E-06 | 1.83E-05 | 3.036659 |
| TLK1      | -0.5069  | 5.926944 | -4.59402 | 5.33E-06 | 1.88E-05 | 3.007662 |
| GSTT2     | 0.515704 | 5.508003 | 4.582484 | 5.62E-06 | 1.97E-05 | 2.956704 |
| TFB2M     | -0.53715 | 6.84173  | -4.57372 | 5.85E-06 | 2.05E-05 | 2.91808  |
| TMEM134   | -0.5134  | 7.084387 | -4.55234 | 6.46E-06 | 2.24E-05 | 2.824119 |
| CHIT1     | 0.524707 | 5.163226 | 4.547249 | 6.61E-06 | 2.29E-05 | 2.8018   |
| KIT       | 0.540085 | 7.961993 | 4.540577 | 6.81E-06 | 2.36E-05 | 2.772594 |
| GPR171    | 0.563187 | 5.585343 | 4.513435 | 7.71E-06 | 2.64E-05 | 2.654188 |

|           |          |          |          |          |          |          |
|-----------|----------|----------|----------|----------|----------|----------|
| CD3D      | 0.515288 | 8.023247 | 4.504149 | 8.05E-06 | 2.75E-05 | 2.613835 |
| PARD6B    | -0.56346 | 5.339925 | -4.42308 | 1.16E-05 | 3.87E-05 | 2.264823 |
| SLC27A2   | -0.55484 | 5.960176 | -4.3816  | 1.40E-05 | 4.60E-05 | 2.088529 |
| HMMR      | -0.5293  | 6.570596 | -4.36202 | 1.52E-05 | 4.98E-05 | 2.005816 |
| HIST1H2BM | -0.70228 | 4.531805 | -4.35313 | 1.58E-05 | 5.17E-05 | 1.968407 |
| TRIB1     | -0.68022 | 7.862968 | -4.33866 | 1.69E-05 | 5.47E-05 | 1.907651 |
| HIST1H1E  | -1.04664 | 5.607766 | -4.32979 | 1.76E-05 | 5.67E-05 | 1.870488 |
| S100A4    | 0.578831 | 10.28925 | 4.326349 | 1.78E-05 | 5.76E-05 | 1.856106 |
| PLAT      | 0.519603 | 8.932192 | 4.317771 | 1.85E-05 | 5.96E-05 | 1.820275 |
| WNT5A     | 0.521428 | 7.285172 | 4.315131 | 1.87E-05 | 6.02E-05 | 1.809257 |
| CRYAB     | 0.526973 | 8.584909 | 4.297558 | 2.02E-05 | 6.45E-05 | 1.736098 |
| TGFBR3    | 0.528011 | 8.779286 | 4.291256 | 2.08E-05 | 6.61E-05 | 1.709931 |
| CD37      | 0.63219  | 6.114857 | 4.282733 | 2.16E-05 | 6.85E-05 | 1.674599 |
| AMIGO2    | 0.579715 | 8.996325 | 4.267336 | 2.31E-05 | 7.28E-05 | 1.610934 |
| EPCAM     | -0.53426 | 11.30263 | -4.2624  | 2.36E-05 | 7.41E-05 | 1.590588 |
| AKR1C3    | 0.612938 | 8.204496 | 4.244603 | 2.55E-05 | 7.95E-05 | 1.517333 |
| PSD3      | 0.535276 | 7.357475 | 4.223965 | 2.78E-05 | 8.62E-05 | 1.432767 |
| FABP5     | 0.512211 | 9.381477 | 4.218217 | 2.85E-05 | 8.83E-05 | 1.409279 |
| MEX3C     | -0.52711 | 6.636636 | -4.20755 | 2.99E-05 | 9.22E-05 | 1.365794 |
| CGA       | -0.53826 | 4.304083 | -4.19175 | 3.20E-05 | 9.81E-05 | 1.301519 |
| PMEPA1    | 0.584745 | 8.634196 | 4.158738 | 3.68E-05 | 0.000112 | 1.168037 |
| GRIA2     | -0.69654 | 4.037961 | -4.15262 | 3.78E-05 | 0.000115 | 1.143423 |
| TECR      | -0.50277 | 8.429266 | -4.10247 | 4.67E-05 | 0.000139 | 0.942768 |
| LY6D      | -0.51433 | 5.024446 | -4.10115 | 4.69E-05 | 0.00014  | 0.937532 |
| FOSB      | 0.671531 | 6.35935  | 4.061103 | 5.55E-05 | 0.000163 | 0.779035 |
| C1orf54   | 0.517205 | 8.710455 | 4.057465 | 5.63E-05 | 0.000165 | 0.764712 |
| HLA-DPB1  | 0.564224 | 9.999116 | 4.007049 | 6.94E-05 | 0.0002   | 0.56743  |
| CRABP2    | -0.51258 | 10.0464  | -3.96624 | 8.21E-05 | 0.000234 | 0.409455 |
| CCL4      | 0.544238 | 7.374806 | 3.954958 | 8.59E-05 | 0.000244 | 0.366048 |
| PTPRT     | 0.506947 | 5.920532 | 3.951666 | 8.71E-05 | 0.000247 | 0.353405 |
| AR        | 0.517628 | 8.029001 | 3.945795 | 8.92E-05 | 0.000252 | 0.330881 |
| CST1      | 0.618996 | 5.803149 | 3.934027 | 9.36E-05 | 0.000264 | 0.28583  |
| HSPD1     | -0.59497 | 9.064064 | -3.89385 | 0.00011  | 0.000306 | 0.13299  |
| LRRC59    | -0.75097 | 7.728183 | -3.87925 | 0.000117 | 0.000323 | 0.077803 |
| ARL4A     | 0.530971 | 8.237741 | 3.878218 | 0.000117 | 0.000325 | 0.073923 |
| ART3      | -0.57214 | 4.416928 | -3.86793 | 0.000122 | 0.000338 | 0.03517  |
| NRTN      | -0.50567 | 4.265155 | -3.85725 | 0.000127 | 0.000351 | -0.00493 |
| MKL2      | -0.62068 | 7.302046 | -3.82835 | 0.000143 | 0.00039  | -0.11299 |
| TIMM13    | -0.50131 | 7.54953  | -3.77538 | 0.000176 | 0.000473 | -0.30903 |
| HSD17B12  | -0.64688 | 7.499334 | -3.67174 | 0.000263 | 0.000685 | -0.68502 |
| COMMD8    | 0.503052 | 8.554181 | 3.659268 | 0.000276 | 0.000716 | -0.72959 |
| FBXW12    | -0.58152 | 7.203081 | -3.64442 | 0.000292 | 0.000754 | -0.78247 |
| BMP4      | 0.50986  | 5.818141 | 3.607265 | 0.000336 | 0.000858 | -0.91389 |
| RPLP2     | -0.60515 | 5.694836 | -3.59845 | 0.000347 | 0.000885 | -0.94489 |

|          |          |          |          |          |          |          |
|----------|----------|----------|----------|----------|----------|----------|
| MORF4L2  | -0.51921 | 9.987908 | -3.55988 | 0.000401 | 0.001008 | -1.07964 |
| PTBP1    | -0.56656 | 8.507317 | -3.49146 | 0.000517 | 0.001264 | -1.31521 |
| IGHM     | 0.645896 | 7.975014 | 3.486089 | 0.000527 | 0.001287 | -1.33354 |
| CXCL9    | 0.609539 | 9.271134 | 3.477982 | 0.000543 | 0.001322 | -1.36112 |
| MMP1     | -0.74055 | 6.826843 | -3.47182 | 0.000555 | 0.001348 | -1.38204 |
| TCN1     | 0.63621  | 6.27866  | 3.42181  | 0.000665 | 0.001588 | -1.55055 |
| SCGB2A1  | 0.735127 | 6.71795  | 3.365666 | 0.000814 | 0.00191  | -1.73694 |
| CYP4B1   | 0.511744 | 6.275682 | 3.352009 | 0.000854 | 0.001995 | -1.78183 |
| KRT14    | 0.660456 | 9.074429 | 3.343665 | 0.00088  | 0.002047 | -1.80916 |
| MLPH     | 0.55485  | 10.35431 | 3.308083 | 0.000997 | 0.002291 | -1.92501 |
| IGLJ3    | 0.599899 | 7.400054 | 3.304163 | 0.001011 | 0.00232  | -1.9377  |
| CXCL10   | 0.56589  | 9.387481 | 3.279499 | 0.001102 | 0.002512 | -2.01721 |
| SERPINB6 | -0.52212 | 7.436353 | -3.27252 | 0.001129 | 0.002567 | -2.03959 |
| MMP2     | 0.583235 | 8.016881 | 3.224958 | 0.00133  | 0.002974 | -2.191   |
| NDUFA10  | -0.55885 | 7.051817 | -3.1929  | 0.001484 | 0.003286 | -2.29182 |
| RPS11    | -0.53404 | 9.107415 | -3.17266 | 0.00159  | 0.003499 | -2.355   |
| CXCL11   | 0.518836 | 6.352282 | 3.1721   | 0.001593 | 0.003504 | -2.35673 |
| NAT1     | 0.70807  | 9.3357   | 3.105909 | 0.001989 | 0.004298 | -2.56055 |
| PIP      | 0.754671 | 10.10035 | 3.051496 | 0.00238  | 0.005069 | -2.72497 |
| ELF5     | -0.51987 | 6.227691 | -3.00008 | 0.002814 | 0.005902 | -2.87777 |
| ISG15    | -0.50525 | 10.32223 | -2.99271 | 0.002882 | 0.006033 | -2.89947 |
| PABPC1   | -0.52522 | 10.77376 | -2.9769  | 0.003032 | 0.006324 | -2.94582 |
| LTF      | 0.633389 | 9.738503 | 2.924345 | 0.003585 | 0.007367 | -3.09823 |
| CLCA2    | 0.500025 | 5.306494 | 2.924109 | 0.003588 | 0.00737  | -3.09891 |
| KRT6A    | -0.57457 | 5.040791 | -2.85255 | 0.00449  | 0.009004 | -3.30217 |
| CXCL13   | 0.596973 | 7.689947 | 2.832362 | 0.00478  | 0.00953  | -3.35863 |
| BMPR1B   | -0.52139 | 6.099847 | -2.82044 | 0.004958 | 0.009833 | -3.39178 |
| S100A8   | -0.53404 | 6.753451 | -2.81862 | 0.004986 | 0.009885 | -3.39683 |
| CLGN     | 0.502263 | 6.151551 | 2.759395 | 0.005972 | 0.011635 | -3.55943 |
| MMP12    | -0.53601 | 6.152958 | -2.74035 | 0.006325 | 0.01226  | -3.61102 |
